# Supplementary material for: Acclimation and degradation characteristic of the microbial system in corn straw
Source: PeerJ journal article supplement (doi:10.7717/peerj.20386), 2025-12-16
Supplement: Raw_data_2.zip [file cellulase enzyme activity.xlsx]

## Sheet: Sheet1
enzyme activity U/mL
FPA		C1		CX		β-glucosidase
33.21	1.11d	36.34	2.2c	70.6	3.1a	52.4	2.5b
