# Supplementary material for: Acclimation and degradation characteristic of the microbial system in corn straw
Source: PeerJ journal article supplement (doi:10.7717/peerj.20386), 2025-12-16
Supplement: Raw_data_2.zip [file degradation rate.xlsx]

## Sheet: Sheet1
days	degradation rate
	corn straw		cellulose		hemicellulose		lignin
1	15.27	0.21g	15.35	0.56g	10.99	0.56g	24.56	0.99g
2	22.76	0.52f	24.96	0.28f	21.29	0.67f	38.67	0.29f
3	31.49	0.43a	37.34	0.49a	28.62	0.84a	53.84	0.12a
4	30.92	0.35b	37.21	0.25b	28.27	0.42b	52.42	0.27b
5	30.41	0.41c	36.99	0.97c	27.45	0.35c	52.35	0.45c
6	29.99	0.29d	36.8	0.42d	27.38	0.67d	51.97	0.58d
7	29.42	0.51e	36.51	0.92e	27.14	0.78e	51.78	0.84e
