# Supplementary material for: Acclimation and degradation characteristic of the microbial system in corn straw
Source: PeerJ journal article supplement (doi:10.7717/peerj.20386), 2025-12-16
Supplement: Raw_data_2.zip [file lingn enzyme activity.xlsx]

## Sheet: Sheet1
enzyme activity
Lip		Mnp		Lac
485	7.73a	376	5.25b	194	6.1c
