# Supplementary material for: Acclimation and degradation characteristic of the microbial system in corn straw
Source: PeerJ journal article supplement (doi:10.7717/peerj.20386), 2025-12-16
Supplement: Raw_data_2.zip [file OD600.xlsx]

## Sheet: Sheet1
Time	OD600
d
0	0
1	0.187	0.02	g
2	0.68	0.029	f
3	0.818	0.022	c
4	0.944	0.017	b
5	0.957	0.0152	a
6	0.715	0.024	d
7	0.698	0.021	e
