# Supplementary material for: Acclimation and degradation characteristic of the microbial system in corn straw
Source: PeerJ journal article supplement (doi:10.7717/peerj.20386), 2025-12-16
Supplement: Raw_data_2.zip [file ph.xlsx]

## Sheet: Sheet1
Time	pH
d
0	8.78	0.016	a
1	8.34	0.02	d
2	8.19	0.021	e
3	8.36	0.02	d
4	8.44	0.019	c
5	8.51	0.02	b
6	8.515	0.021	b
7	8.518	0.018	b
