# Supplementary material for: Acclimation and degradation characteristic of the microbial system in corn straw
Source: PeerJ journal article supplement (doi:10.7717/peerj.20386), 2025-12-16
Supplement: Raw_data_2.zip [file soluble sugar.xlsx]

## Sheet: Sheet1
Time	soluble sugar
d	μg/mL
0	3.9	0.21	g
1	5.8	0.19	f
2	7.6	0.24	c
3	8.9	0.22	a
4	7.76	0.19	b
5	6.96	0.31	d
6	6.38	0.25	e
7	6.33	0.27	e
