# Supplementary material for: Acclimation and degradation characteristic of the microbial system in corn straw
Source: PeerJ journal article supplement (doi:10.7717/peerj.20386), 2025-12-16
Supplement: Raw_data_2.zip [file total sugar.xlsx]

## Sheet: Sheet1
Time	total sugar
d	μg/mL
0	4	0.16	a
1	2.6	0.12	b
2	1.8	0.19	c
3	1.6	0.12	d
4	1.58	0.17	d
5	1.576	0.11	d
6	1.499	0.14	d
7	1.5	0.12	d
