# Supplementary material for: Acclimation and degradation characteristic of the microbial system in corn straw
Source: PeerJ journal article supplement (doi:10.7717/peerj.20386), 2025-12-16
Supplement: Raw_data_2.zip [file volatile fatty acid.xlsx]

## Sheet: Sheet1
day	acetic acid			butyric acid			propionic acid			lactic acid
1	190.6	13.4118	f	603.412	21.8	d	257.974	20.12	g	455.8	30.4	f
2	261.863	27.9412	b	727.941	17.5	b	358.882	19.24	c	762.5	23.06	b
3	368.15	18.8824	a	778.882	15.68	a	390.329	21.11	a	775.68	21.24	a
4	245.037	14.0588	c	678.059	19.18	c	371.171	18.34	b	689.18	19.93	c
5	236.15	18.6471	d	598.647	21.58	e	345.908	16.36	d	493.58	20.37	d
6	225.688	21.2353	e	581.235	16.18	f	320.25	18.34	e	461.18	18.24	e
7	167.412	23.98	g	543.98	16.12	g	311.447	20.41	f	356.12	15.89	g
