# Supplementary material for: Acclimation and degradation characteristic of the microbial system in corn straw
Source: PeerJ journal article supplement (doi:10.7717/peerj.20386), 2025-12-16
Supplement: Raw_data_3.zip [file Group.KEGG.enzyme.percentage.top30.histogram.pdf › Raw data 3 Structural of microbial communities/Group.KEGG.enzyme.percentage.top30.histogram.pdf]

Relative abundance

0.05  
0.04  
0.03  
0.02  
0.01  
0.00

48h

72h

- EC:3.6.4.12
- EC:2.7.7.7
- EC:2.7.13.3
- EC:7.1.1.2
- EC:5.2.1.8
- EC:3.1.-.-
- EC:3.1.21.3
- EC:3.4.16.4
- EC:3.4.24.-
- EC:2.1.1.72
- EC:5.6.2.2
- EC:3.2.1.4
- EC:2.7.7.6
- EC:2.7.11.1
- EC:7.4.2.8
- EC:2.1.1.-
- EC:3.6.4.-
- EC:3.6.4.13
- EC:3.4.21.-
- EC:2.3.1.-
- EC:7.2.1.1
- EC:4.2.2.-
- EC:1.1.1.100
- EC:6.3.1.2
- EC:3.4.21.102
- EC:3.1.2.-
- EC:3.6.1.-
- EC:3.4.-.-
- EC:6.3.5.5
- EC:3.5.1.28
