# Supplementary material for: Acclimation and degradation characteristic of the microbial system in corn straw
Source: PeerJ journal article supplement (doi:10.7717/peerj.20386), 2025-12-16
Supplement: Raw_data_3.zip [file KEGG.pathway top10 48h.pdf › Raw data 3 Structural of microbial communities/KEGG.pathway top10 48h.pdf]

48h

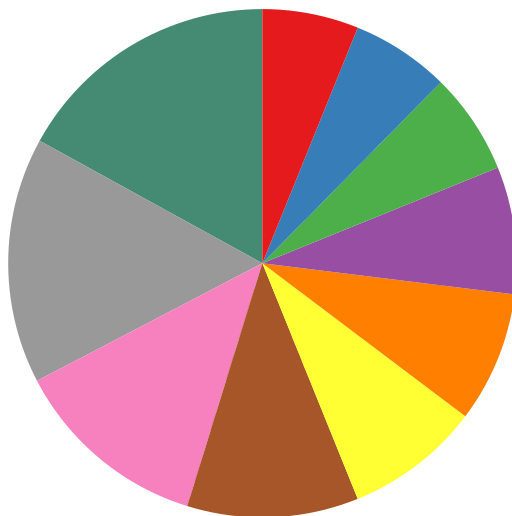

- Amino acid metabolism(0.0473)
- Carbohydrate metabolism(0.04356)
- Metabolism of cofactors and vitamins(0.03499)
- Energy metabolism(0.03031)
- Signal transduction(0.02392)
- Membrane transport(0.02316)
- Translation(0.02252)
- Nucleotide metabolism(0.018)
- Cellular community – prokaryotes(0.01744)
- Glycan biosynthesis and metabolism(0.01704)
