# Supplementary material for: Acclimation and degradation characteristic of the microbial system in corn straw
Source: PeerJ journal article supplement (doi:10.7717/peerj.20386), 2025-12-16
Supplement: Raw_data_3.zip [file KEGG.pathway.readNum.xls]

ID	A-3-1	A-3-2	A-3-3	A-4-1	A-4-2	A-4-3	Description
ko00010	455740	465666	439942	439627	409678	416273	Glycolysis / Gluconeogenesis
ko00020	374254	375326	374262	335943	317657	305658	Citrate cycle (TCA cycle)
ko00030	213602	219430	214188	203496	189972	195752	Pentose phosphate pathway
ko00040	79680	95838	77343	99754	96073	118181	Pentose and glucuronate interconversions
ko00051	163783	172319	145481	199564	171866	206330	Fructose and mannose metabolism
ko00052	173449	204995	174271	209220	197885	225205	Galactose metabolism
ko00053	36894	41391	34821	42110	38686	42173	Ascorbate and aldarate metabolism
ko00061	226619	227524	212587	216947	202654	200340	Fatty acid biosynthesis
ko00071	154266	158413	154594	163845	149907	154144	Fatty acid degradation
ko00100	4068	3655	1802	5871	4311	5777	Steroid biosynthesis
ko00120	2900	4453	4371	2951	4385	3527	Primary bile acid biosynthesis
ko00121	5900	6883	8162	4393	6083	5453	Secondary bile acid biosynthesis
ko00130	97431	97497	96504	92966	86955	89065	Ubiquinone and other terpenoid-quinone biosynthesis
ko00140	2481	2032	1491	1946	1732	930	Steroid hormone biosynthesis
ko00190	346080	376820	371318	355050	328912	365559	Oxidative phosphorylation
ko00195	51336	59650	68606	40629	47319	43054	Photosynthesis
ko00196	284	105	25	772	466	159	Photosynthesis - antenna proteins
ko00220	208107	216089	210608	206022	189274	203982	Arginine biosynthesis
ko00230	579697	602017	570979	580958	541660	566025	Purine metabolism
ko00240	357922	375559	347465	364517	340813	362363	Pyrimidine metabolism
ko00250	469747	485051	474058	460652	432780	453785	Alanine, aspartate and glutamate metabolism
ko00253	209	350	372	158	214	159	Tetracycline biosynthesis
ko00260	330772	349573	337867	301301	291318	279086	Glycine, serine and threonine metabolism
ko00261	79960	81233	79893	73655	68828	69361	Monobactam biosynthesis
ko00270	387894	404890	394746	390520	361300	387048	Cysteine and methionine metabolism
ko00280	182646	188436	212405	149038	154021	125986	Valine, leucine and isoleucine degradation
ko00281	27116	26427	36803	18049	19724	15430	Geraniol degradation
ko00290	142049	166166	171574	147844	152032	169512	Valine, leucine and isoleucine biosynthesis
ko00300	191785	201868	189722	200580	182990	204146	Lysine biosynthesis
ko00310	149294	142083	147780	125491	118367	94682	Lysine degradation
ko00311	18287	16559	22827	12896	13424	12419	Penicillin and cephalosporin biosynthesis
ko00330	236216	227404	251067	201676	194027	187820	Arginine and proline metabolism
ko00332	19290	21679	21471	21135	19762	25910	Carbapenem biosynthesis
ko00333	47328	48126	48880	42797	40715	38854	Prodigiosin biosynthesis
ko00340	144776	148527	143767	141151	132580	141526	Histidine metabolism
ko00350	124573	120167	150186	98544	106035	95502	Tyrosine metabolism
ko00360	157771	153900	179555	130071	134162	120099	Phenylalanine metabolism
ko00361	2924	5405	4723	3365	3668	3084	Chlorocyclohexane and chlorobenzene degradation
ko00362	99703	103110	114406	84776	83435	68516	Benzoate degradation
ko00364	1292	2699	2560	1565	2119	1140	Fluorobenzoate degradation
ko00365	175	399	369	85	139	159	Furfural degradation
ko00380	126407	123512	137763	97237	96030	74097	Tryptophan metabolism
ko00400	205032	220098	215817	218194	203677	236859	Phenylalanine, tyrosine and tryptophan biosynthesis
ko00401	41572	44530	42931	44487	42049	47945	Novobiocin biosynthesis
ko00405	18014	18933	19761	17150	16187	18286	Phenazine biosynthesis
ko00410	50880	52867	63971	43242	43437	40743	beta-Alanine metabolism
ko00430	57696	60210	68734	49823	50434	51311	Taurine and hypotaurine metabolism
ko00440	9475	11308	10231	8477	9352	9833	Phosphonate and phosphinate metabolism
ko00450	156691	168651	156507	153832	141301	150502	Selenocompound metabolism
ko00460	93869	113619	98240	95733	101739	97551	Cyanoamino acid metabolism
ko00470	76814	78984	70700	75529	66794	69541	D-Amino acid metabolism
ko00480	124111	126227	138391	99684	100223	85790	Glutathione metabolism
ko00500	316375	348618	265887	437251	383504	481809	Starch and sucrose metabolism
ko00510	4904	4513	2806	6366	4722	5064	N-Glycan biosynthesis
ko00511	121450	141569	124213	137372	128898	138517	Other glycan degradation
ko00513	32405	30821	27970	25434	23763	15917	Various types of N-glycan biosynthesis
ko00514	834	974	902	1240	1260	1494	Other types of O-glycan biosynthesis
ko00515	771	1060	992	986	1286	1541	Mannose type O-glycan biosynthesis
ko00520	403405	421776	366128	429384	381330	407959	Amino sugar and nucleotide sugar metabolism
ko00521	98900	101116	98352	95724	89946	93953	Streptomycin biosynthesis
ko00523	59374	59659	59282	60022	53650	57653	Polyketide sugar unit biosynthesis
ko00524	11778	12346	9112	13489	12073	13414	Neomycin, kanamycin and gentamicin biosynthesis
ko00525	32021	32543	31849	32236	29877	31576	Acarbose and validamycin biosynthesis
ko00531	48709	48900	45153	42062	39952	34241	Glycosaminoglycan degradation
ko00540	147261	158905	158351	139859	137501	135047	Lipopolysaccharide biosynthesis
ko00541	215336	224360	192225	231153	199672	215668	O-Antigen nucleotide sugar biosynthesis
ko00542	2182	3865	3908	2706	2528	3355	O-Antigen repeat unit biosynthesis
ko00550	304803	312344	289808	311150	287773	312541	Peptidoglycan biosynthesis
ko00561	66944	76809	69948	83558	75744	91601	Glycerolipid metabolism
ko00562	28263	32465	33648	25672	26577	26281	Inositol phosphate metabolism
ko00564	126355	133318	116995	161027	134157	170431	Glycerophospholipid metabolism
ko00565	1728	3353	3060	1324	1568	1845	Ether lipid metabolism
ko00571	1910	1847	837	5119	3186	5387	Lipoarabinomannan (LAM) biosynthesis
ko00572	1898	1956	1782	2735	1677	2054	Arabinogalactan biosynthesis - Mycobacterium
ko00590	9588	9596	9416	7029	7173	5705	Arachidonic acid metabolism
ko00591	1067	1906	1590	643	938	876	Linoleic acid metabolism
ko00592	10559	10048	13291	6553	7445	5951	alpha-Linolenic acid metabolism
ko00600	72537	88528	73526	97933	88950	109262	Sphingolipid metabolism
ko00601	13	6	4	2	8	2	Glycosphingolipid biosynthesis - lacto and neolacto series
ko00603	44621	45963	38393	47965	44009	43415	Glycosphingolipid biosynthesis - globo and isoglobo series
ko00604	31820	30370	27690	24510	23378	15489	Glycosphingolipid biosynthesis - ganglio series
ko00620	577595	592416	598496	531643	506944	502785	Pyruvate metabolism
ko00621	4107	5367	4003	6548	5661	6822	Dioxin degradation
ko00622	5150	6748	4993	7998	7190	7262	Xylene degradation
ko00623	10098	11737	15409	6988	8318	6674	Toluene degradation
ko00624	375	1619	1632	475	150	167	Polycyclic aromatic hydrocarbon degradation
ko00625	36583	36811	40545	36796	36774	37244	Chloroalkane and chloroalkene degradation
ko00626	11452	13403	13773	12404	12844	12781	Naphthalene degradation
ko00627	40008	38540	43921	30241	28015	21428	Aminobenzoate degradation
ko00630	349171	369550	376751	312944	301966	289655	Glyoxylate and dicarboxylate metabolism
ko00633	8022	7388	8030	6471	4888	4561	Nitrotoluene degradation
ko00640	235937	254600	267455	208749	206514	196332	Propanoate metabolism
ko00642	9558	8127	11739	5962	6534	5048	Ethylbenzene degradation
ko00643	27731	26046	33710	17918	19146	14876	Styrene degradation
ko00650	306929	313847	307992	289122	269737	257253	Butanoate metabolism
ko00660	85574	98144	96308	82995	86034	84701	C5-Branched dibasic acid metabolism
ko00670	179218	187391	176046	175112	164727	172144	One carbon pool by folate
ko00680	270500	284646	284514	256016	238948	248085	Methane metabolism
ko00710	186908	194372	189790	184515	171359	178552	Carbon fixation in photosynthetic organisms
ko00720	433132	441346	426710	401511	378043	373989	Carbon fixation pathways in prokaryotes
ko00730	140197	151415	143924	143354	131867	151303	Thiamine metabolism
ko00740	52640	54420	58733	49006	46644	51394	Riboflavin metabolism
ko00750	67821	69649	67293	64463	62877	63065	Vitamin B6 metabolism
ko00760	156643	160082	154117	150828	143934	143804	Nicotinate and nicotinamide metabolism
ko00770	147673	164690	165420	153784	149724	165270	Pantothenate and CoA biosynthesis
ko00780	149520	147145	148156	146434	134014	143701	Biotin metabolism
ko00785	17316	17415	17739	13211	12955	9568	Lipoic acid metabolism
ko00790	136170	143708	136840	132831	124806	129873	Folate biosynthesis
ko00791	650	1349	1521	924	411	450	Atrazine degradation
ko00830	10494	10451	10804	8132	8885	5807	Retinol metabolism
ko00860	235119	234311	257104	198642	191537	191833	Porphyrin and chlorophyll metabolism
ko00900	145999	153823	146393	147207	137480	146338	Terpenoid backbone biosynthesis
ko00901	13	19	22	14	20	12	Indole alkaloid biosynthesis
ko00903	23694	23008	28852	21566	21324	20960	Limonene and pinene degradation
ko00906	7033	8374	5186	13007	10640	14831	Carotenoid biosynthesis
ko00908	14574	15309	13888	13873	13215	13032	Zeatin biosynthesis
ko00909	1422	1613	582	3595	2513	4372	Sesquiterpenoid and triterpenoid biosynthesis
ko00910	190689	202127	199482	184359	175763	181415	Nitrogen metabolism
ko00920	171977	181244	204598	144786	147019	143776	Sulfur metabolism
ko00930	14482	14761	19743	10459	11586	9499	Caprolactam degradation
ko00940	62544	75207	64720	67160	72760	70701	Phenylpropanoid biosynthesis
ko00941	0	5	0	2	6	0	Flavonoid biosynthesis
ko00944	2793	3137	1470	3384	3213	3137	Flavone and flavonol biosynthesis
ko00945	0	5	0	2	6	0	Stilbenoid, diarylheptanoid and gingerol biosynthesis
ko00950	26135	25699	26957	23000	21842	20613	Isoquinoline alkaloid biosynthesis
ko00960	40655	42459	41887	40381	38665	41746	Tropane, piperidine and pyridine alkaloid biosynthesis
ko00965	3465	3695	4036	2462	2641	2440	Betalain biosynthesis
ko00966	24678	28943	27964	26525	26704	30617	Glucosinolate biosynthesis
ko00970	546375	567492	524493	563459	514062	563238	Aminoacyl-tRNA biosynthesis
ko00980	9714	11857	14940	7110	9182	6576	Metabolism of xenobiotics by cytochrome P450
ko00981	10136	9861	10546	12041	10982	12389	Insect hormone biosynthesis
ko00982	13577	15148	19565	9395	11042	8392	Drug metabolism - cytochrome P450
ko00983	109509	107886	103919	99832	95996	88375	Drug metabolism - other enzymes
ko00984	12741	9038	15790	8325	7781	7185	Steroid degradation
ko00997	8235	6948	4964	8758	6069	6617	Biosynthesis of various secondary metabolites - part 3
ko00998	7826	7943	7530	7224	6957	7054	Biosynthesis of various secondary metabolites - part 2
ko01040	6934	6074	8479	4954	5526	4227	Biosynthesis of unsaturated fatty acids
ko01051	26430	28412	27548	27413	25454	28290	Biosynthesis of ansamycins
ko01052	16	25	12	5	16	19	Type I polyketide structures
ko01053	3464	6460	6145	2213	3314	3171	Biosynthesis of siderophore group nonribosomal peptides
ko01054	3734	3810	3714	3717	3196	2149	Nonribosomal peptide structures
ko01055	16932	17074	17186	15450	15032	14748	Biosynthesis of vancomycin group antibiotics
ko01057	3	12	15	3	20	13	Biosynthesis of type II polyketide products
ko01059	60	230	45	12	106	22	Biosynthesis of enediyne antibiotics
ko01501	231702	241672	239563	215766	206560	207698	beta-Lactam resistance
ko01502	87577	90842	81440	89739	83189	90584	Vancomycin resistance
ko01503	148588	160356	161610	136456	134021	131654	Cationic antimicrobial peptide (CAMP) resistance
ko01521	32	13	14	33	25	35	EGFR tyrosine kinase inhibitor resistance
ko01523	52819	55852	54472	49554	48252	49895	Antifolate resistance
ko01524	20209	25563	27556	18392	20316	22026	Platinum drug resistance
ko02010	662205	714412	743756	628663	615277	640809	ABC transporters
ko02020	967873	1005359	1070001	917030	888432	925124	Two-component system
ko02024	509768	564568	532283	543354	500397	546621	Quorum sensing
ko02025	134313	123894	149124	131468	120295	125974	Biofilm formation - Pseudomonas aeruginosa
ko02026	108216	107442	120634	105354	99983	111094	Biofilm formation - Escherichia coli
ko02030	305769	314877	356372	245608	267262	251325	Bacterial chemotaxis
ko02040	278997	289666	342980	228871	241739	231272	Flagellar assembly
ko02060	30424	31517	35112	33772	30632	38822	Phosphotransferase system (PTS)
ko03008	13557	13915	15394	13716	13055	14573	Ribosome biogenesis in eukaryotes
ko03010	257886	269003	252865	261375	240299	256262	Ribosome
ko03013	142	145	77	274	112	165	Nucleocytoplasmic transport
ko03015	208	324	148	311	174	240	mRNA surveillance pathway
ko03018	287919	302037	291611	280460	267244	281440	RNA degradation
ko03020	137250	144055	138145	138333	128202	139483	RNA polymerase
ko03022	2846	3605	1757	7799	5357	10233	Basal transcription factors
ko03030	298957	310504	281788	304744	281759	298912	DNA replication
ko03040	48	122	52	63	99	142	Spliceosome
ko03050	199	305	117	378	126	273	Proteasome
ko03060	200350	208263	194973	203432	189251	197553	Protein export
ko03070	230447	257634	245604	236627	224924	231951	Bacterial secretion system
ko03320	81524	89067	74357	89737	81371	84733	PPAR signaling pathway
ko03410	152921	158484	151851	149756	142063	149325	Base excision repair
ko03420	280551	290170	255598	301036	271272	301624	Nucleotide excision repair
ko03430	358220	370274	333741	364894	335450	357857	Mismatch repair
ko03440	405632	414646	386840	425158	386531	426373	Homologous recombination
ko03450	3597	3419	3937	2569	1950	1565	Non-homologous end-joining
ko03460	286	469	171	566	342	514	Fanconi anemia pathway
ko04010	202	259	228	151	150	103	MAPK signaling pathway
ko04011	5509	7549	7704	4706	4226	4902	MAPK signaling pathway - yeast
ko04013	8329	8368	7688	7809	7144	6080	MAPK signaling pathway - fly
ko04016	24549	30873	32251	22692	23495	27225	MAPK signaling pathway - plant
ko04022	64	121	65	37	64	52	cGMP-PKG signaling pathway
ko04024	64	121	65	37	64	52	cAMP signaling pathway
ko04066	74759	75596	74915	72650	67438	72505	HIF-1 signaling pathway
ko04068	19163	21754	19275	23156	18724	24216	FoxO signaling pathway
ko04070	21217	22494	22137	23315	21026	24667	Phosphatidylinositol signaling system
ko04071	56	113	37	107	132	63	Sphingolipid signaling pathway
ko04072	3135	3150	3005	4781	3746	5152	Phospholipase D signaling pathway
ko04080	292	305	304	290	355	321	Neuroactive ligand-receptor interaction
ko04110	372	177	74	942	261	194	Cell cycle
ko04111	324	110	30	836	216	115	Cell cycle - yeast
ko04112	209051	216822	204017	214342	198797	210930	Cell cycle - Caulobacter
ko04113	22995	19155	11595	46451	30106	43515	Meiosis - yeast
ko04114	388	231	95	873	280	167	Oocyte meiosis
ko04115	642	846	585	1233	931	1227	p53 signaling pathway
ko04120	359	120	30	893	223	123	Ubiquitin mediated proteolysis
ko04122	66095	69252	71541	58883	56982	57808	Sulfur relay system
ko04137	35	10	0	57	7	8	Mitophagy - animal
ko04138	1880	1926	1485	2244	1851	1918	Autophagy - yeast
ko04140	40	60	31	101	55	79	Autophagy - animal
ko04141	31334	31972	28274	32736	29142	29679	Protein processing in endoplasmic reticulum
ko04142	61745	63379	57446	52594	50347	41785	Lysosome
ko04144	11	16	10	52	42	129	Endocytosis
ko04145	6	8	12	30	6	6	Phagosome
ko04146	92409	98853	90335	89239	82510	80114	Peroxisome
ko04150	32	13	14	33	25	35	mTOR signaling pathway
ko04151	30895	31885	27168	36866	31014	37363	PI3K-Akt signaling pathway
ko04152	17208	18532	16038	24250	19670	28716	AMPK signaling pathway
ko04210	4070	5392	3788	5111	4898	4641	Apoptosis
ko04211	13784	15864	15345	12438	11307	10962	Longevity regulating pathway
ko04212	76532	84377	79945	76995	72863	74879	Longevity regulating pathway - worm
ko04213	65125	64550	55943	84309	67068	79603	Longevity regulating pathway - multiple species
ko04214	9055	9594	9181	8298	7438	6817	Apoptosis - fly
ko04215	646	846	588	1236	933	1227	Apoptosis - multiple species
ko04216	56549	56998	45845	55723	50470	47801	Ferroptosis
ko04217	96785	96628	93176	102065	90904	103940	Necroptosis
ko04218	64	121	65	37	64	52	Cellular senescence
ko04260	11642	13774	17215	8177	9756	8009	Cardiac muscle contraction
ko04261	64	121	65	37	64	52	Adrenergic signaling in cardiomyocytes
ko04270	64	121	65	37	64	52	Vascular smooth muscle contraction
ko04361	3680	3578	3429	5586	4237	5428	Axon regeneration
ko04371	32	13	14	33	25	35	Apelin signaling pathway
ko04390	64	121	65	37	64	52	Hippo signaling pathway
ko04391	3085	3154	1145	8910	4939	9158	Hippo signaling pathway - fly
ko04392	3085	3154	1145	8910	4939	9158	Hippo signaling pathway - multiple species
ko04510	202	350	270	119	212	143	Focal adhesion
ko04512	593	388	318	245	190	111	ECM-receptor interaction
ko04530	48	67	44	106	45	79	Tight junction
ko04550	2	2	0	6	0	3	Signaling pathways regulating pluripotency of stem cells
ko04611	64	121	68	44	70	71	Platelet activation
ko04612	25353	25764	23036	26061	23426	24011	Antigen processing and presentation
ko04614	7442	7760	5325	5952	5531	3617	Renin-angiotensin system
ko04621	48993	50994	50409	50655	44952	45297	NOD-like receptor signaling pathway
ko04622	9	14	2	59	9	61	RIG-I-like receptor signaling pathway
ko04626	87130	92901	91808	89411	82118	85432	Plant-pathogen interaction
ko04657	25346	25753	23019	26033	23424	23983	IL-17 signaling pathway
ko04659	25346	25753	23019	26033	23424	23983	Th17 cell differentiation
ko04668	40	3	4	86	11	8	TNF signaling pathway
ko04714	76811	78884	74612	71283	67487	64813	Thermogenesis
ko04720	64	121	65	37	64	52	Long-term potentiation
ko04723	2428	2589	1176	6934	4735	8802	Retrograde endocannabinoid signaling
ko04724	60016	57106	59612	55916	49938	53351	Glutamatergic synapse
ko04726	4041	3500	4946	2394	2096	1919	Serotonergic synapse
ko04727	60935	58609	61473	56386	50557	53839	GABAergic synapse
ko04728	4105	3621	5011	2431	2160	1971	Dopaminergic synapse
ko04750	252	145	114	316	107	260	Inflammatory mediator regulation of TRP channels
ko04810	70	142	67	37	82	60	Regulation of actin cytoskeleton
ko04910	27886	30633	24942	40068	33762	48144	Insulin signaling pathway
ko04912	40	3	4	86	11	8	GnRH signaling pathway
ko04914	25670	25863	23049	26869	23640	24098	Progesterone-mediated oocyte maturation
ko04915	25350	25759	23023	26059	23426	24011	Estrogen signaling pathway
ko04917	1398	1444	930	1826	1444	1488	Prolactin signaling pathway
ko04918	12446	11407	13057	9056	9334	7291	Thyroid hormone synthesis
ko04919	6092	7258	5374	9312	7604	11736	Thyroid hormone signaling pathway
ko04920	60534	61305	48259	65238	56858	59878	Adipocytokine signaling pathway
ko04921	200	289	143	307	158	255	Oxytocin signaling pathway
ko04922	61931	64082	57631	69246	61587	76306	Glucagon signaling pathway
ko04924	5098	4161	2672	3502	2793	966	Renin secretion
ko04926	0	0	3	7	6	19	Relaxin signaling pathway
ko04928	46	20	15	111	28	31	Parathyroid hormone synthesis, secretion and action
ko04930	16751	17789	16775	14047	14145	14038	Type II diabetes mellitus
ko04931	39643	43144	36240	54390	45889	64057	Insulin resistance
ko04932	13370	15897	18340	12690	12907	13757	Non-alcoholic fatty liver disease
ko04933	6	21	5	7	24	27	AGE-RAGE signaling pathway in diabetic complications
ko04934	4901	5715	6756	3395	3893	3580	Cushing syndrome
ko04936	17737	19661	21631	18573	19682	17039	Alcoholic liver disease
ko04940	23353	25018	23502	23375	22481	21989	Type I diabetes mellitus
ko04964	10653	11878	9410	14953	11144	15291	Proximal tubule bicarbonate reclamation
ko04970	7287	6767	4505	7274	5909	4275	Salivary secretion
ko04972	7287	6767	4505	7274	5909	4275	Pancreatic secretion
ko04973	7674	7317	4978	7995	6649	5707	Carbohydrate digestion and absorption
ko04974	13936	14598	10328	11911	12142	8041	Protein digestion and absorption
ko04975	22623	22264	27317	16375	17351	12835	Fat digestion and absorption
ko04976	80	69	46	162	50	88	Bile secretion
ko04977	2	4	2	5	4	4	Vitamin digestion and absorption
ko04978	16606	20416	21689	15047	16646	18825	Mineral absorption
ko04979	292	305	304	290	355	321	Cholesterol metabolism
ko05010	35810	37855	42839	31825	31613	32090	Alzheimer disease
ko05012	24861	27017	30514	23477	22586	23683	Parkinson disease
ko05014	28269	32406	34835	24972	24267	24485	Amyotrophic lateral sclerosis
ko05016	30712	32606	34472	27308	26715	25060	Huntington disease
ko05017	2638	3786	3053	3088	2788	2781	Spinocerebellar ataxia
ko05020	13865	16526	18925	13139	13365	14209	Prion disease
ko05022	28308	32416	34838	25032	24285	24493	Pathways of neurodegeneration - multiple diseases
ko05030	4041	3500	4946	2394	2096	1919	Cocaine addiction
ko05031	4105	3621	5011	2431	2160	1971	Amphetamine addiction
ko05034	4105	3621	5011	2431	2160	1971	Alcoholism
ko05100	553	1024	1006	388	857	985	Bacterial invasion of epithelial cells
ko05110	14	21	50	42	11	29	Vibrio cholerae infection
ko05111	125472	124307	134354	121854	110516	115927	Biofilm formation - Vibrio cholerae
ko05120	43320	43464	40859	44537	39878	45346	Epithelial cell signaling in Helicobacter pylori infection
ko05130	23084	22806	25105	20382	19602	19557	Pathogenic Escherichia coli infection
ko05131	17590	21026	23216	18199	15617	16025	Shigellosis
ko05132	71791	73476	75271	70468	63867	64233	Salmonella infection
ko05133	25449	35856	34650	25110	28242	29389	Pertussis
ko05134	84084	85648	83693	84738	78214	77075	Legionellosis
ko05135	200	160	163	284	178	96	Yersinia infection
ko05140	92	75	45	181	63	79	Leishmaniasis
ko05142	17816	14526	14311	12382	11453	6649	Chagas disease
ko05143	13141	11089	11954	9490	9316	6522	African trypanosomiasis
ko05145	646	852	589	1259	926	1255	Toxoplasmosis
ko05146	11903	11806	9267	12426	10988	11985	Amoebiasis
ko05150	2141	3681	2497	1271	1647	1229	Staphylococcus aureus infection
ko05152	66909	71028	69437	65614	62725	66268	Tuberculosis
ko05160	679	901	603	1332	981	1306	Hepatitis C
ko05161	690	913	629	1339	969	1306	Hepatitis B
ko05162	683	907	607	1358	981	1334	Measles
ko05163	642	846	585	1233	924	1227	Human cytomegalovirus infection
ko05164	683	907	628	1341	986	1306	Influenza A
ko05165	16562	17549	16560	13509	13611	12760	Human papillomavirus infection
ko05166	674	486	384	1224	618	482	Human T-cell leukemia virus 1 infection
ko05167	677	856	585	1290	931	1235	Kaposi sarcoma-associated herpesvirus infection
ko05168	743	1022	668	1369	1043	1358	Herpes simplex virus 1 infection
ko05169	644	856	588	1236	935	1244	Epstein-Barr virus infection
ko05170	642	846	585	1233	924	1227	Human immunodeficiency virus 1 infection
ko05171	5564	4711	2884	4446	3254	1628	Coronavirus disease - COVID-19
ko05200	36208	38582	37706	35888	33789	34246	Pathways in cancer
ko05203	16509	17434	16411	13606	13596	12873	Viral carcinogenesis
ko05204	3222	4649	5659	2317	2993	2235	Chemical carcinogenesis - DNA adducts
ko05205	6964	7860	7392	7678	7486	8844	Proteoglycans in cancer
ko05206	26366	29345	25746	30517	25898	28163	MicroRNAs in cancer
ko05207	28568	30402	28678	28350	26417	26218	Chemical carcinogenesis - receptor activation
ko05208	33364	38978	41816	30878	30607	30531	Chemical carcinogenesis - reactive oxygen species
ko05210	642	846	585	1233	924	1227	Colorectal cancer
ko05211	4820	5281	6392	3369	3549	3227	Renal cell carcinoma
ko05215	25346	25753	23019	26033	23424	23983	Prostate cancer
ko05219	5438	4294	7079	3492	3789	3323	Bladder cancer
ko05222	648	867	587	1233	942	1235	Small cell lung cancer
ko05225	5394	6681	7708	5253	5874	5801	Hepatocellular carcinoma
ko05230	68614	70358	70827	61347	58812	59519	Central carbon metabolism in cancer
ko05231	3135	3150	3005	4781	3746	5152	Choline metabolism in cancer
ko05322	398	361	248	456	257	141	Systemic lupus erythematosus
ko05340	8240	8291	8080	8450	7655	8242	Primary immunodeficiency
ko05410	5616	4781	2931	4034	2980	1406	Hypertrophic cardiomyopathy
ko05414	521	625	272	534	187	440	Dilated cardiomyopathy
ko05415	91910	90957	98812	78253	76781	73474	Diabetic cardiomyopathy
ko05416	642	846	585	1233	924	1227	Viral myocarditis
ko05417	56738	58490	52908	58028	53348	52878	Lipid and atherosclerosis
ko05418	51991	55234	51775	53992	50162	52782	Fluid shear stress and atherosclerosis
Others	23623276	24563901	22729743	24542261	22514765	23599469	Others
