# Supplementary material for: Acclimation and degradation characteristic of the microbial system in corn straw
Source: PeerJ journal article supplement (doi:10.7717/peerj.20386), 2025-12-16
Supplement: Raw_data_3.zip [file KEGG.pathway72h.pdf › Raw data 3 Structural of microbial communities/KEGG.pathway72h.pdf]

72h

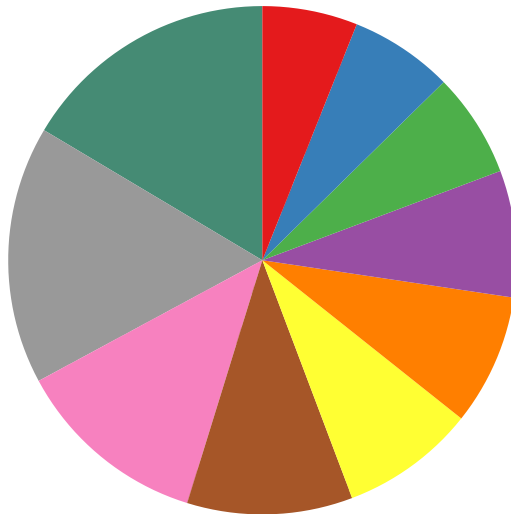

- Carbohydrate metabolism(0.04426)
- Amino acid metabolism(0.04419)
- Metabolism of cofactors and vitamins(0.03324)
- Energy metabolism(0.02832)
- Translation(0.02302)
- Signal transduction(0.02245)
- Membrane transport(0.0217)
- Nucleotide metabolism(0.01788)
- Glycan biosynthesis and metabolism(0.01771)
- Cellular community – prokaryotes(0.0163)
