# Supplementary material for: Acclimation and degradation characteristic of the microbial system in corn straw
Source: PeerJ journal article supplement (doi:10.7717/peerj.20386), 2025-12-16
Supplement: Raw_data_5FTIR_observation.zip [file 0.pdf › Raw data 5FTIR observation/0.pdf]

## Detail information on the report

Reporting location D: Li Hongjia infrared sample view 1\_Administrator 259. pdf  
Report creator Administrator  
Report date November 4, 2022, Friday, 11:05

## Detailed information on the sample

Name of sample Administrator259  
Sample description Sample 259 User Administrator Date Friday, November 04 2022  
analyst Administrator  
creation date 2022-11-4 11:03:53  
X-axis units cm-1  
Y-axis units %T

## Instrument details

Instrument model SpectrumTwo  
Instrument serial number 97951  
software release NIOS2Main00.02.006429-November-2013 10:09:27  
Number of scans 1  
resolution ratio 4

## Instrument details (all)

Instrument model SpectrumTwo  
Instrument serial number 97951  
software version NIOS2Main00.02.006429-November-2013 10:09:27  
Number of scans 1  
resolution ratio 4  
detector MIRTGS  
illuminant MIR  
light splitter OptKBr  
apodization Stubborn  
spectrum types Light spectrum  
beam type Ratio  
Correction of phase Range  
Scan speed 0.2  
IGram Type Two  
scanning direction Assemble  
zero crossing 0  
J-Stop aperture 8.94  
IR-laser wave number 11750.00  
manufacturer L1600235  
part number L1600235  
serial number 36926  
instruction ATRSampleplateDiamond  
The default scanning range is / cm-1 4000450  
Force applied / N 30  
Attachment type Universal ATR  
UATRcrystal combination Diamond  
UATR, number of rebounds 1  
UATR options Not specified

## appendix

Manufacturer L1600235  
part number L1600235  
serial number 36926  
instruction ATRSampleplateDiamond  
The default scan range is / cm-1 4000450  
Force applied / N 30  
Attachment type Universal  
UATRcrystal combination ATR, diamond  
UATR, number of rebounds 1  
UATR options Not specified

spectrogram

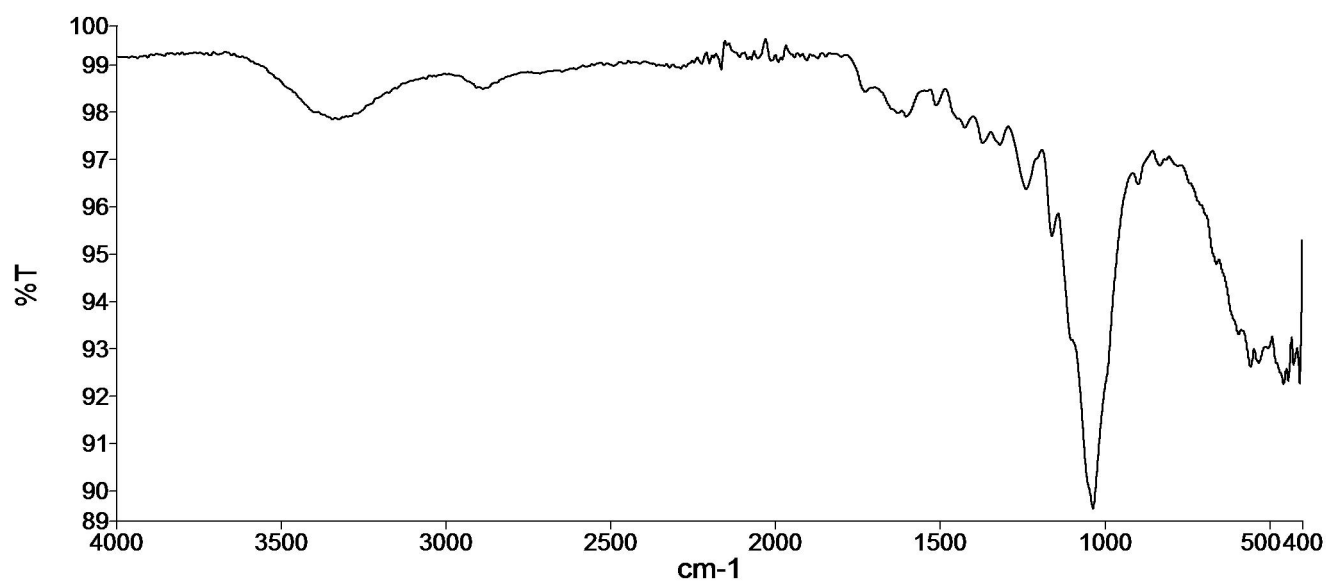

| Name                                                                                                | Explain                                                     |
|-----------------------------------------------------------------------------------------------------|-------------------------------------------------------------|
|  Administrator 259 | Sample 259 User Administrator Date Friday, November 04 2022 |
