# Supplementary material for: Acclimation and degradation characteristic of the microbial system in corn straw
Source: PeerJ journal article supplement (doi:10.7717/peerj.20386), 2025-12-16
Supplement: Raw_data_5FTIR_observation.zip [file 3.pdf › Raw data 5FTIR observation/3.pdf]

#### Detailed information on the report

Reporting location D: Li Hongjia infrared sample view 1\_ 260.pdf  
Report creator Administrator Administrator  
Report date November 4, 2022, Friday, 11:08

#### Detailed information on the sample

Name of sample Administrator 260  
Sample description Sample 260 User Administrator Date Friday, November 04 2022  
analyst Administrator  
creation date 2022-11-4 11:08:05  
X-axis units cm-1  
Y-axis units %T

#### Instrument details

Instrument model Spectrum Two  
Instrument serial number 97951  
software release NIOS2 Main 00.02.0064 29-November-2013 10:09:27  
Number of scans 1  
resolution ratio 4

#### Instrument details (all)

Instrument model SpectrumTwo  
Instrument serial number 97951  
software version NIOS2Main00.02.006429-November-201310:09:27  
Number of scans 1  
resolution ratio 4  
detector MIRTGS  
illuminant MIR  
light splitter OptKBr  
apodization Stubborn  
spectrum types Lightspectrum  
beam type Ratio  
Correctionofphase Range  
Scanspeed 0.2  
IGramType Two  
scanning direction Assemble  
zero crossing 0  
J-Stop aperture 8.94  
IR-laserwavenumber 11750.00  
manufacturer L1600235  
part number L1600235  
serial number 36926  
instruction ATRSamplebaseplateDiamond

The default scanning range is/cm-1

Forceapplied/N 4000450  
Attachmenttype 30  
UATRcrystal combination Universal ATR  
UATR, numberofrebounds Diamond  
UATROptions 1  
Not specified

#### appendix

Manufacturer L1600235  
part number L1600235  
serial number 36926  
instruction ATR Sample base plate Diamond  
The default scan range is/cm-1 4000 450  
Forceapplied/N 30  
Attachmenttype Universal ATR  
UATRcrystal combination diamond  
UATR, numberofrebounds 1  
UATROptions Not specified

spectrogram

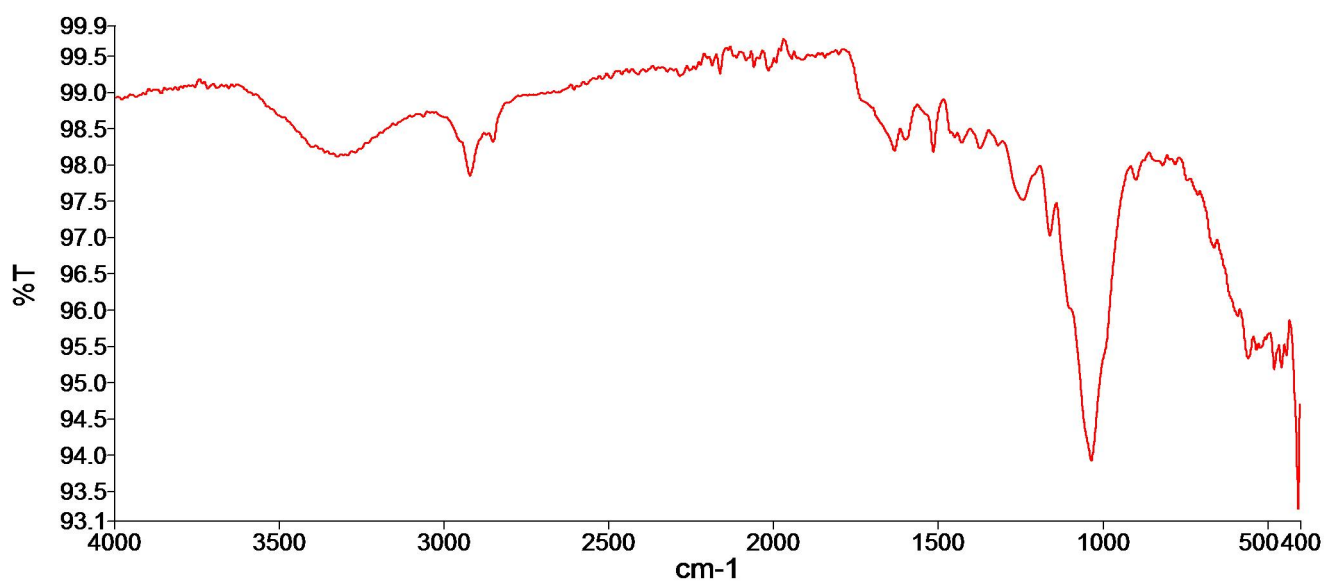

| Name                                                                                                                                                                          | Explain                                                     |
|-------------------------------------------------------------------------------------------------------------------------------------------------------------------------------|-------------------------------------------------------------|
| <div style="display: flex; align-items: center;"> <div style="width: 20px; height: 2px; background-color: red; margin-right: 5px;"></div> <div>Administrator 260</div> </div> | Sample 260 User Administrator Date Friday, November 04 2022 |
