# Supplementary material for: Acclimation and degradation characteristic of the microbial system in corn straw
Source: PeerJ journal article supplement (doi:10.7717/peerj.20386), 2025-12-16
Supplement: Raw_data_5FTIR_observation.zip [file 5.pdf › Raw data 5FTIR observation/5.pdf]

Detailed information on the report

Reporting location D: Li Hongjia infrared sample view 1\_ 261.pdf  
Report creator Administrator Administrator  
Report date November 4, 2022, Friday, 11:11

Detailed information on the sample

Name of sample Administrator 261  
Sample description Sample 261 User Administrator Date Friday, November 04 2022  
analyst Administrator  
creation date 2022-11-4 11:10:42  
X-axis units cm-1  
Y-axis units %T

Instrument details

Instrument model Spectrum Two  
Instrument serial number 97951  
software release NIOS2 Main 00.02.0064 29-November-2013 10:09:27  
Number of scans 1  
resolution ratio 4

Instrument details (all)

Instrument model Spectrum Two  
Instrument serial number 97951  
software version NIOS2 Main 00.02.0064 29-November-2013 10:09:27  
Number of scans 1  
resolution ratio 4  
detector MIR TGS  
illuminant MIR  
light splitter OptKBr  
apodization Stubborn  
spectrum types Light spectrum  
beam type Ratio  
Correction of phase Range  
Scanspeed 0.2  
IGramType Two  
scanning direction Assemble  
zero crossing 0  
J-Stop aperture 8.94  
IR-laser wavenumber 11750.00  
manufacturer L1600235  
part number L1600235  
serial number 36926  
instruction ATR Sample base plate Diamond  
The default scanning range is / cm-1 4000 450  
Force applied/N 30  
Attachment type Universal ATR  
UATR crystal combination Diamond  
UATR, number of rebounds 1  
UATR options Not specified

appendix

Manufacturer L1600235  
part number L1600235  
serial number 36926  
instruction ATR Sample base plate Diamond  
The default scan range is / cm-1 4000 450  
Force applied/N 30  
Attachment type Universal  
UATR crystal combination ATR, diamond  
UATR, number of rebounds 1  
UATR options Not specified

spectrogram

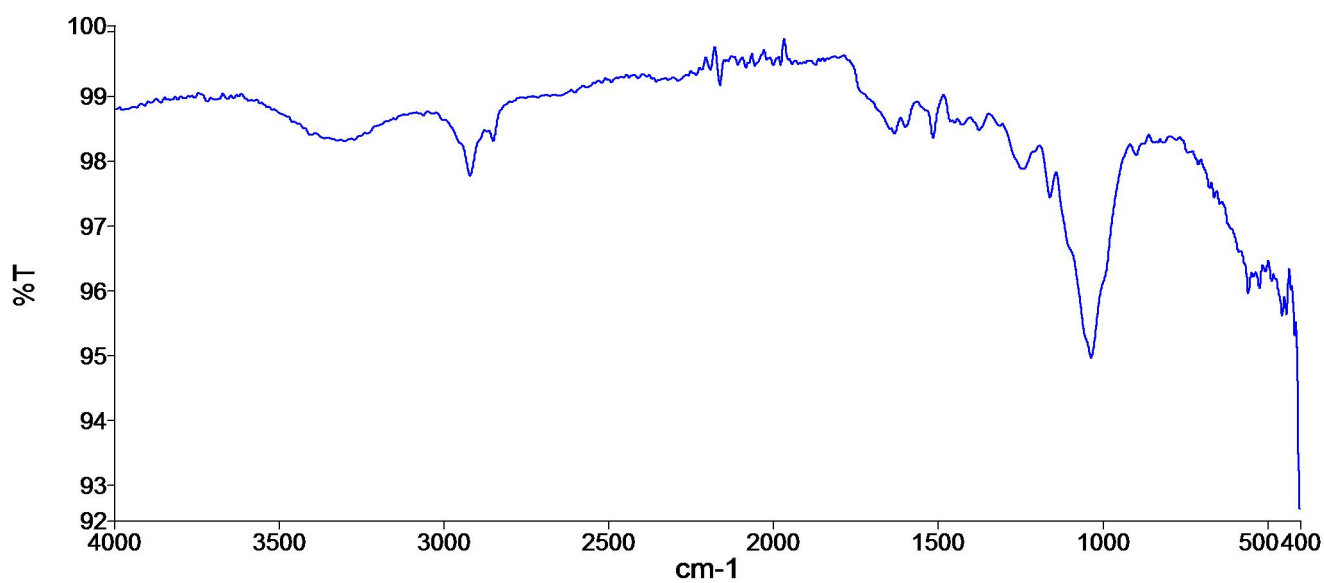

| Name                     | Explain                                                     |
|--------------------------|-------------------------------------------------------------|
| <u>Administrator 261</u> | Sample 261 User Administrator Date Friday, November 04 2022 |
