# Supplementary figures and images for: Acclimation and degradation characteristic of the microbial system in corn straw
Source: PeerJ journal article supplement (doi:10.7717/peerj.20386), 2025-12-16

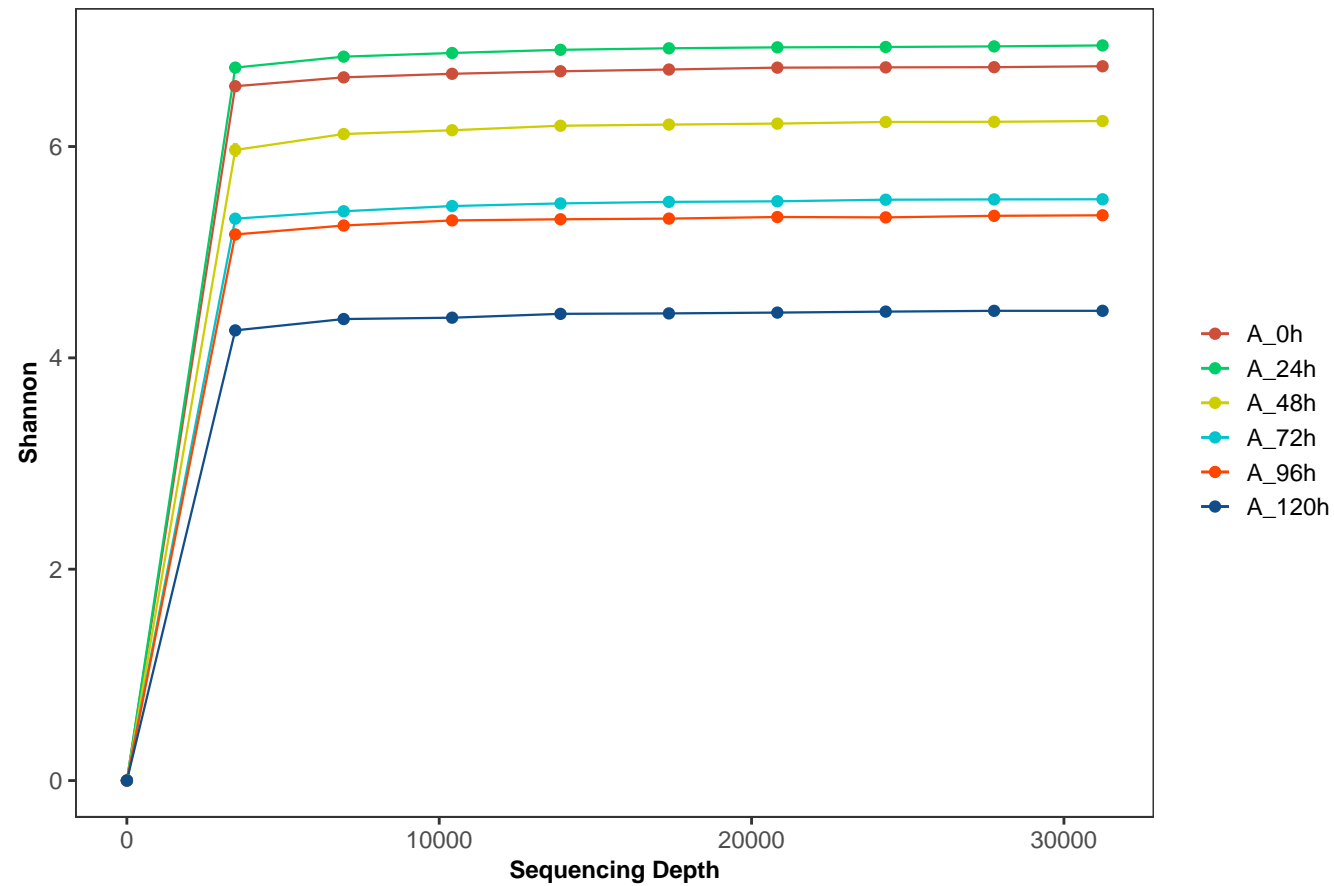

Supplement: Raw_data_3.zip [file 24 48Shannon_rare_curve_errorbar.group.pdf › Raw data 3 Structural of microbial communities/24 48Shannon_rare_curve_errorbar.group.pdf]

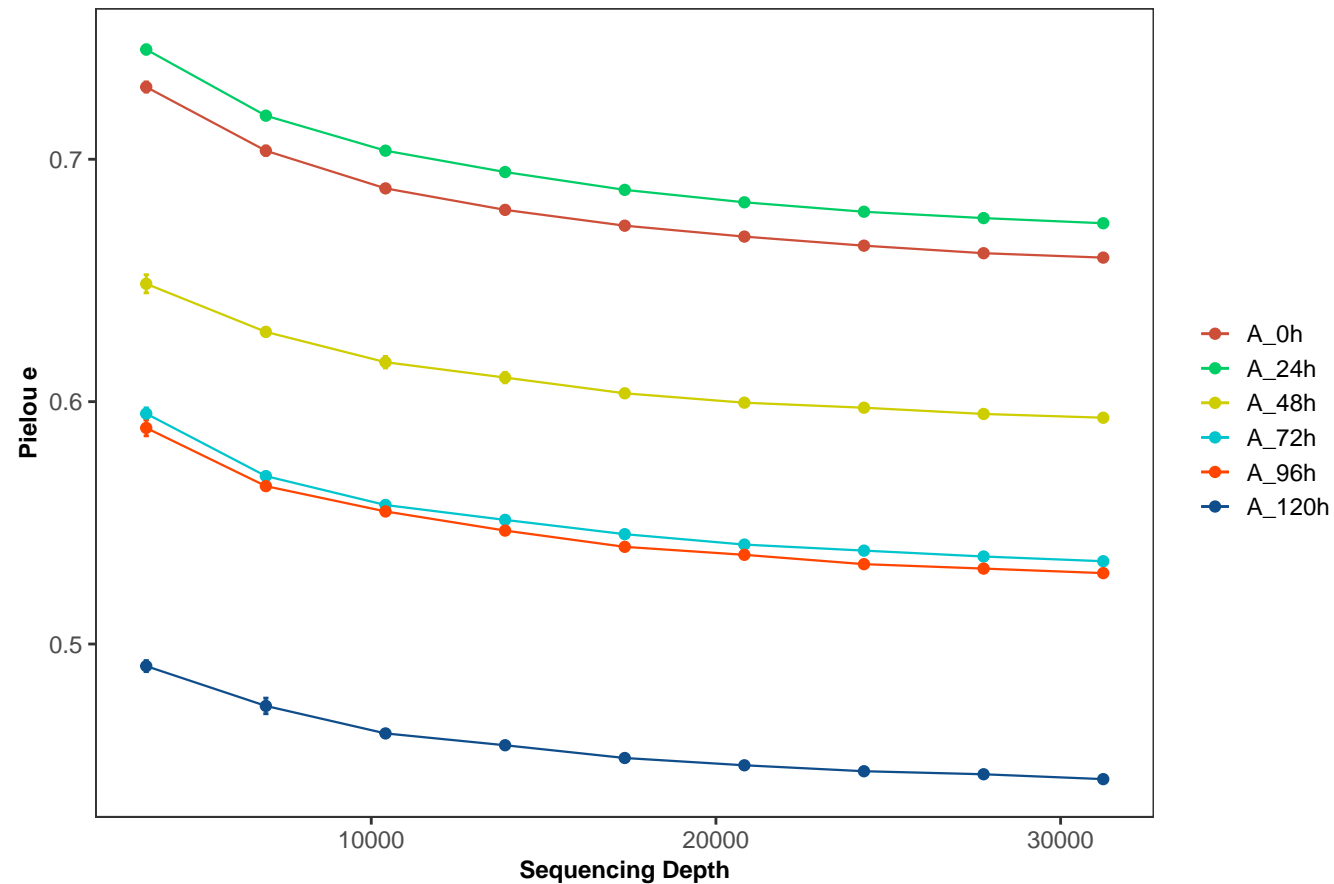

Supplement: Raw_data_3.zip [file 24 Pielou_e_rare_curve_errorbar.group.pdf › Raw data 3 Structural of microbial communities/24 Pielou_e_rare_curve_errorbar.group.pdf]

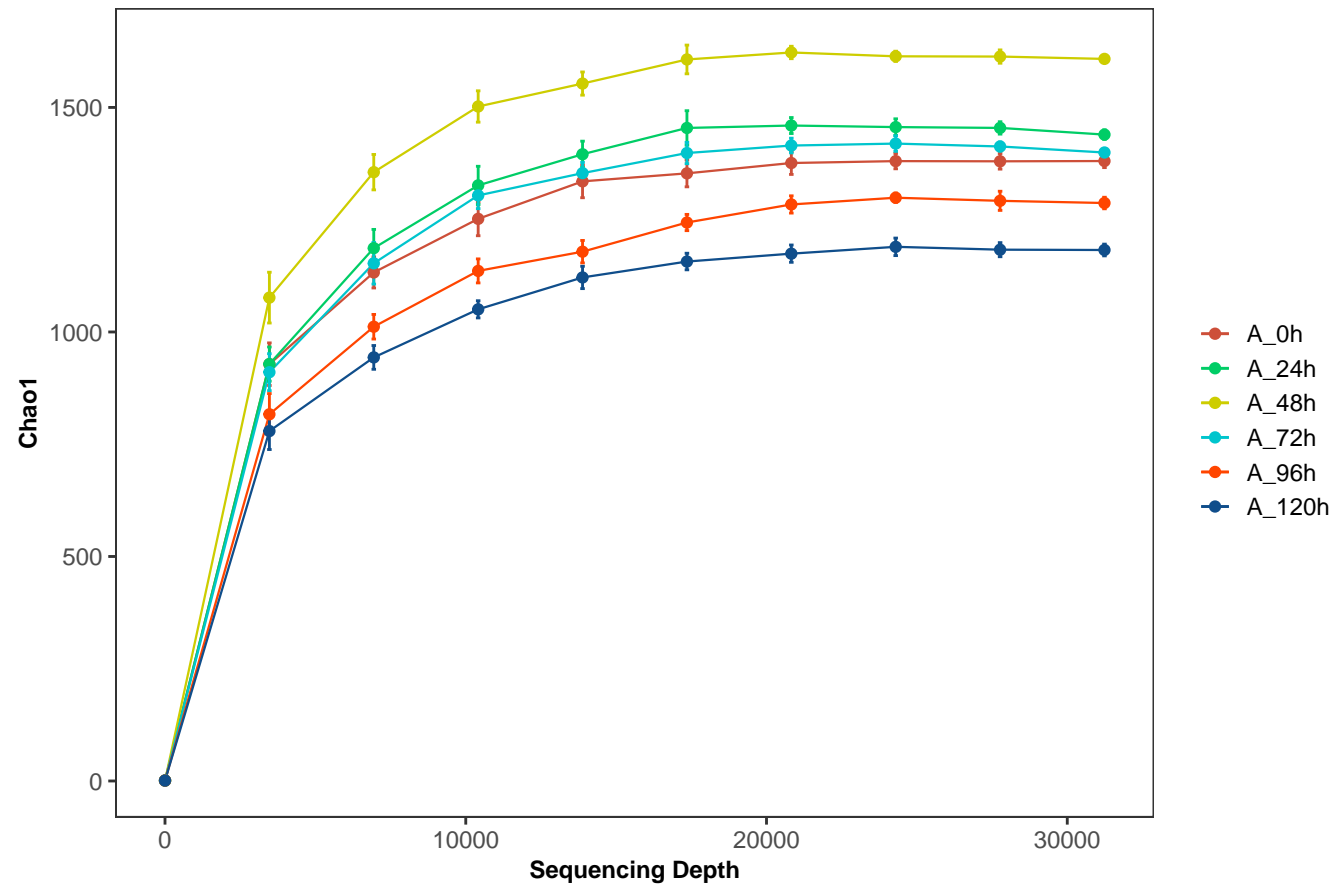

Supplement: Raw_data_3.zip [file 48Chao1_rare_curve_errorbar.group.pdf › Raw data 3 Structural of microbial communities/48Chao1_rare_curve_errorbar.group.pdf]

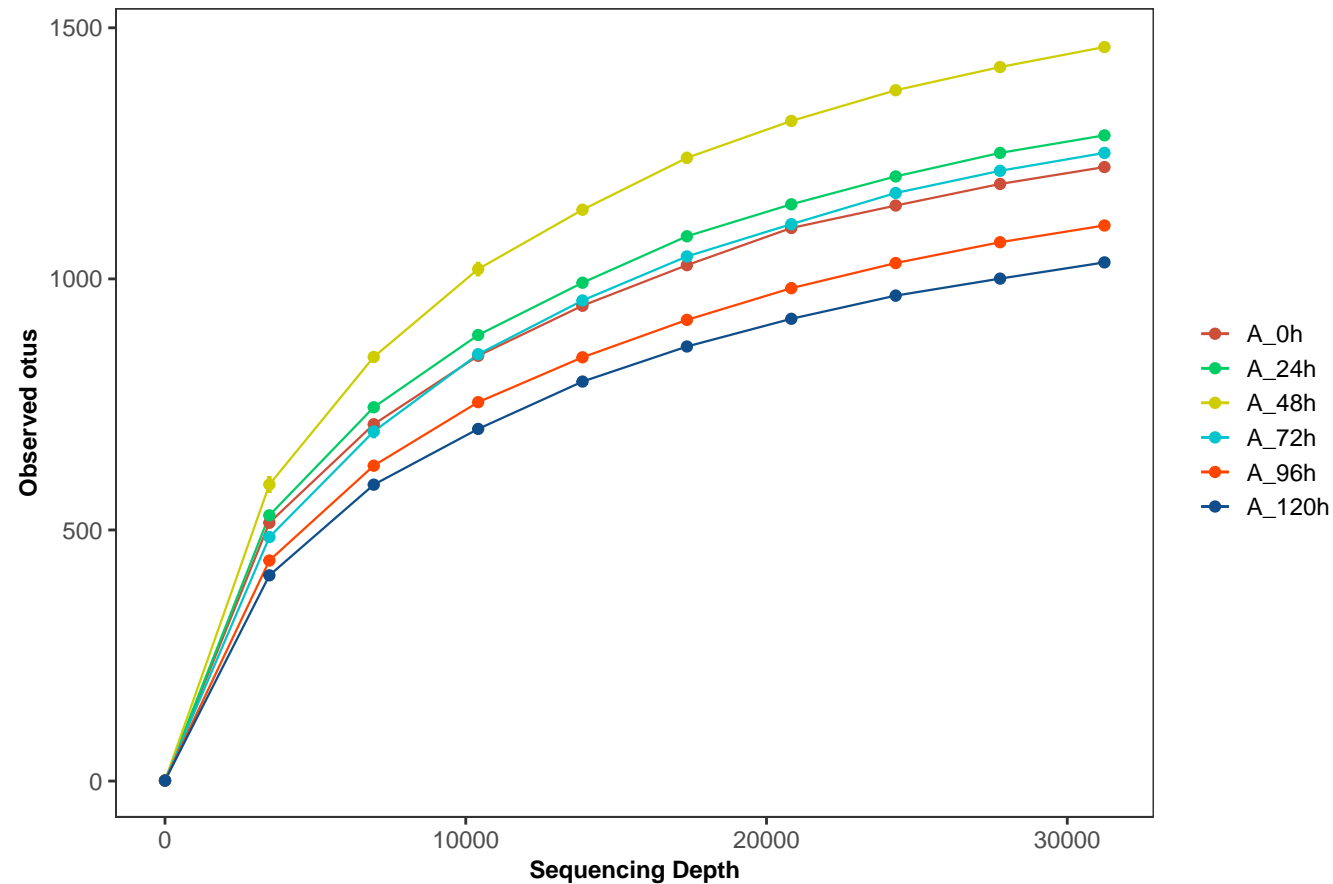

Supplement: Raw_data_3.zip [file 48Observed_otus_rare_curve_errorbar.group.pdf › Raw data 3 Structural of microbial communities/48Observed_otus_rare_curve_errorbar.group.pdf]

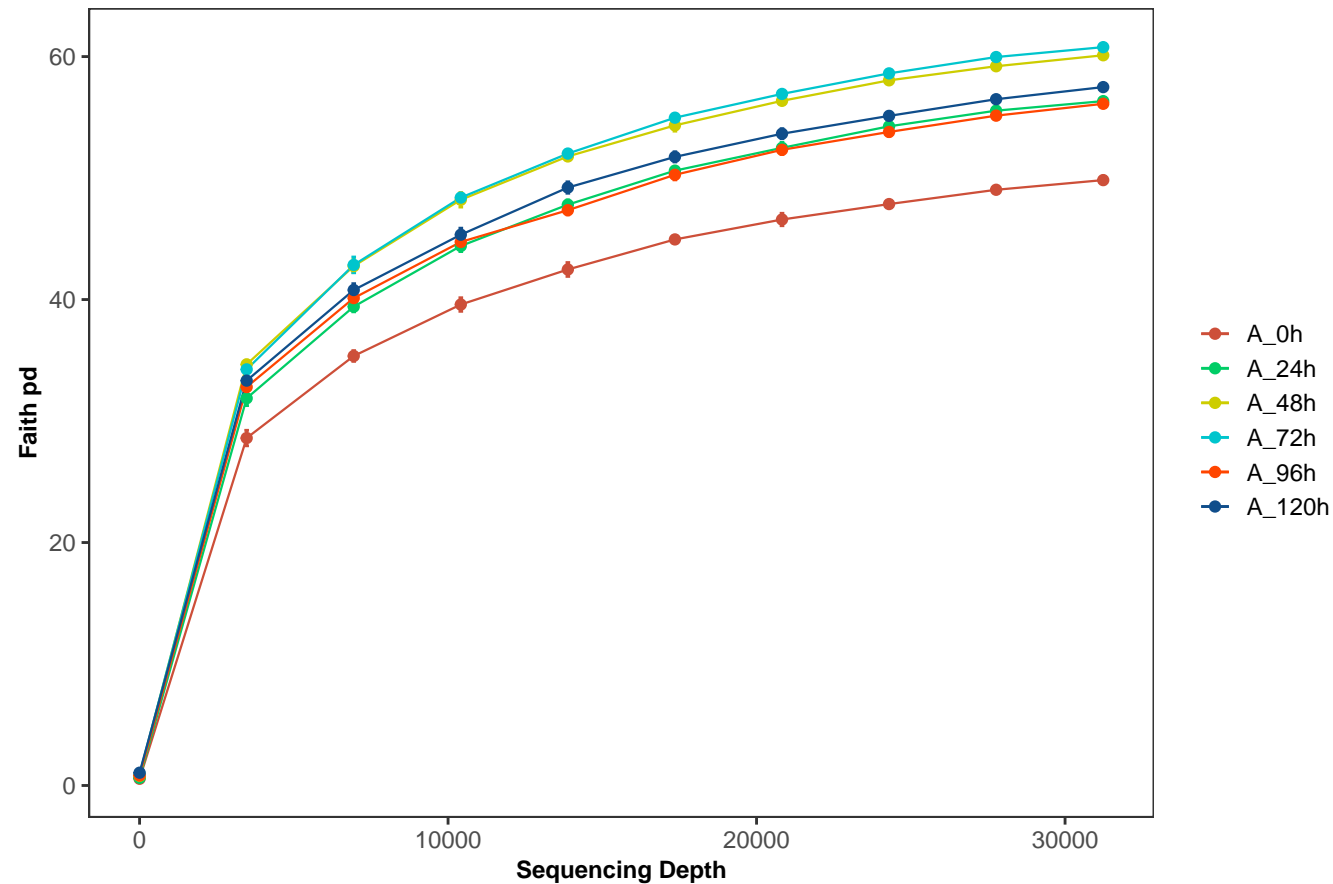

Supplement: Raw_data_3.zip [file 72 48 Faith_pd_rare_curve_errorbar.group.pdf › Raw data 3 Structural of microbial communities/72 48 Faith_pd_rare_curve_errorbar.group.pdf]

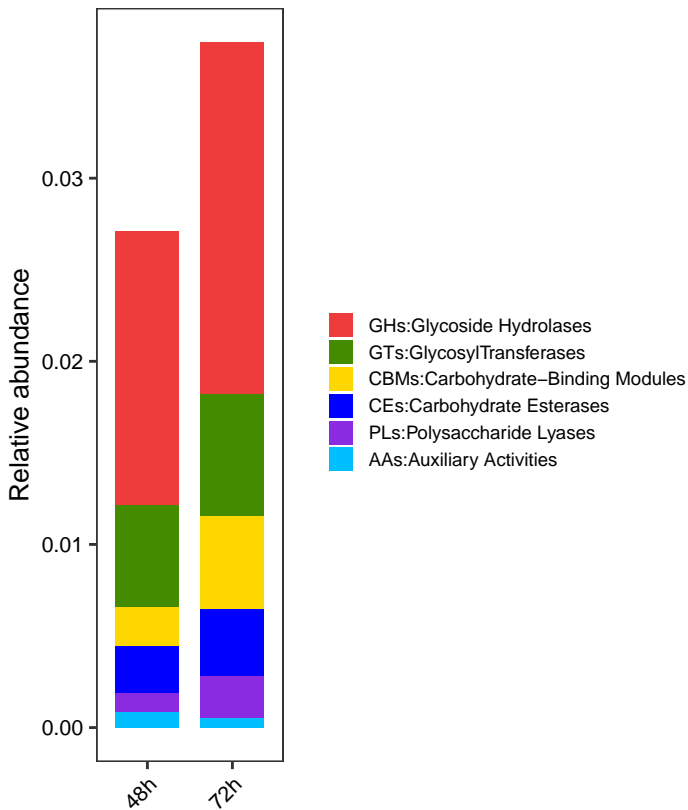

Supplement: Raw_data_3.zip [file CAZy.pdf › Raw data 3 Structural of microbial communities/CAZy.pdf]

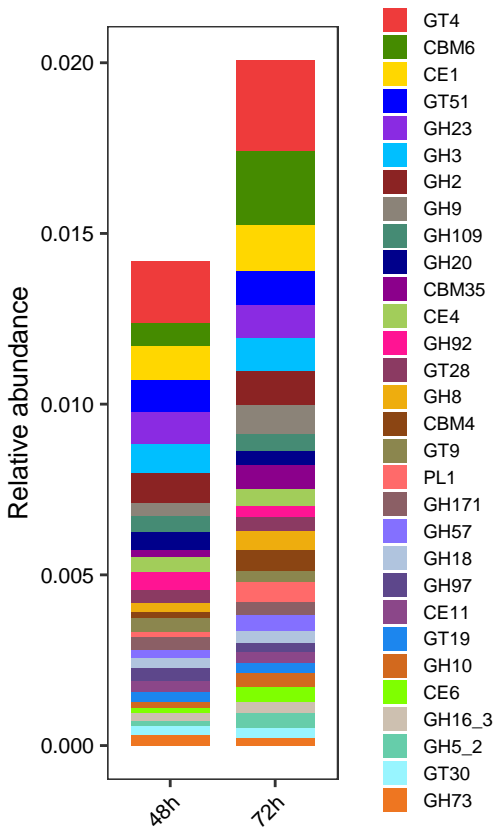

Supplement: Raw_data_3.zip [file CAZytop30.pdf › Raw data 3 Structural of microbial communities/CAZytop30.pdf]

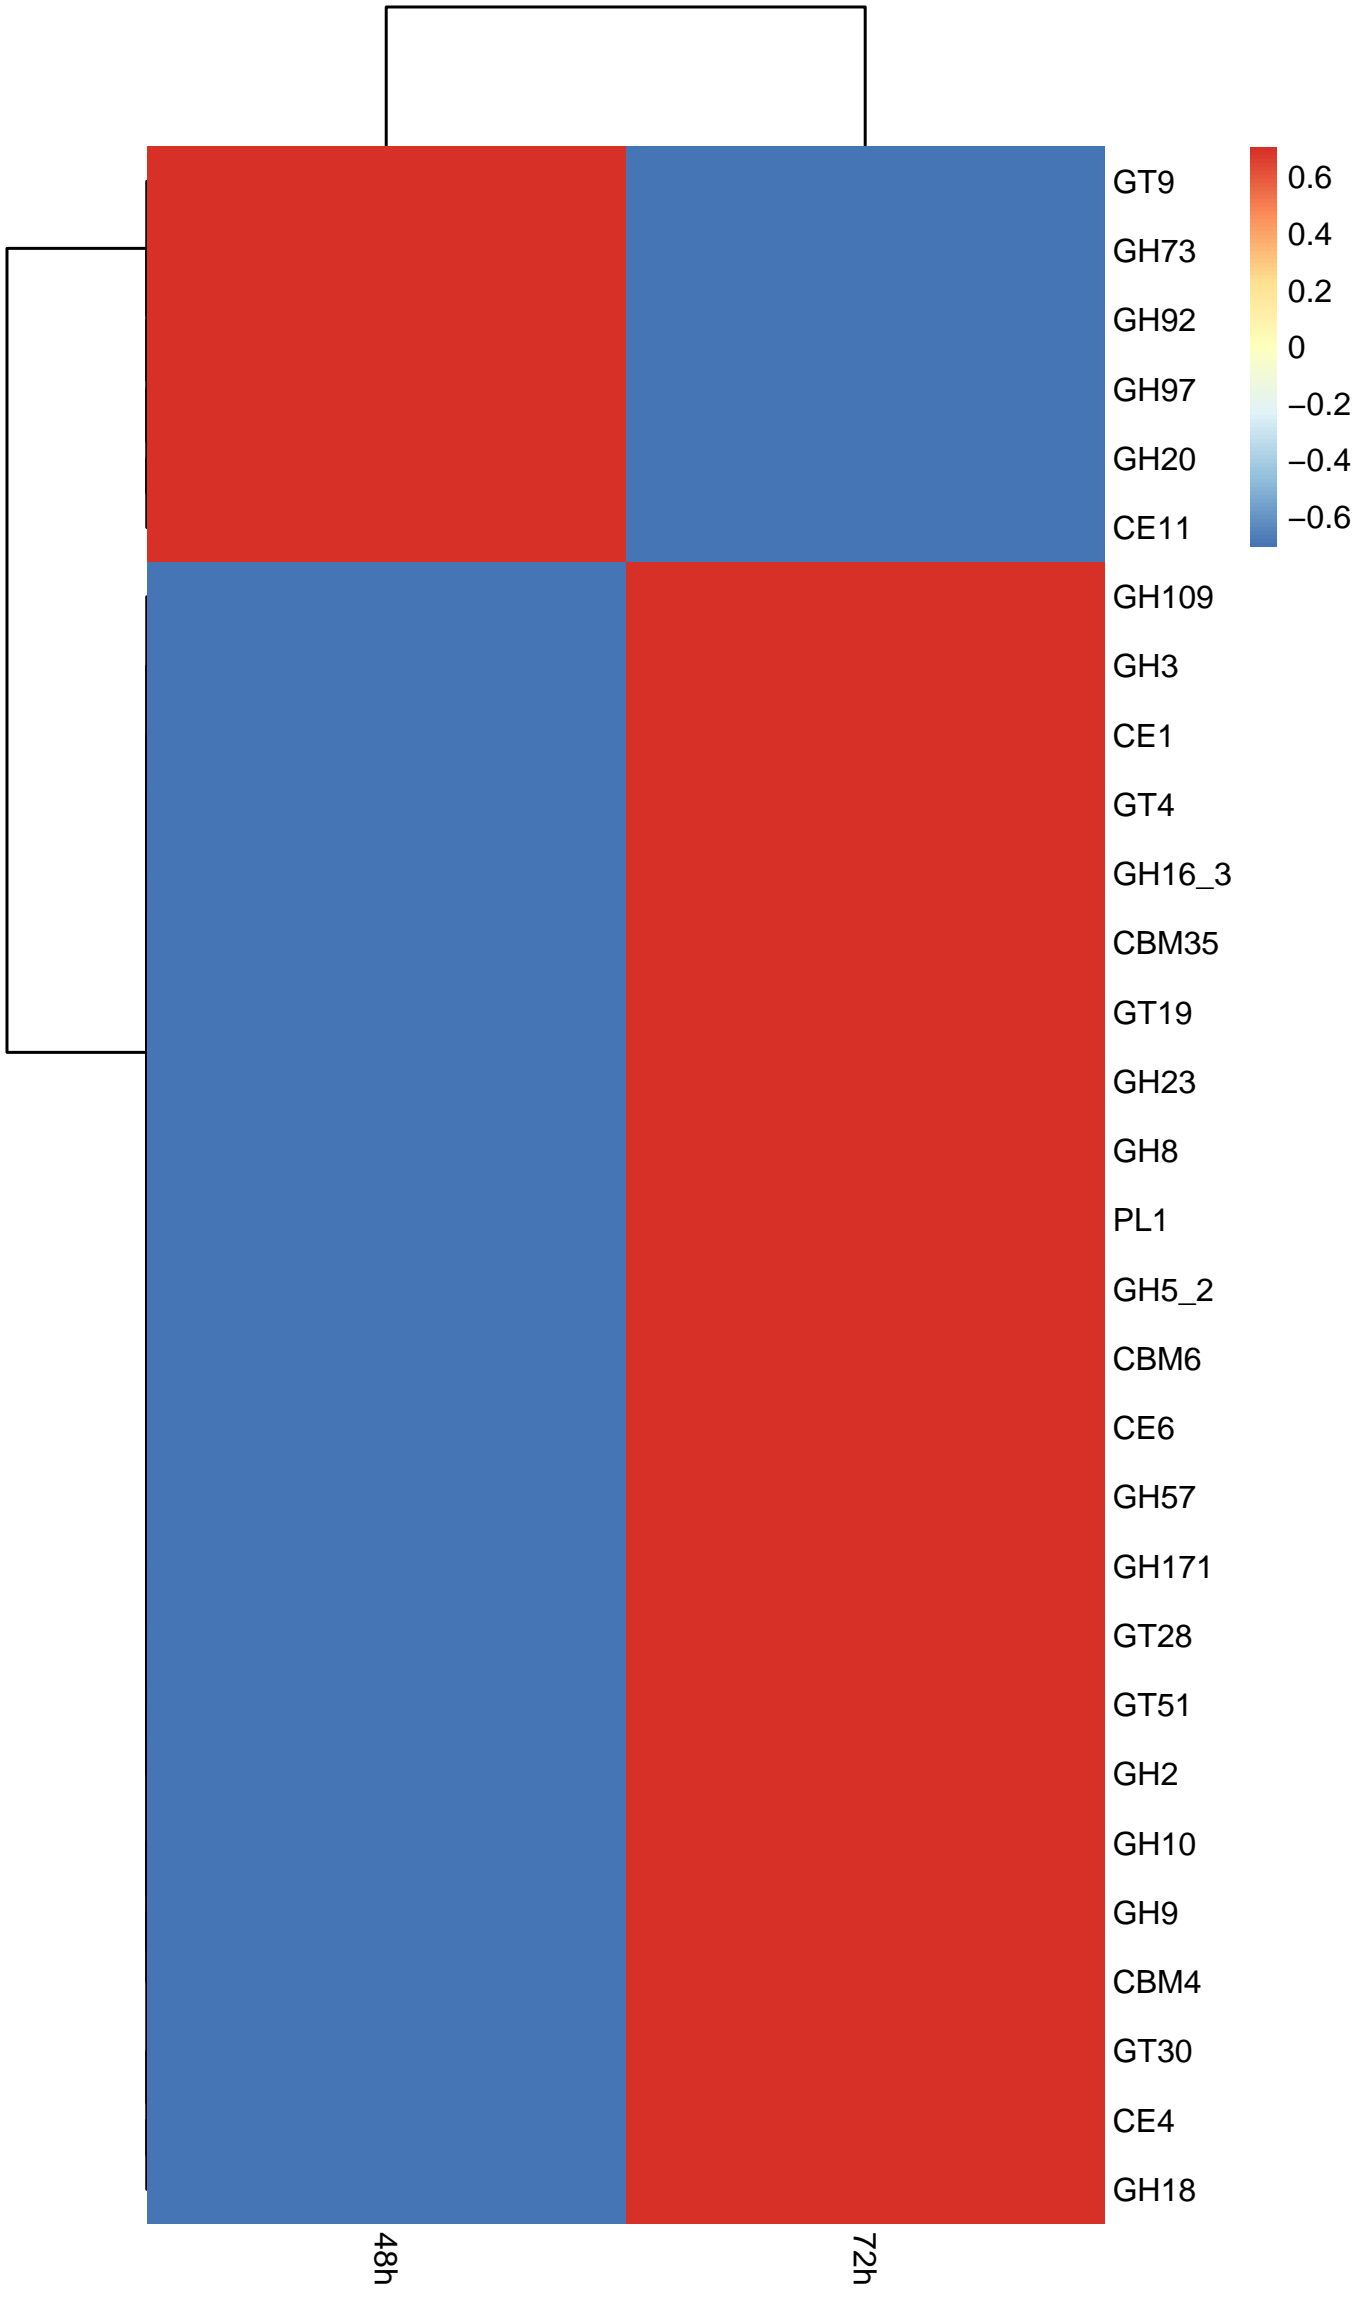

Supplement: Raw_data_3.zip [file Group.CAZy.family.TPM.top30.heatmap.pdf › Raw data 3 Structural of microbial communities/Group.CAZy.family.TPM.top30.heatmap.pdf]

48h

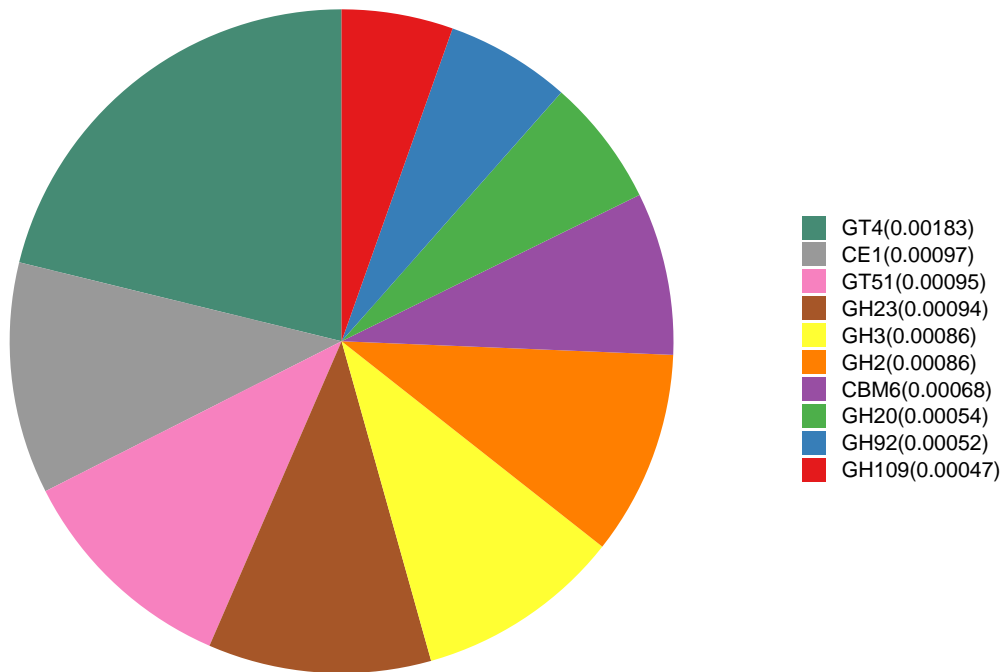

Supplement: Raw_data_3.zip [file Group.CAZy.family.percentage.top10.pie.48h.pdf › Raw data 3 Structural of microbial communities/Group.CAZy.family.percentage.top10.pie.48h.pdf]

72h

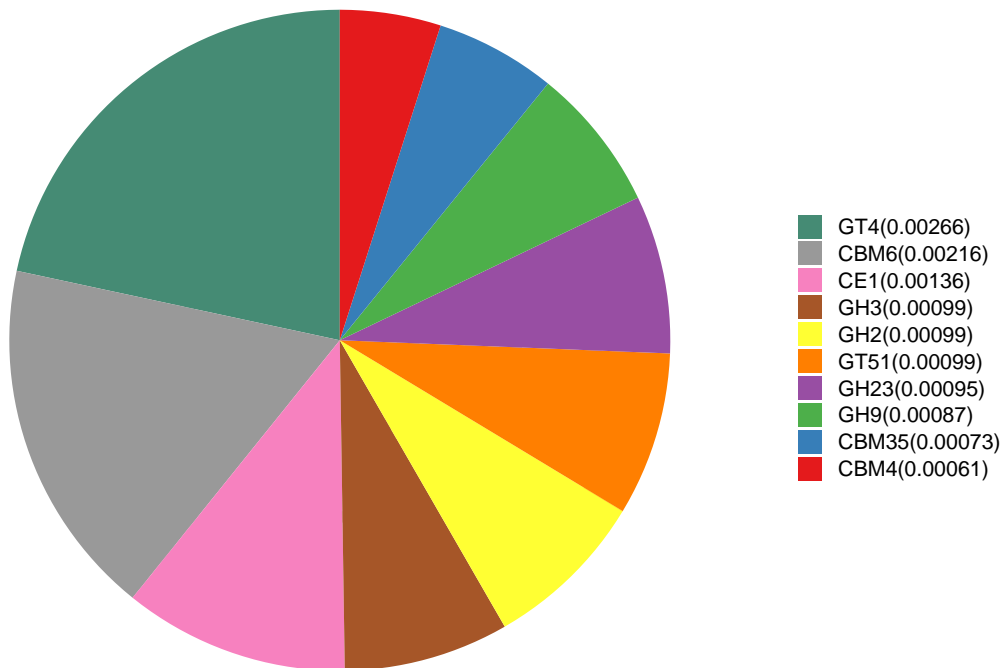

Supplement: Raw_data_3.zip [file Group.CAZy.family.percentage.top10.pie.72h.pdf › Raw data 3 Structural of microbial communities/Group.CAZy.family.percentage.top10.pie.72h.pdf]

48h

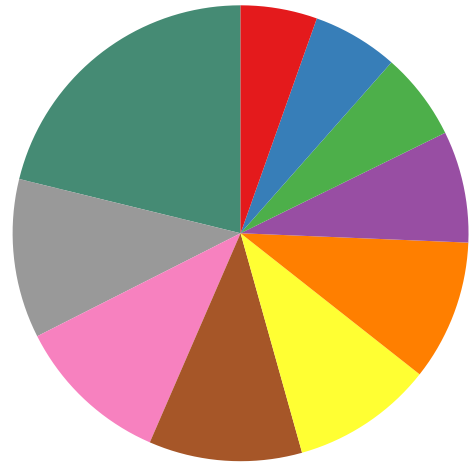

GT4(0.00183)  
CE1(0.00097)  
GT51(0.00095)  
GH23(0.00094)  
GH3(0.00086)  
GH2(0.00086)  
CBM6(0.00068)  
GH20(0.00054)  
GH92(0.00052)  
GH109(0.00047)

72h

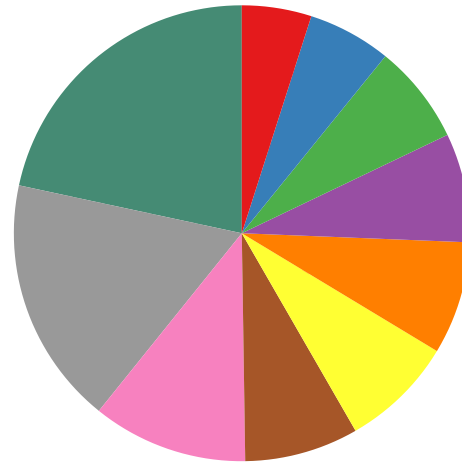

GT4(0.00266)  
CBM6(0.00216)  
CE1(0.00136)  
GH3(0.00099)  
GH2(0.00099)  
GT51(0.00099)  
GH23(0.00095)  
GH9(0.00087)  
CBM35(0.00073)  
CBM4(0.00061)

Supplement: Raw_data_3.zip [file Group.CAZy.family.percentage.top10.pie.all.pdf › Raw data 3 Structural of microbial communities/Group.CAZy.family.percentage.top10.pie.all.pdf]

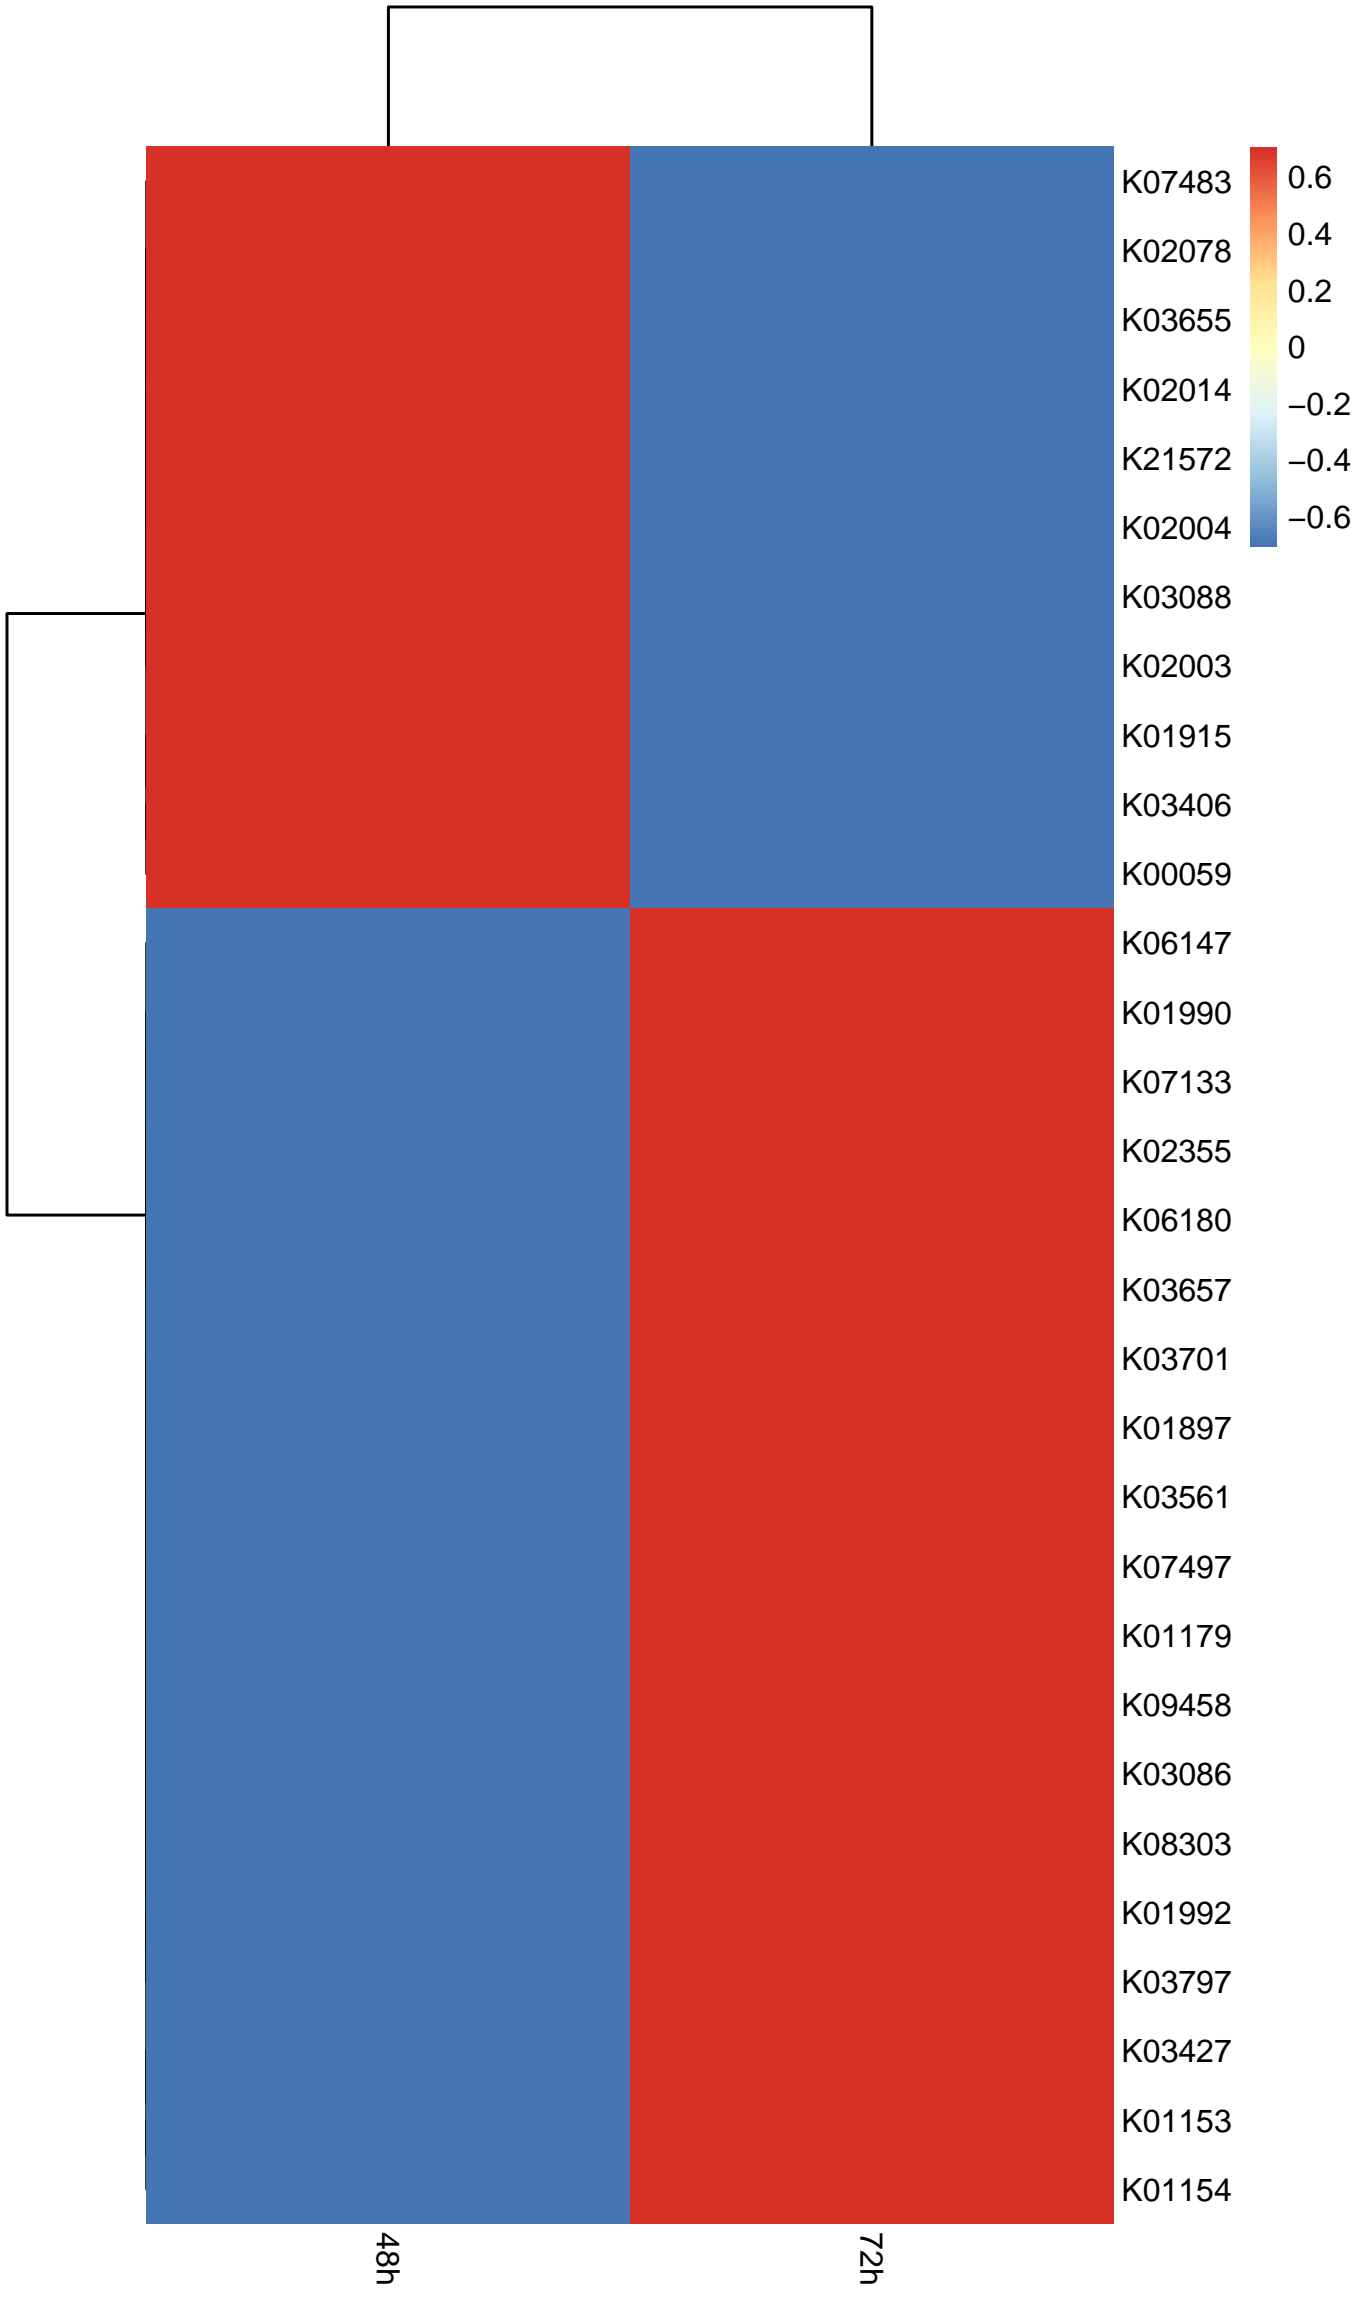

Supplement: Raw_data_3.zip [file Group.KEGG.KO.TPM.top30.heatmap.pdf › Raw data 3 Structural of microbial communities/Group.KEGG.KO.TPM.top30.heatmap.pdf]

48h

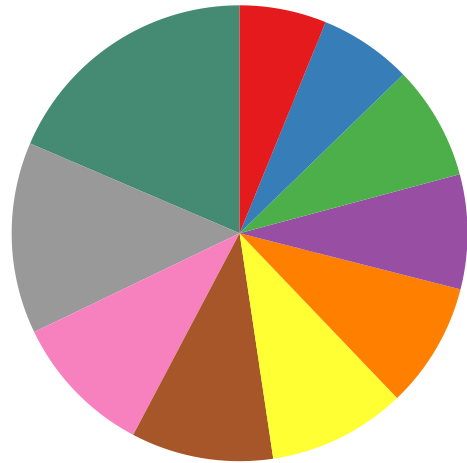

K21572(0.00316)  
K03406(0.00231)  
K03088(0.00173)  
K01992(0.00172)  
K07497(0.00167)  
K01990(0.00152)  
K07133(0.00138)  
K02004(0.00138)  
K02014(0.00112)  
K00059(0.00105)

72h

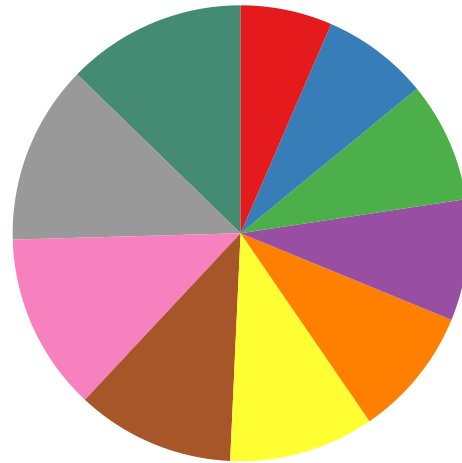

K21572(0.00226)  
K07497(0.00226)  
K01179(0.00224)  
K03406(0.002)  
K01992(0.00183)  
K01990(0.00164)  
K07133(0.00153)  
K03088(0.00152)  
K02004(0.00135)  
K03427(0.00116)

Supplement: Raw_data_3.zip [file Group.KEGG.KO.percentage.top10.pie.all.pdf › Raw data 3 Structural of microbial communities/Group.KEGG.KO.percentage.top10.pie.all.pdf]

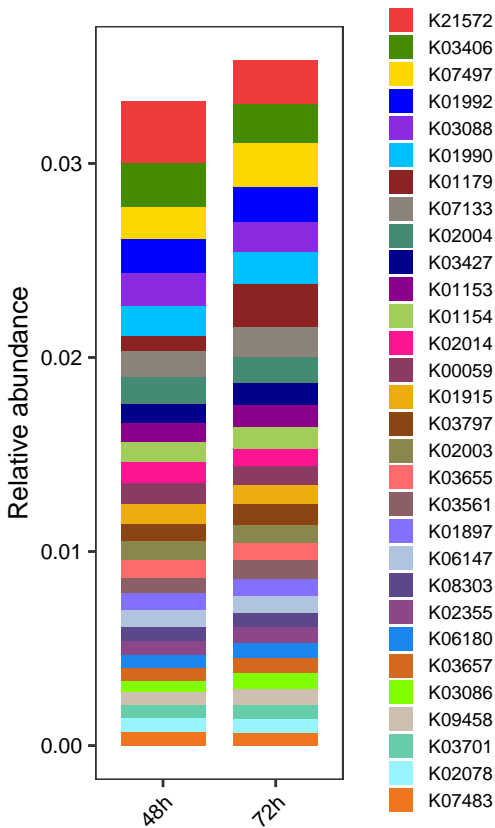

Supplement: Raw_data_3.zip [file Group.KEGG.KO.percentage.top30.histogram.pdf › Raw data 3 Structural of microbial communities/Group.KEGG.KO.percentage.top30.histogram.pdf]

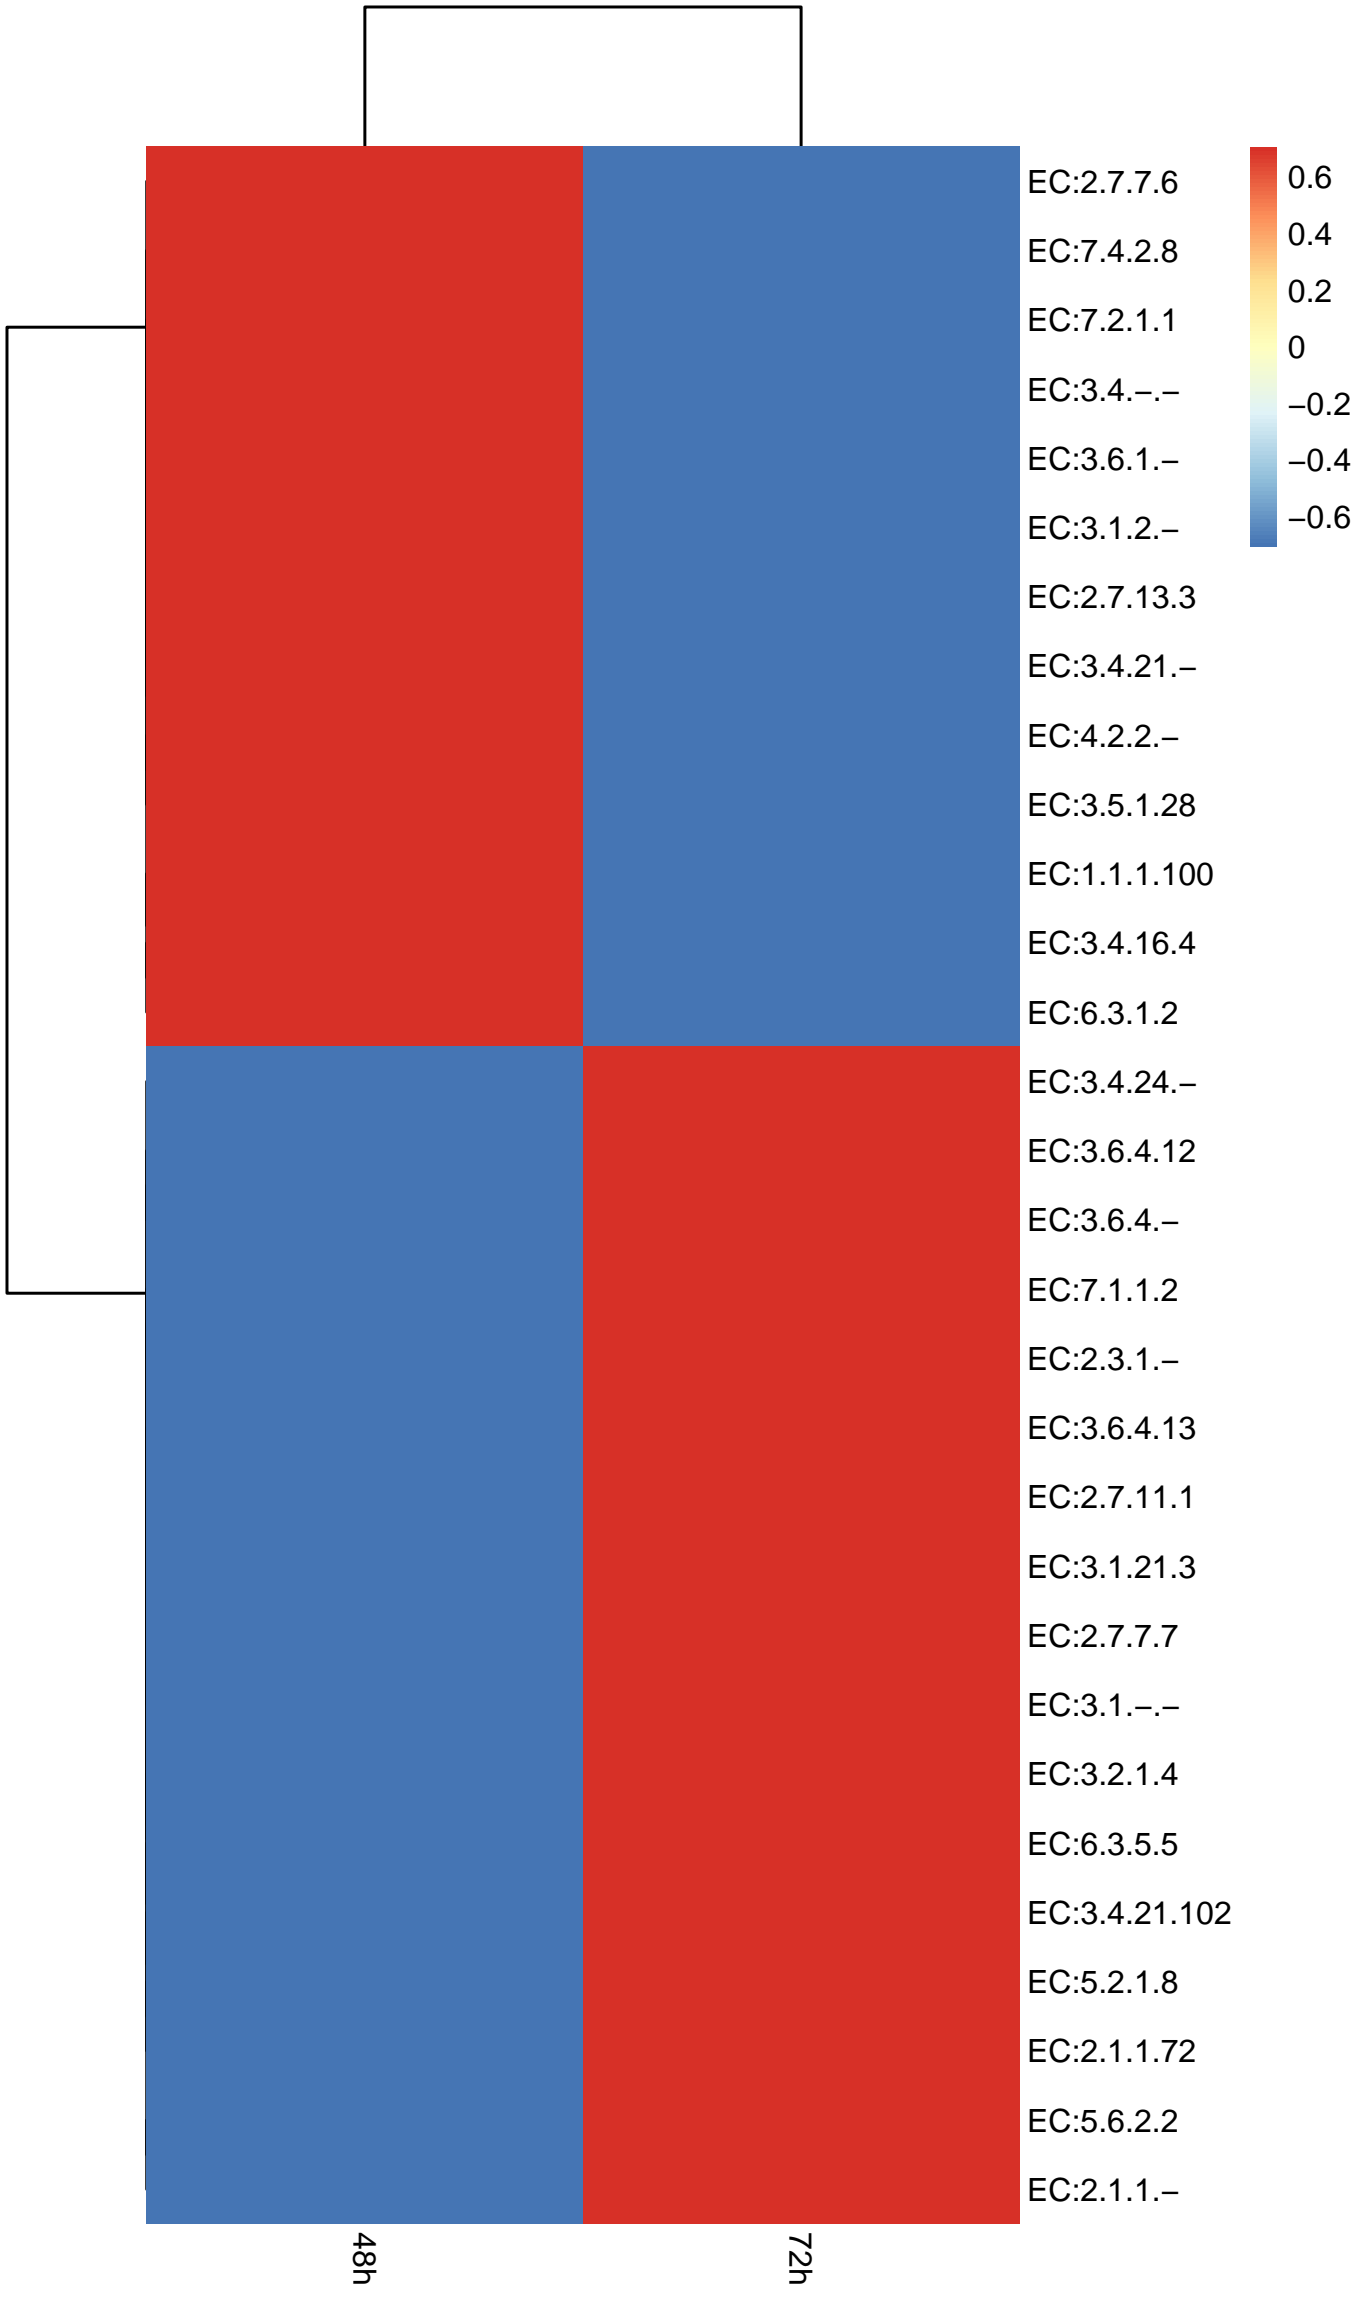

Supplement: Raw_data_3.zip [file Group.KEGG.enzyme.TPM.top30.heatmap.pdf › Raw data 3 Structural of microbial communities/Group.KEGG.enzyme.TPM.top30.heatmap.pdf]

48h

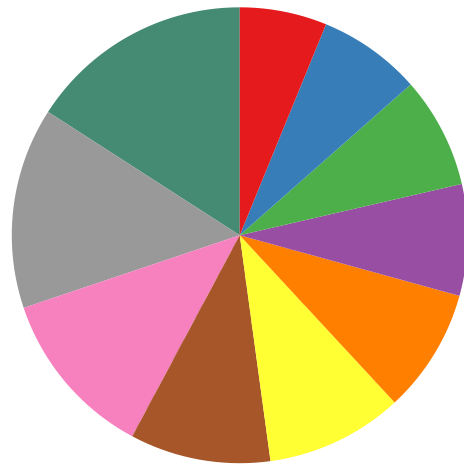

EC:3.6.4.12(0.00389)  
EC:2.7.7.7(0.00349)  
EC:2.7.13.3(0.00294)  
EC:5.2.1.8(0.00244)  
EC:3.1.--(0.00238)  
EC:7.1.1.2(0.00216)  
EC:3.4.16.4(0.00193)  
EC:3.1.21.3(0.00193)  
EC:3.4.24.--(0.00179)  
EC:2.7.7.6(0.00151)

72h

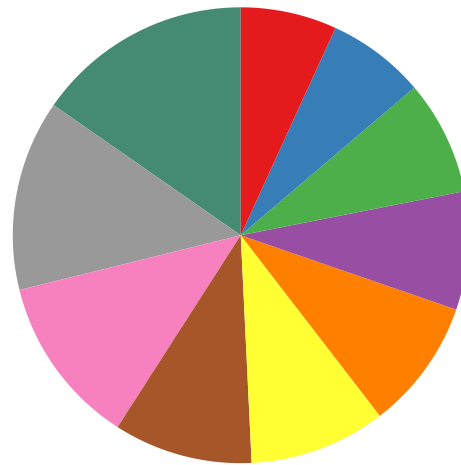

EC:3.6.4.12(0.00406)  
EC:2.7.7.7(0.00359)  
EC:7.1.1.2(0.0032)  
EC:3.1.--(0.00261)  
EC:5.2.1.8(0.00257)  
EC:2.7.13.3(0.00246)  
EC:3.2.1.4(0.00222)  
EC:3.1.21.3(0.00216)  
EC:3.4.16.4(0.00184)  
EC:3.4.24.--(0.00181)

Supplement: Raw_data_3.zip [file Group.KEGG.enzyme.percentage.top10.pie.all.pdf › Raw data 3 Structural of microbial communities/Group.KEGG.enzyme.percentage.top10.pie.all.pdf]

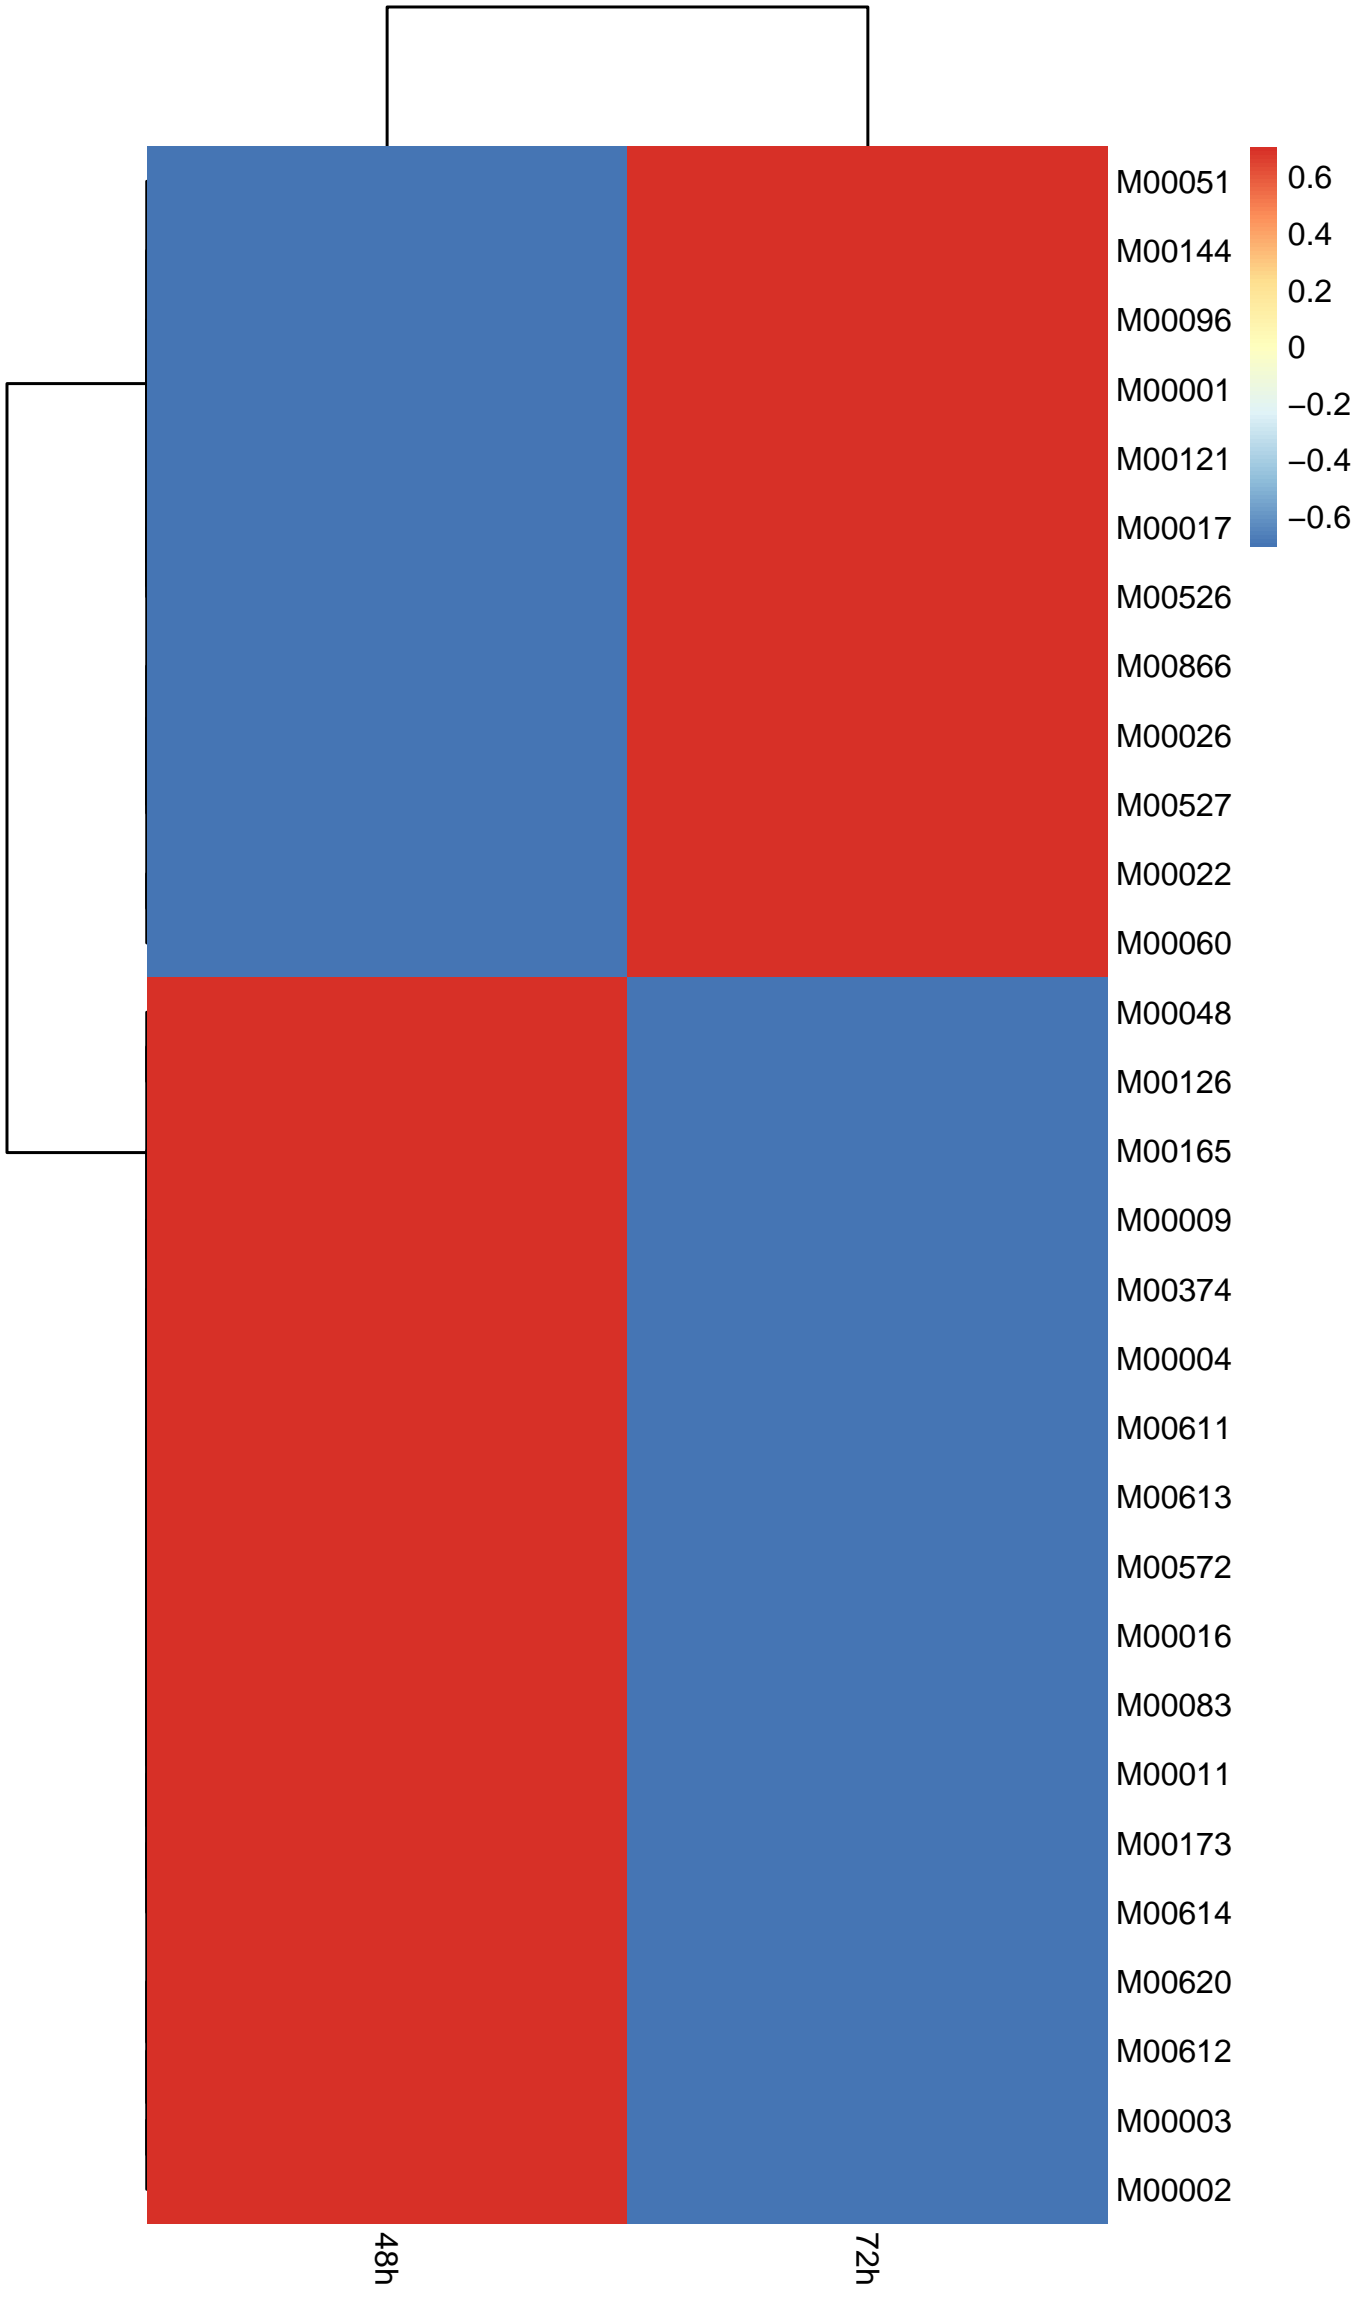

Supplement: Raw_data_3.zip [file Group.KEGG.module.TPM.top30.heatmap.pdf › Raw data 3 Structural of microbial communities/Group.KEGG.module.TPM.top30.heatmap.pdf]

48h

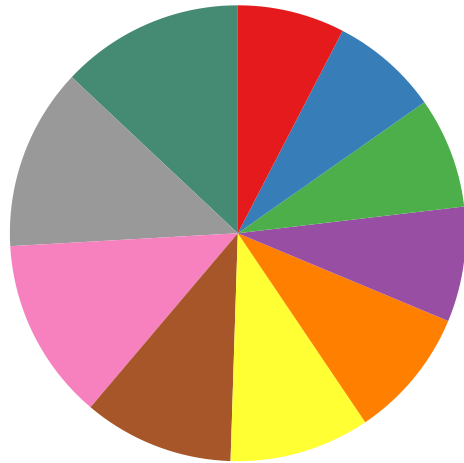

M00009(0.00485)  
M00614(0.00482)  
M00173(0.00482)  
M00011(0.00398)  
M00001(0.00371)  
M00048(0.00346)  
M00003(0.00305)  
M00083(0.00294)  
M00051(0.00286)  
M00016(0.00284)

72h

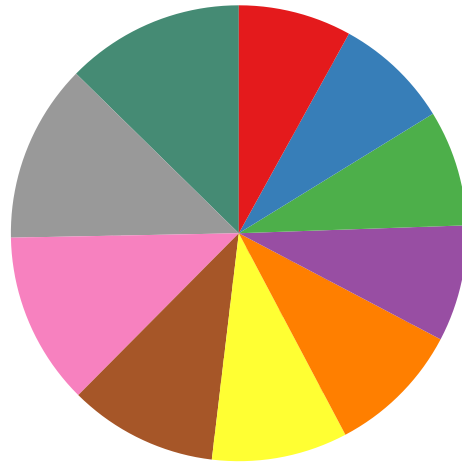

M00173(0.0045)  
M00614(0.0045)  
M00009(0.00435)  
M00001(0.00375)  
M00048(0.00342)  
M00011(0.00339)  
M00083(0.00293)  
M00003(0.00292)  
M00051(0.00291)  
M00026(0.00285)

Supplement: Raw_data_3.zip [file Group.KEGG.module.percentage.top10.pie.all.pdf › Raw data 3 Structural of microbial communities/Group.KEGG.module.percentage.top10.pie.all.pdf]

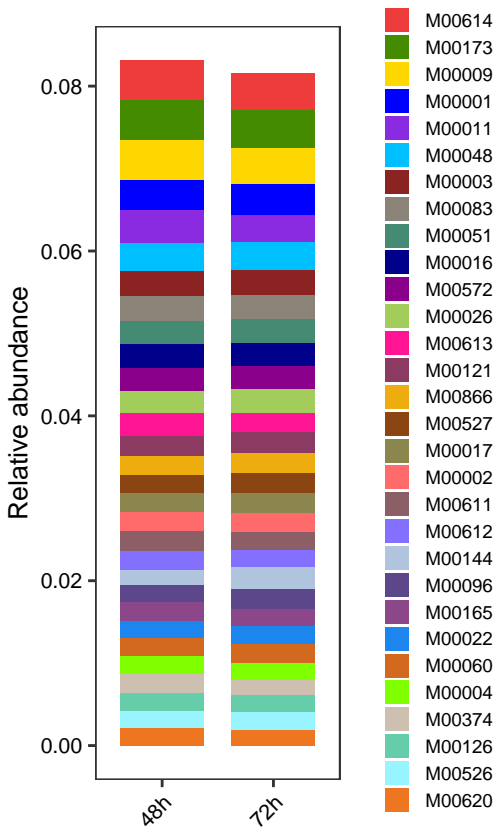

Supplement: Raw_data_3.zip [file Group.KEGG.module.percentage.top30.histogram.pdf › Raw data 3 Structural of microbial communities/Group.KEGG.module.percentage.top30.histogram.pdf]

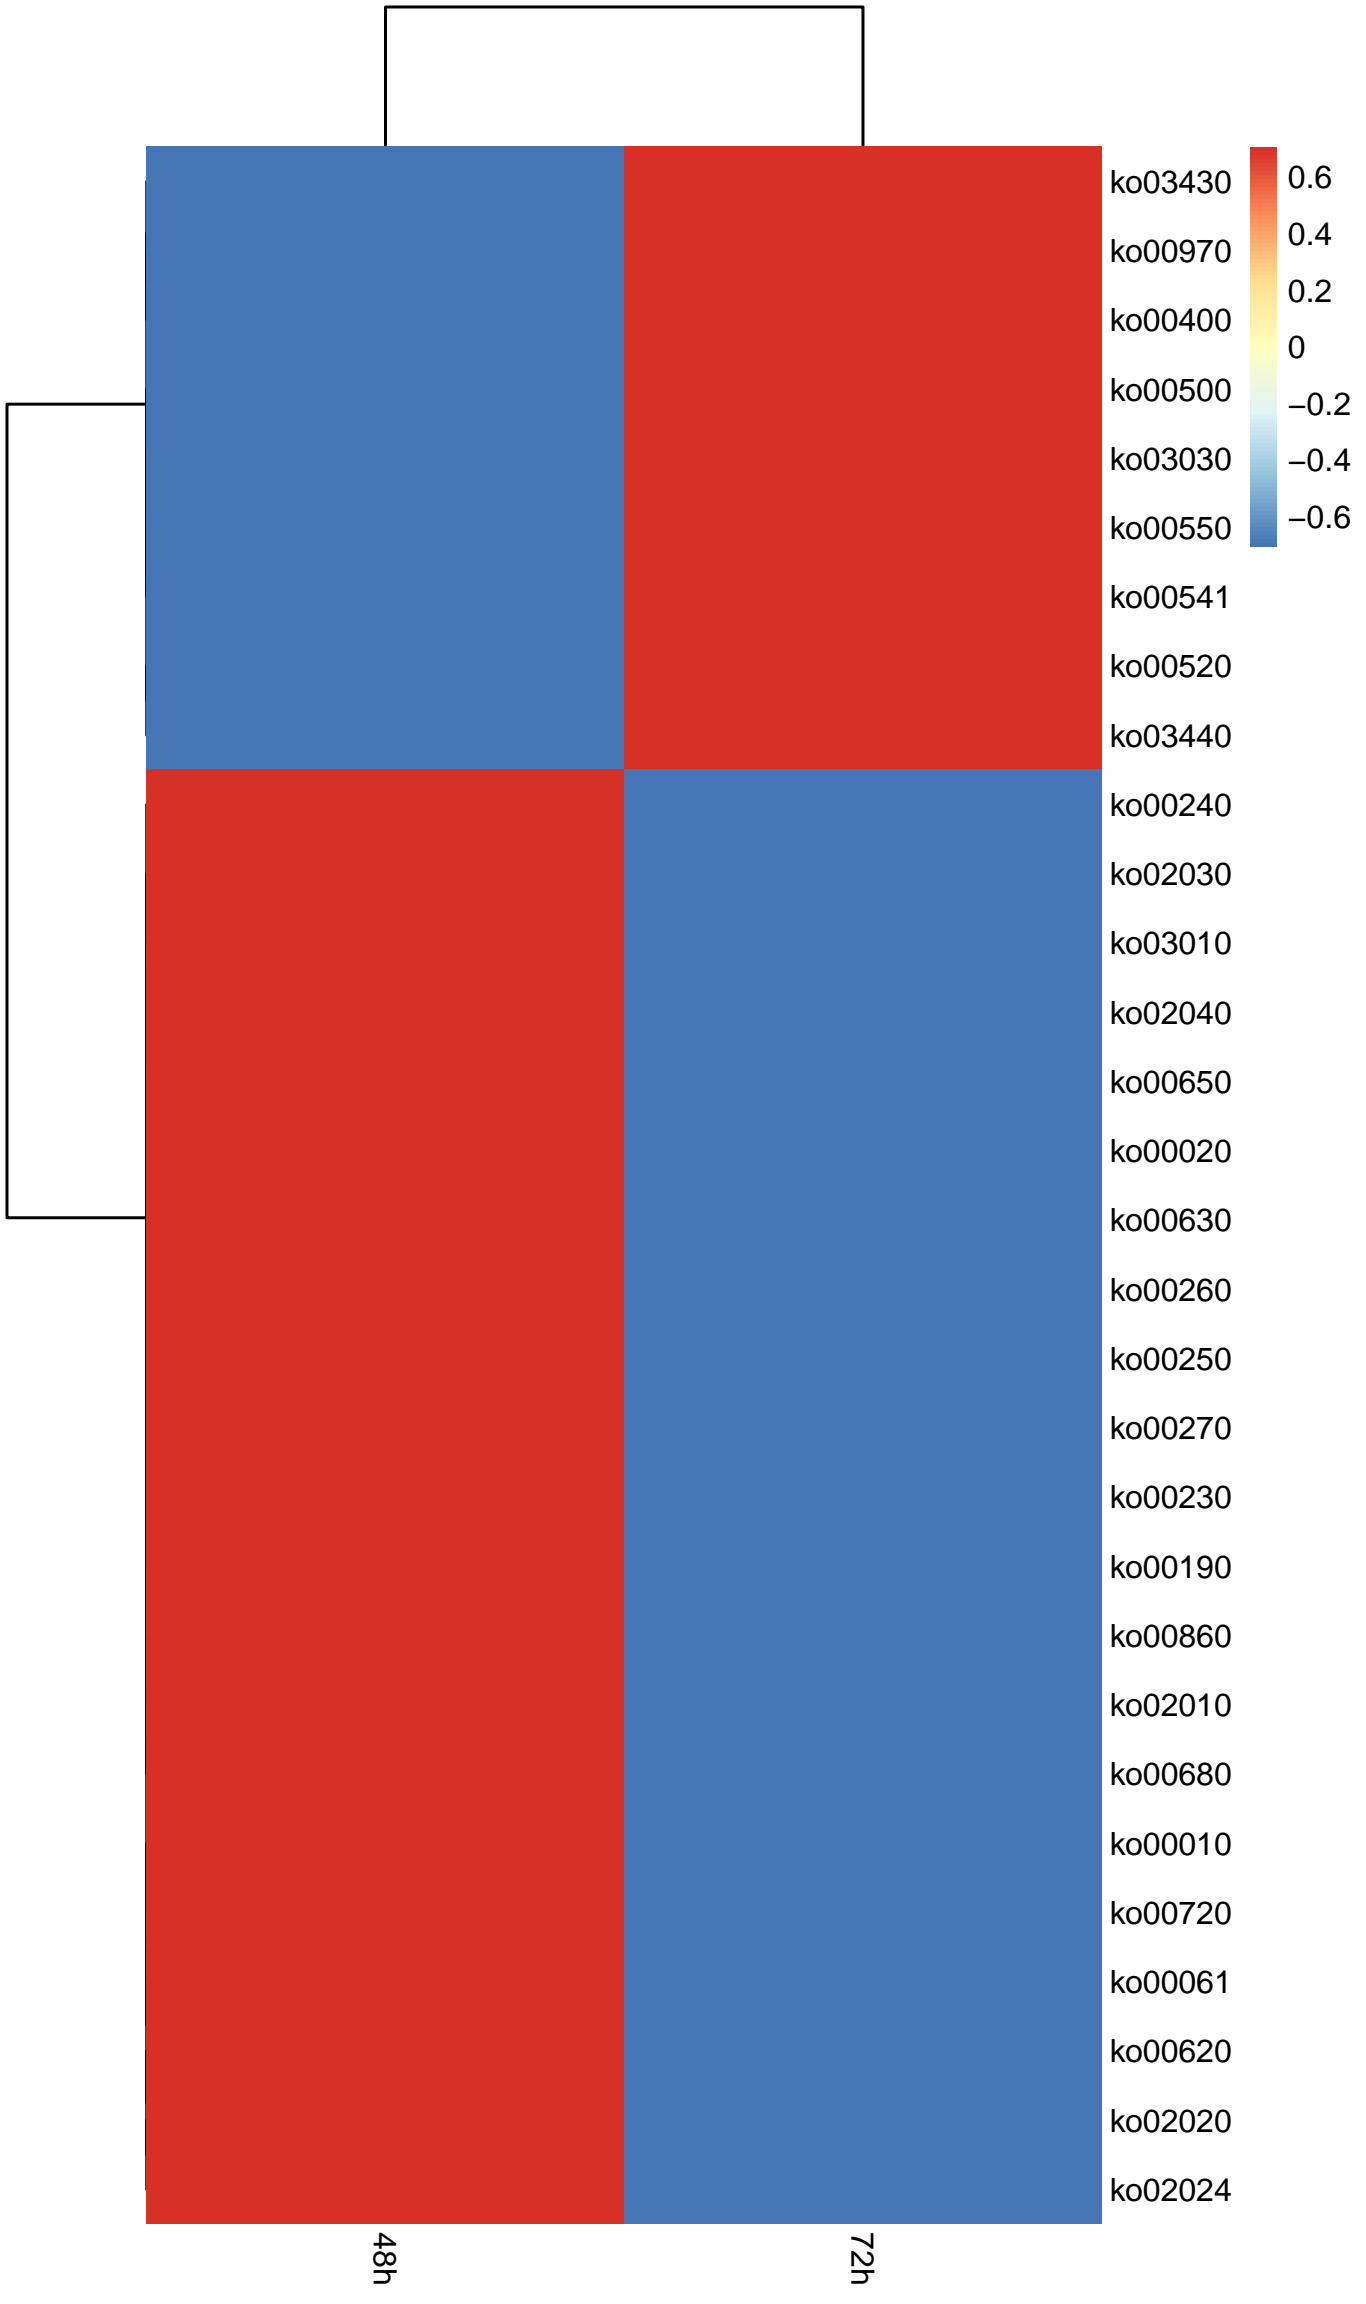

Supplement: Raw_data_3.zip [file Group.KEGG.pathway.TPM.top30.heatmap.pdf › Raw data 3 Structural of microbial communities/Group.KEGG.pathway.TPM.top30.heatmap.pdf]

48h

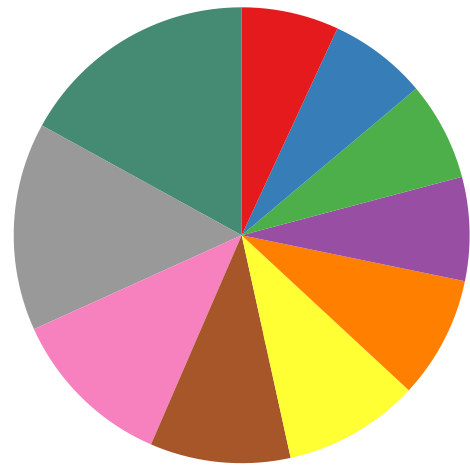

ko02020(0.01844)  
ko02010(0.01601)  
ko03010(0.01273)  
ko00230(0.0108)  
ko02024(0.01047)  
ko00620(0.00941)  
ko00190(0.00798)  
ko00520(0.00759)  
ko00270(0.00757)  
ko00240(0.00749)

72h

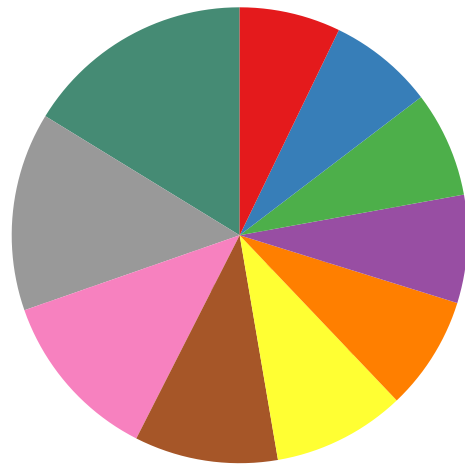

ko02020(0.01711)  
ko02010(0.01483)  
ko03010(0.01282)  
ko00230(0.01072)  
ko02024(0.00991)  
ko00620(0.00853)  
ko00520(0.00807)  
ko00190(0.0079)  
ko00970(0.00787)  
ko00240(0.00755)

Supplement: Raw_data_3.zip [file Group.KEGG.pathway.percentage.top10.pie.all.pdf › Raw data 3 Structural of microbial communities/Group.KEGG.pathway.percentage.top10.pie.all.pdf]

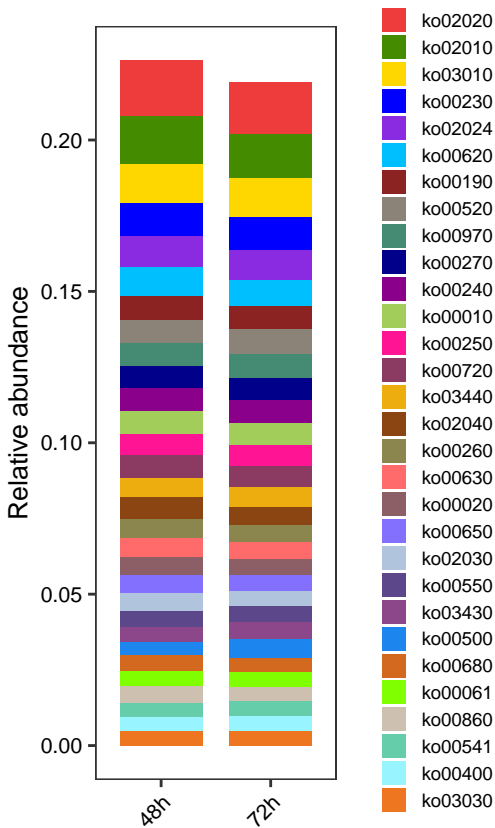

Supplement: Raw_data_3.zip [file Group.KEGG.pathway.percentage.top30.histogram.pdf › Raw data 3 Structural of microbial communities/Group.KEGG.pathway.percentage.top30.histogram.pdf]

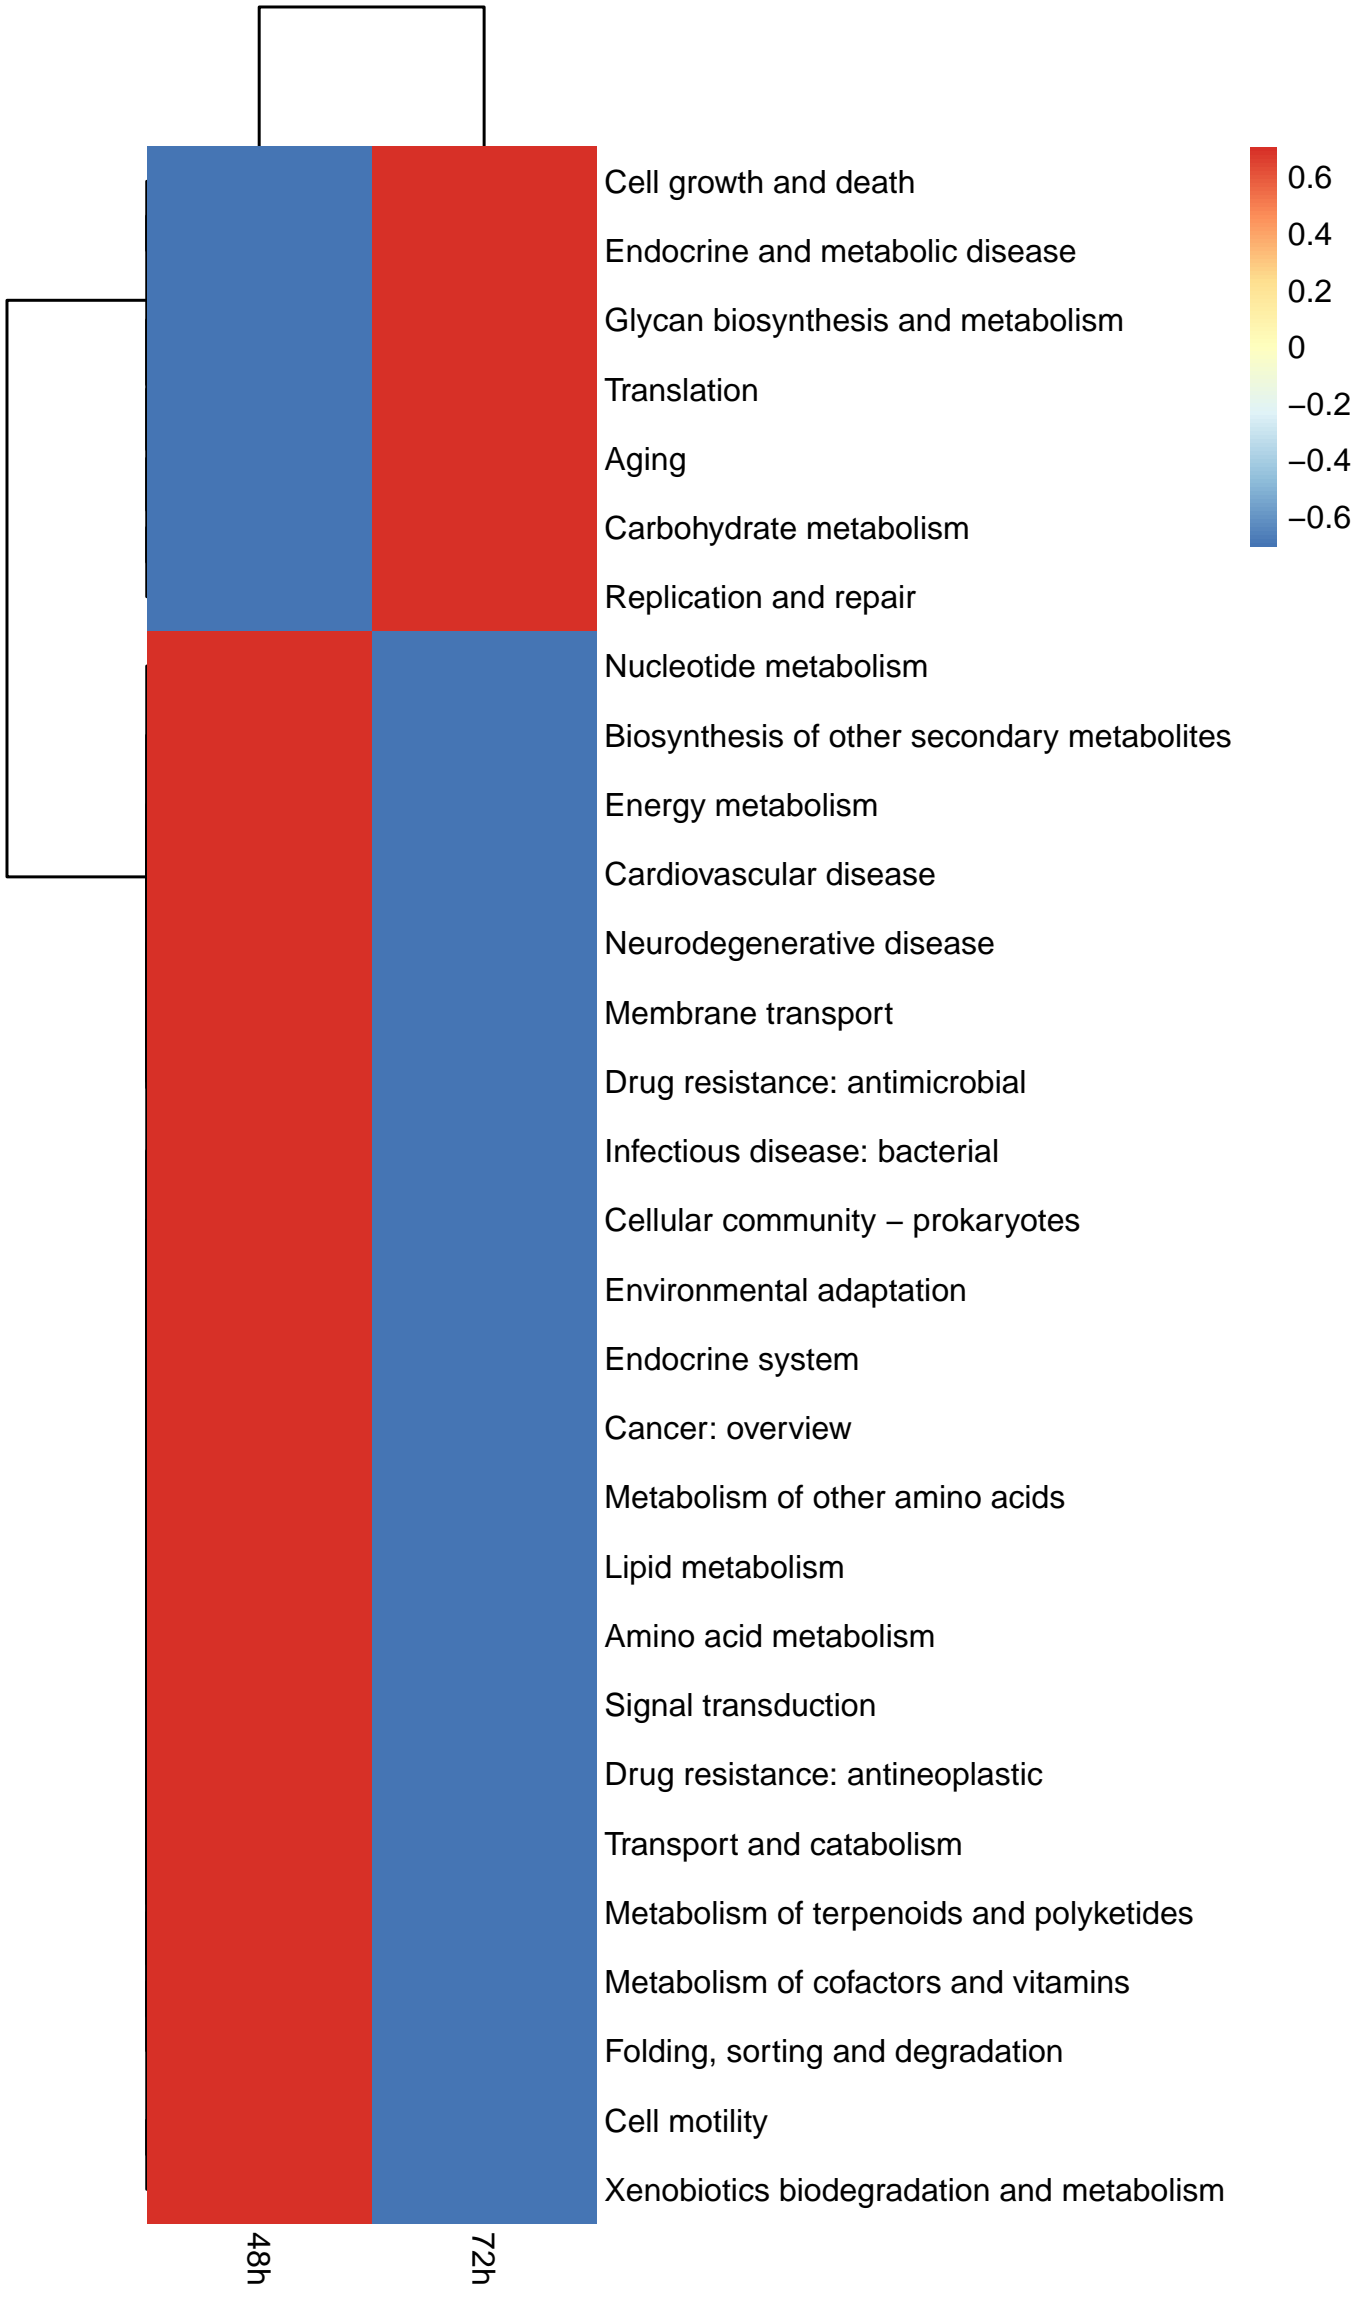

Supplement: Raw_data_3.zip [file Group.KEGG.pathway_hierarchy2.TPM.top30.heatmap.pdf › Raw data 3 Structural of microbial communities/Group.KEGG.pathway_hierarchy2.TPM.top30.heatmap.pdf]

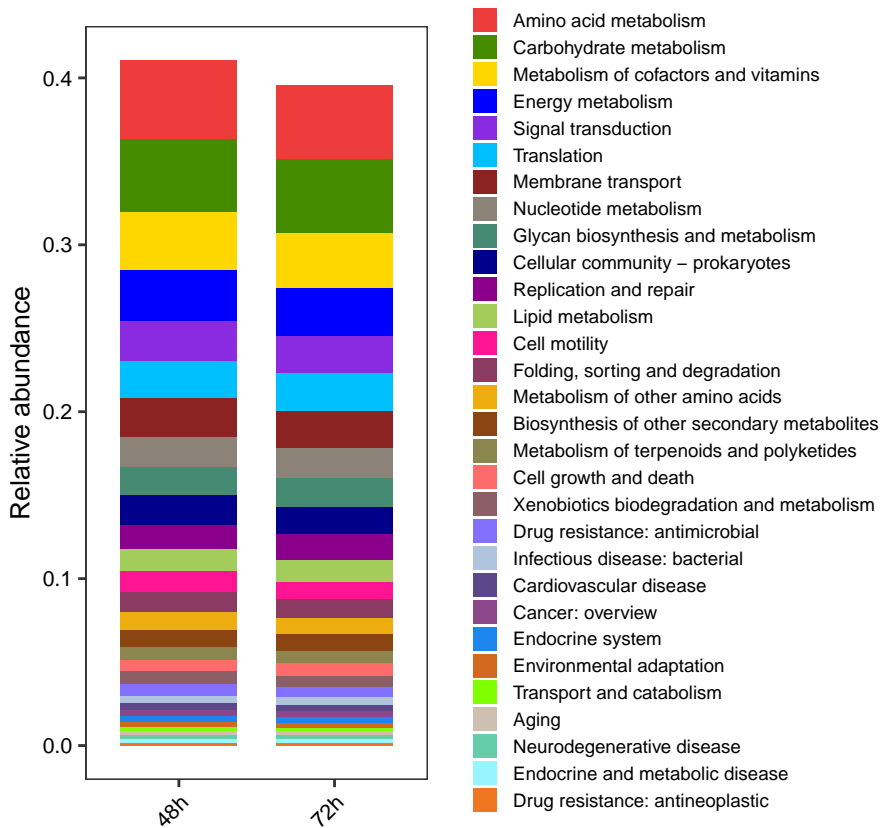

Supplement: Raw_data_3.zip [file KEGG.pathway.top30.pdf › Raw data 3 Structural of microbial communities/KEGG.pathway.top30.pdf]

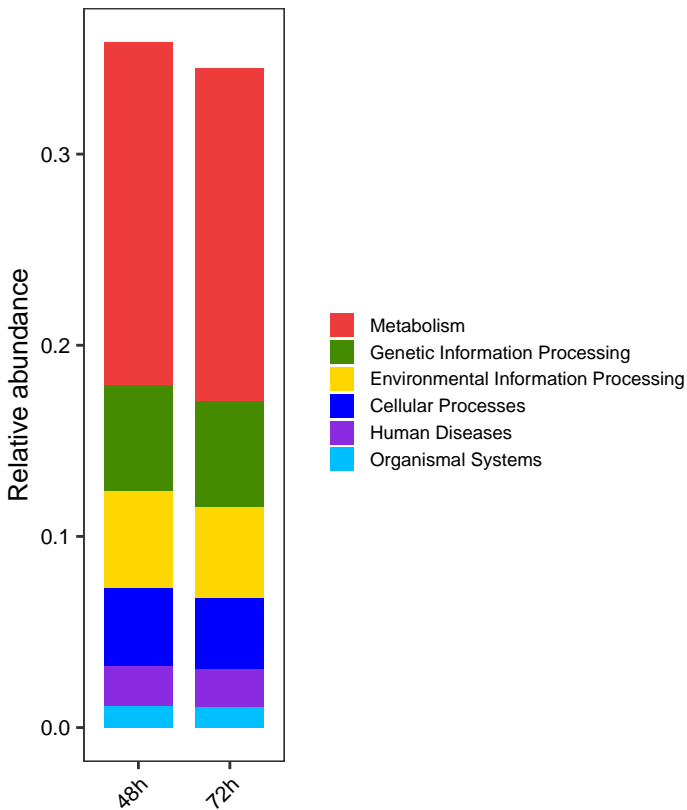

Supplement: Raw_data_3.zip [file KEGG.pathwayall.pdf › Raw data 3 Structural of microbial communities/KEGG.pathwayall.pdf]

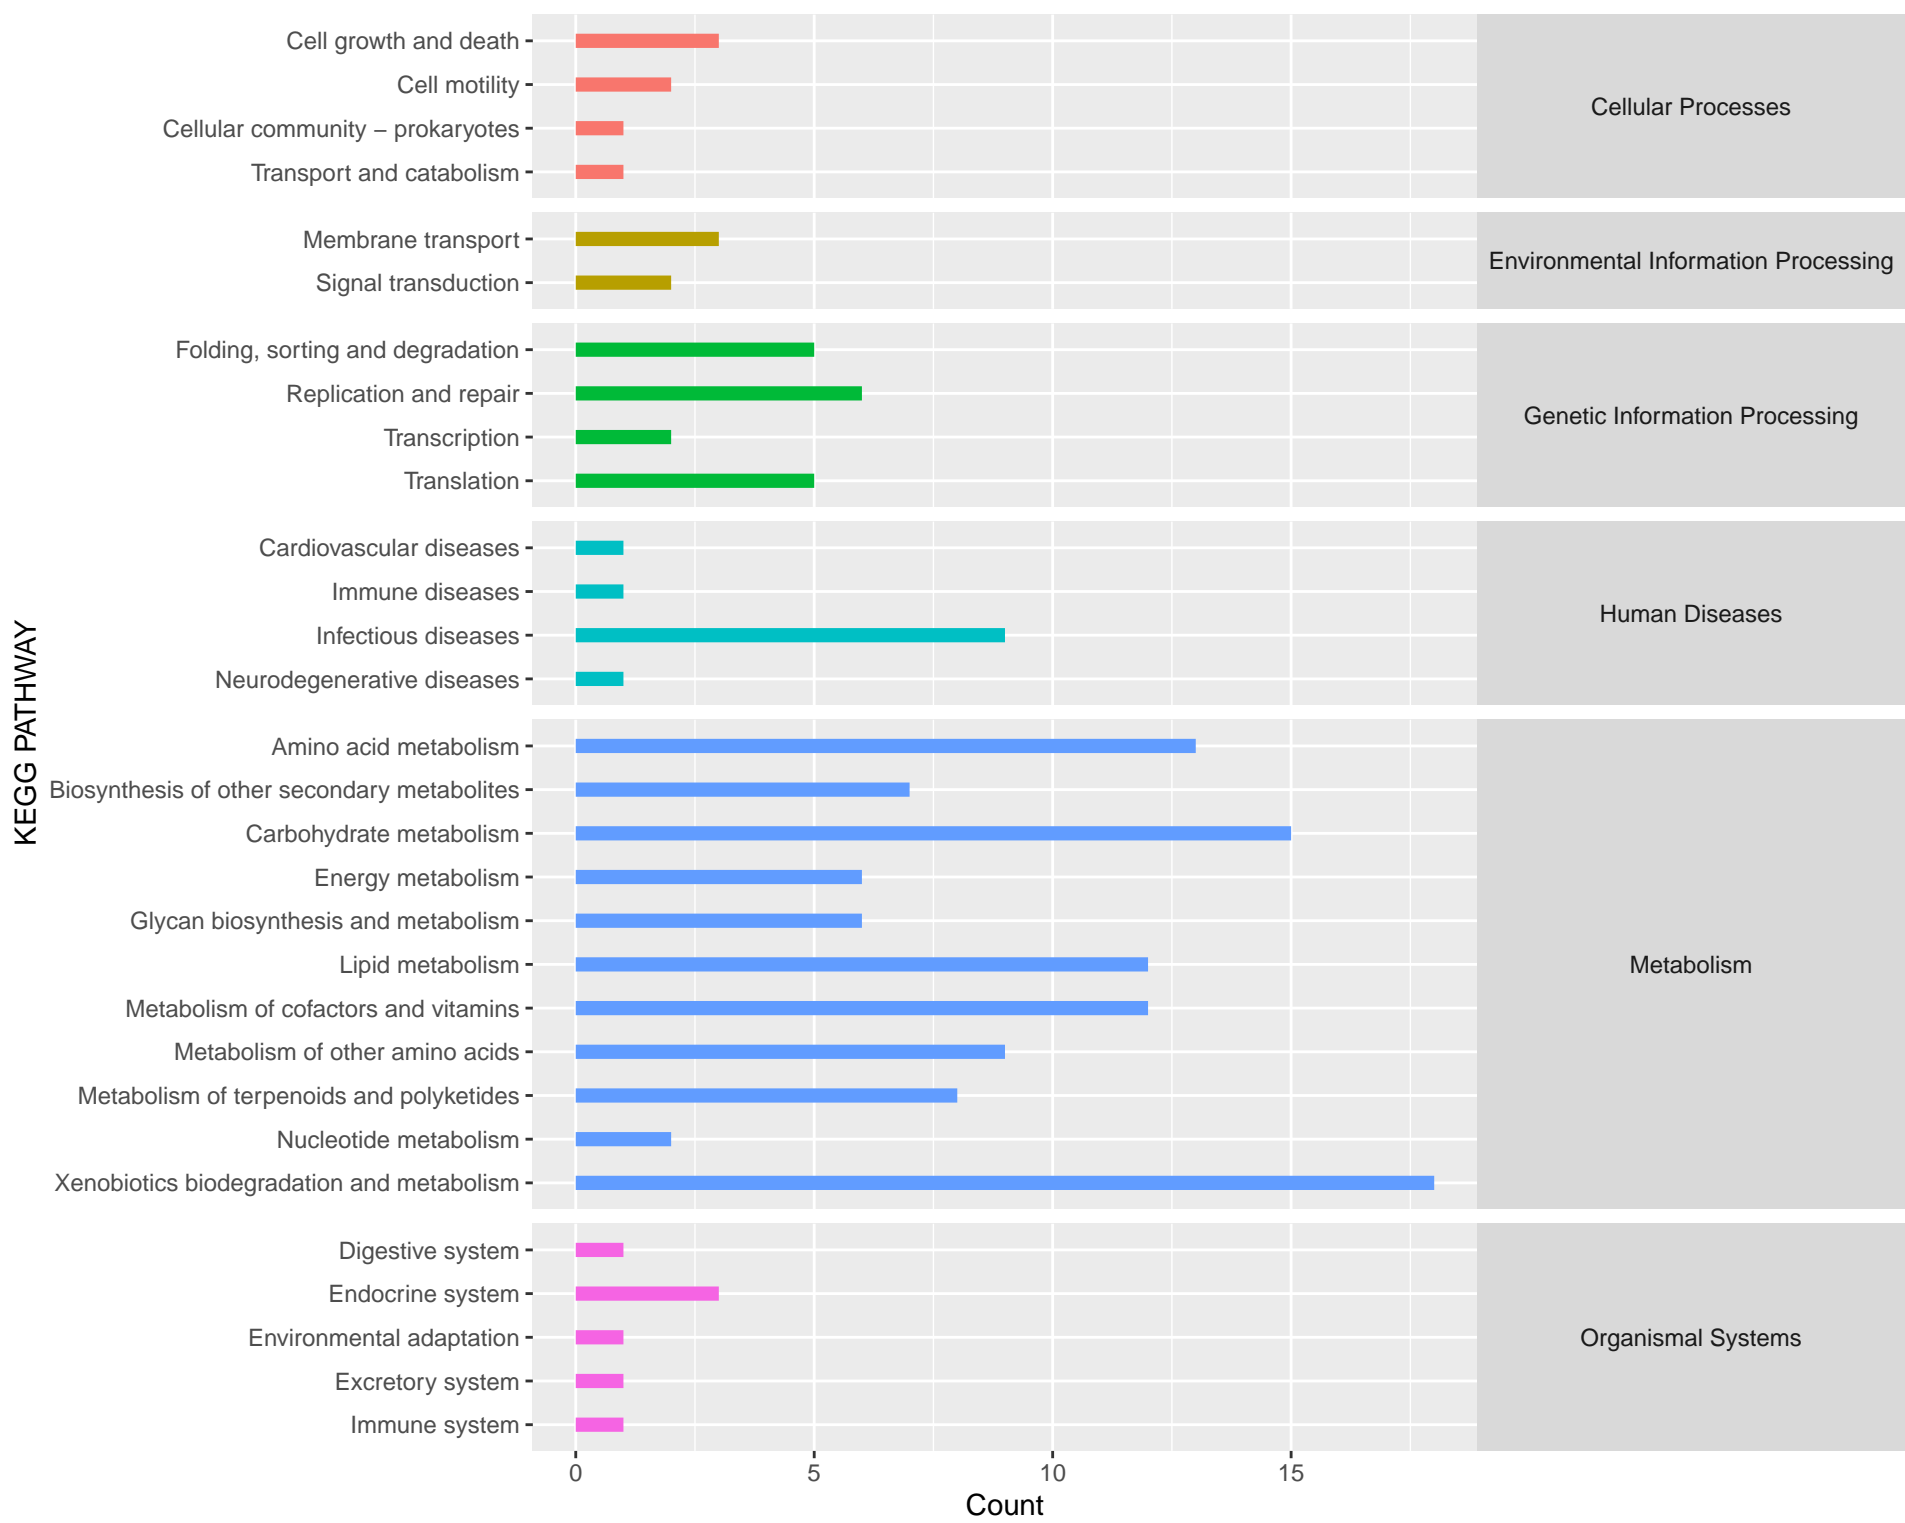

Supplement: Raw_data_3.zip [file KEGG_occur.pdf › Raw data 3 Structural of microbial communities/KEGG_occur.pdf]

# KEGG classification statistics

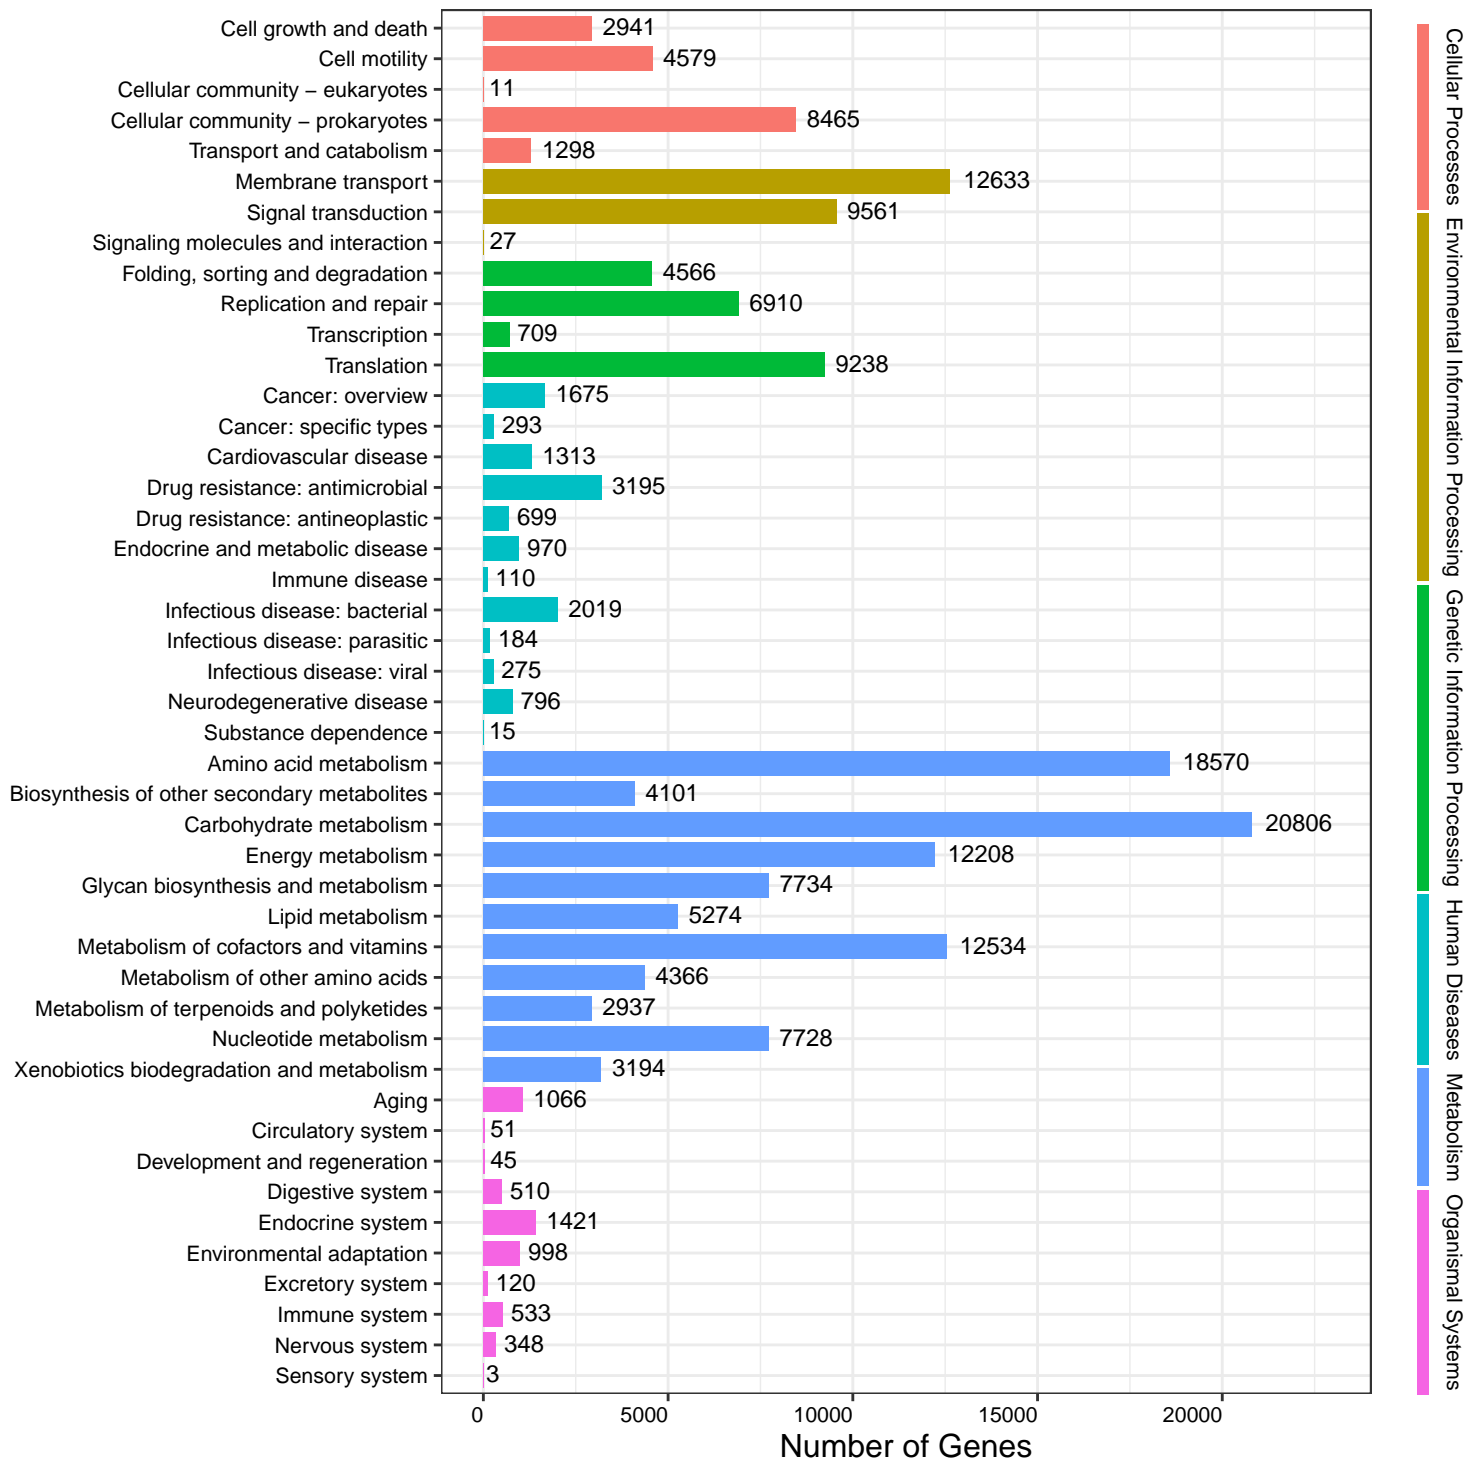

Supplement: Raw_data_3.zip [file KEGG_pathway_hierarchy2.pdf › Raw data 3 Structural of microbial communities/KEGG_pathway_hierarchy2.pdf]

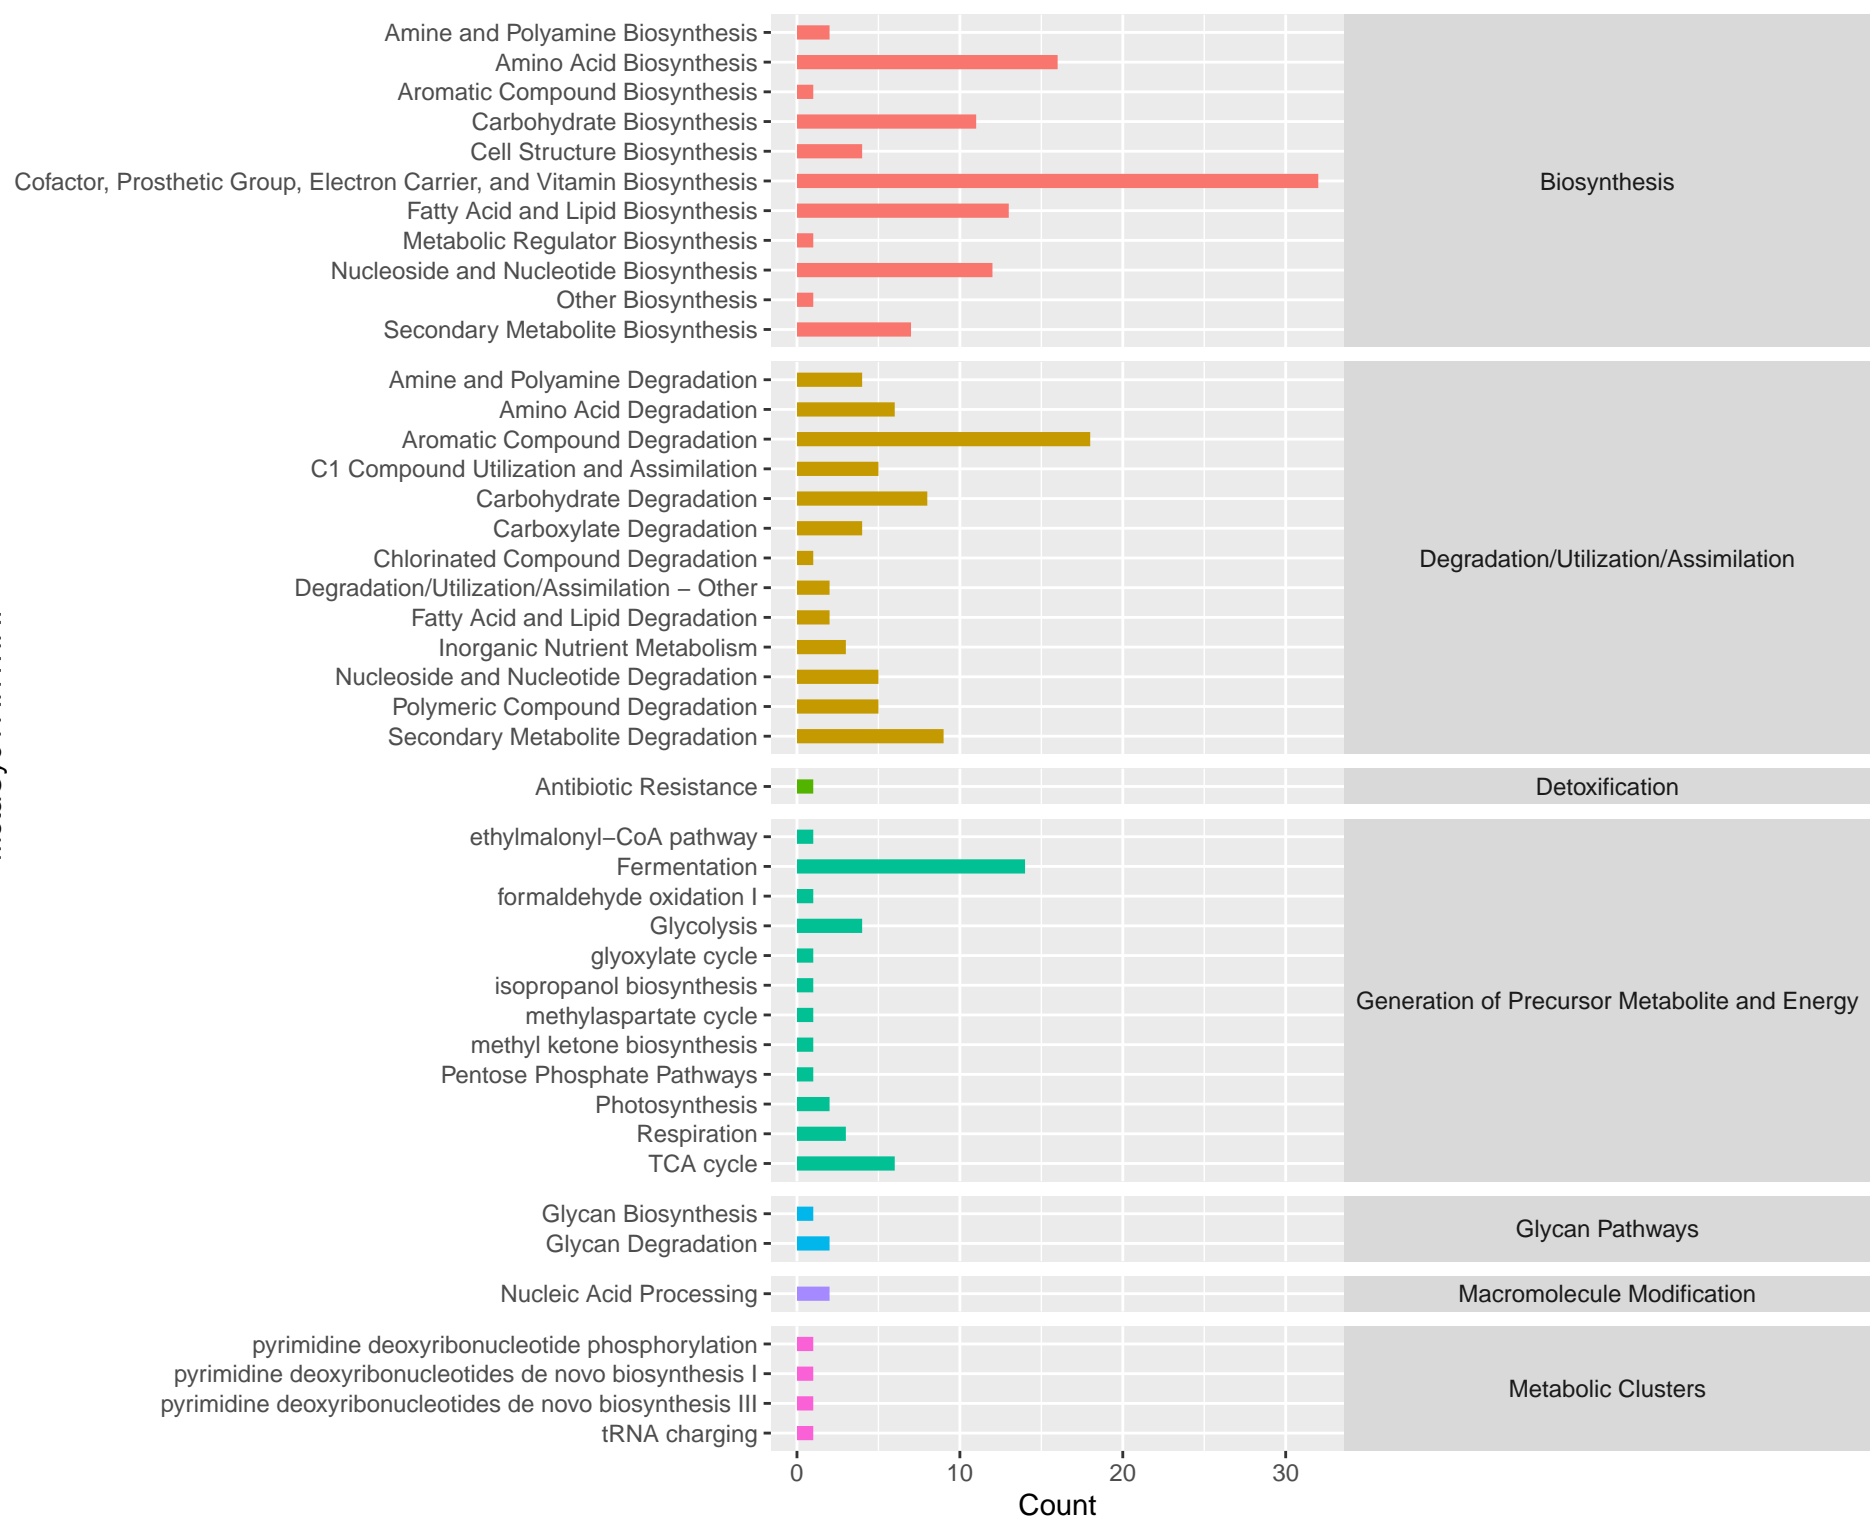

Supplement: Raw_data_3.zip [file MetaCyc_occur.pdf › Raw data 3 Structural of microbial communities/MetaCyc_occur.pdf]

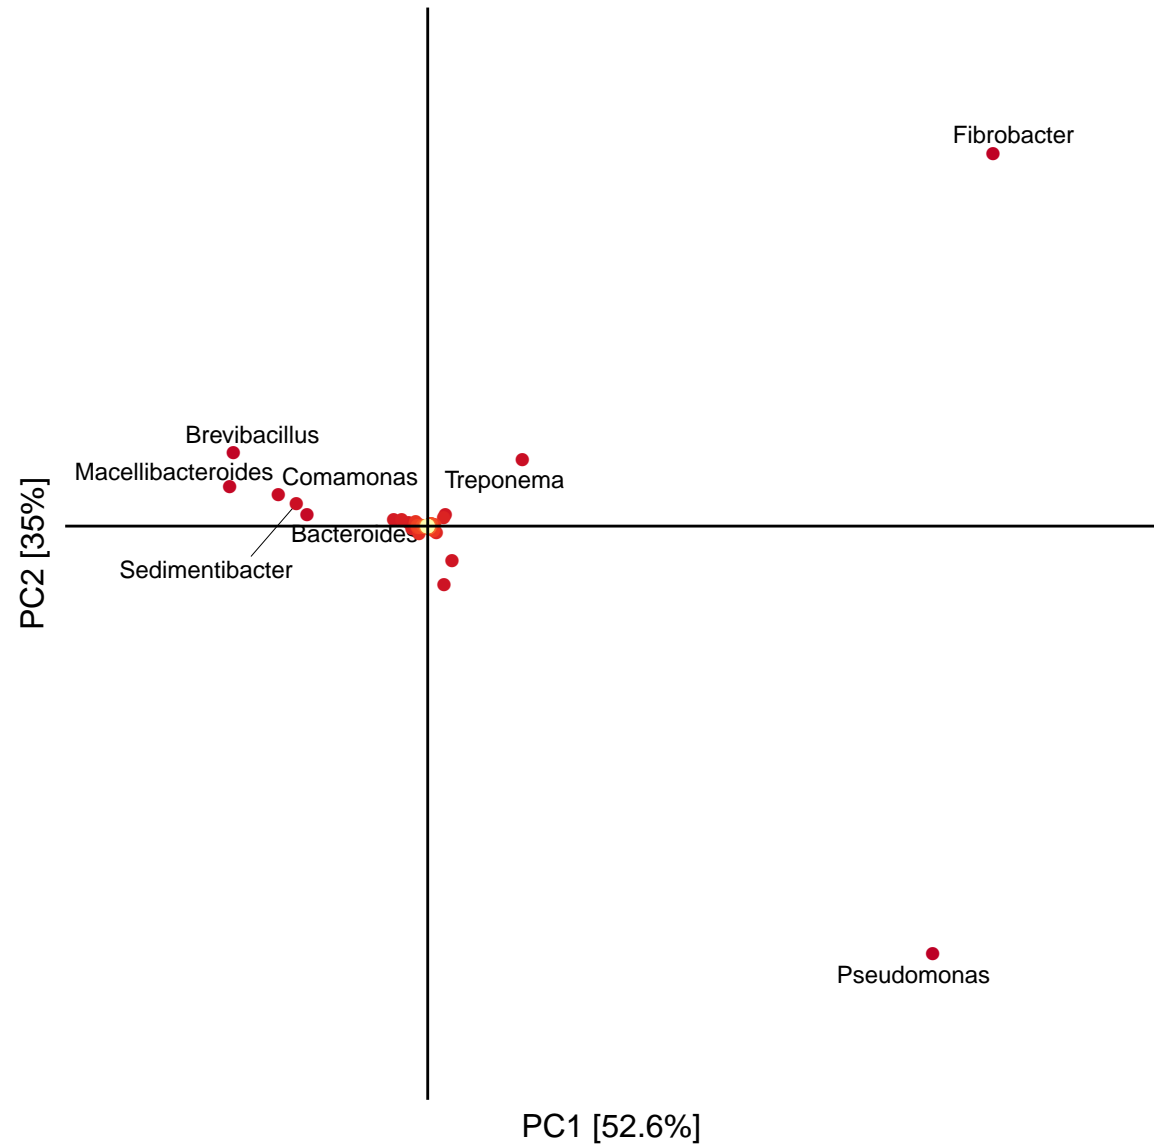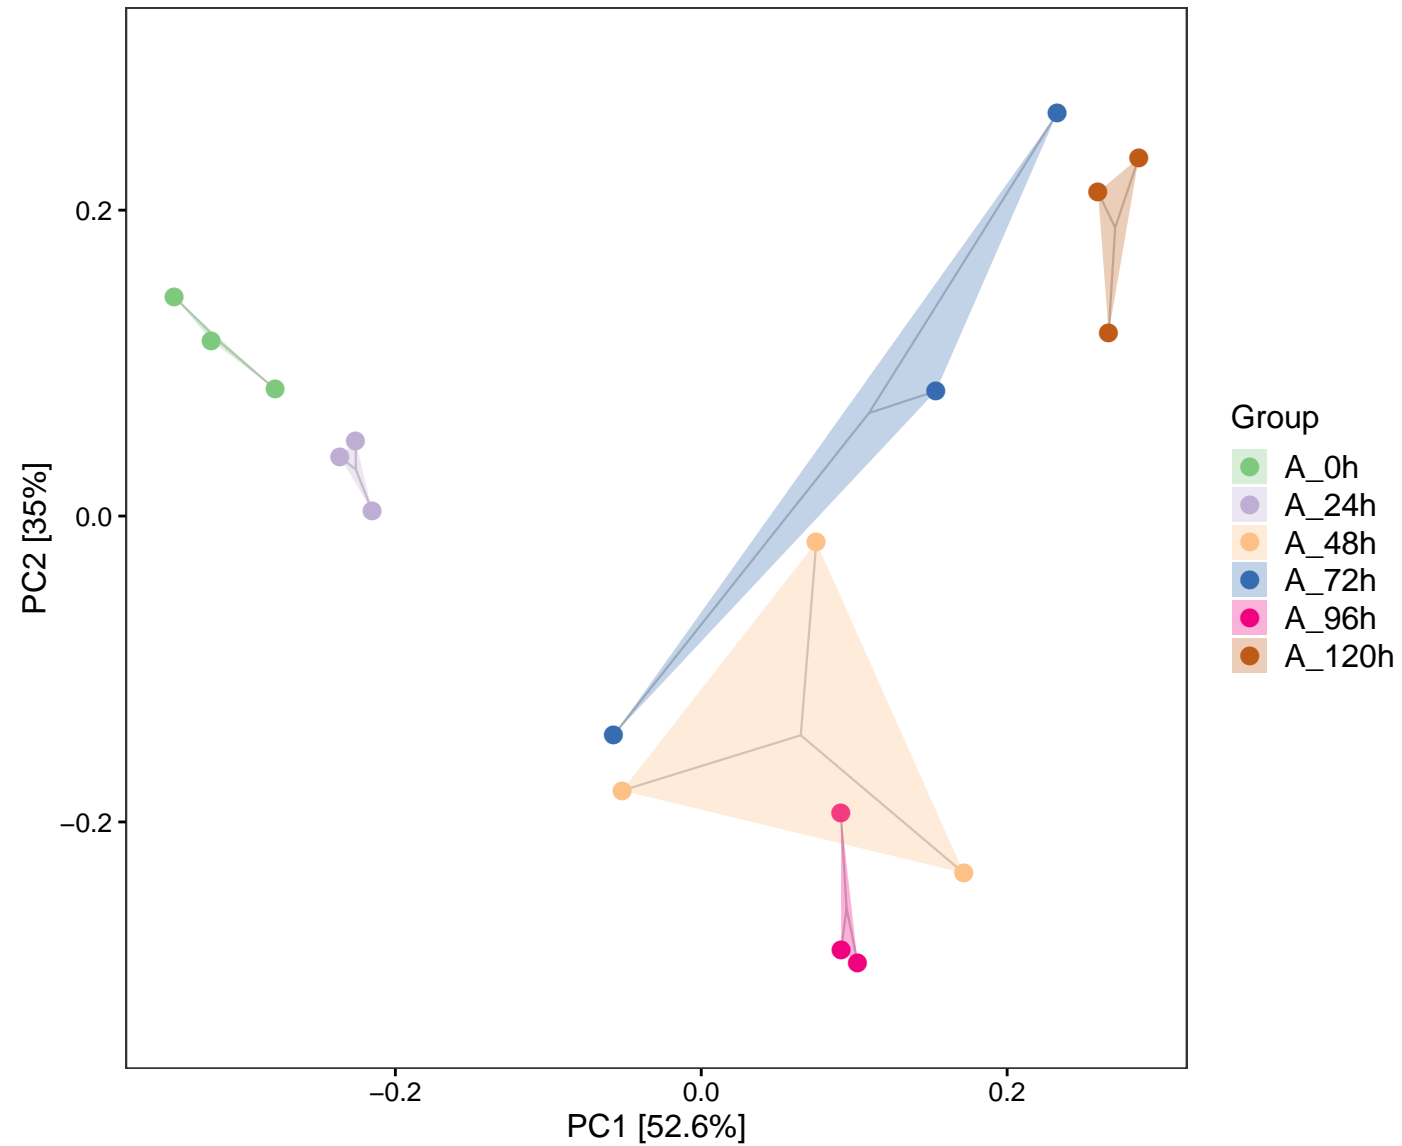

Supplement: Raw_data_3.zip [file PCA.hull.pdf › Raw data 3 Structural of microbial communities/PCA.hull.pdf]

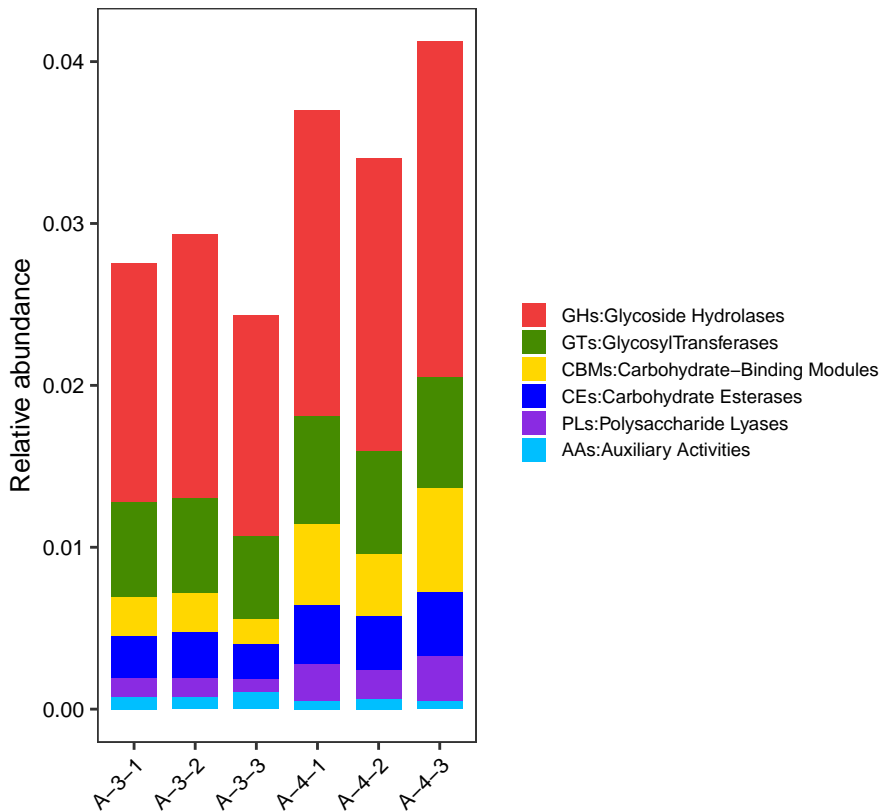

Supplement: Raw_data_3.zip [file Sample.CAZy.class.percentage.all.histogram.pdf › Raw data 3 Structural of microbial communities/Sample.CAZy.class.percentage.all.histogram.pdf]

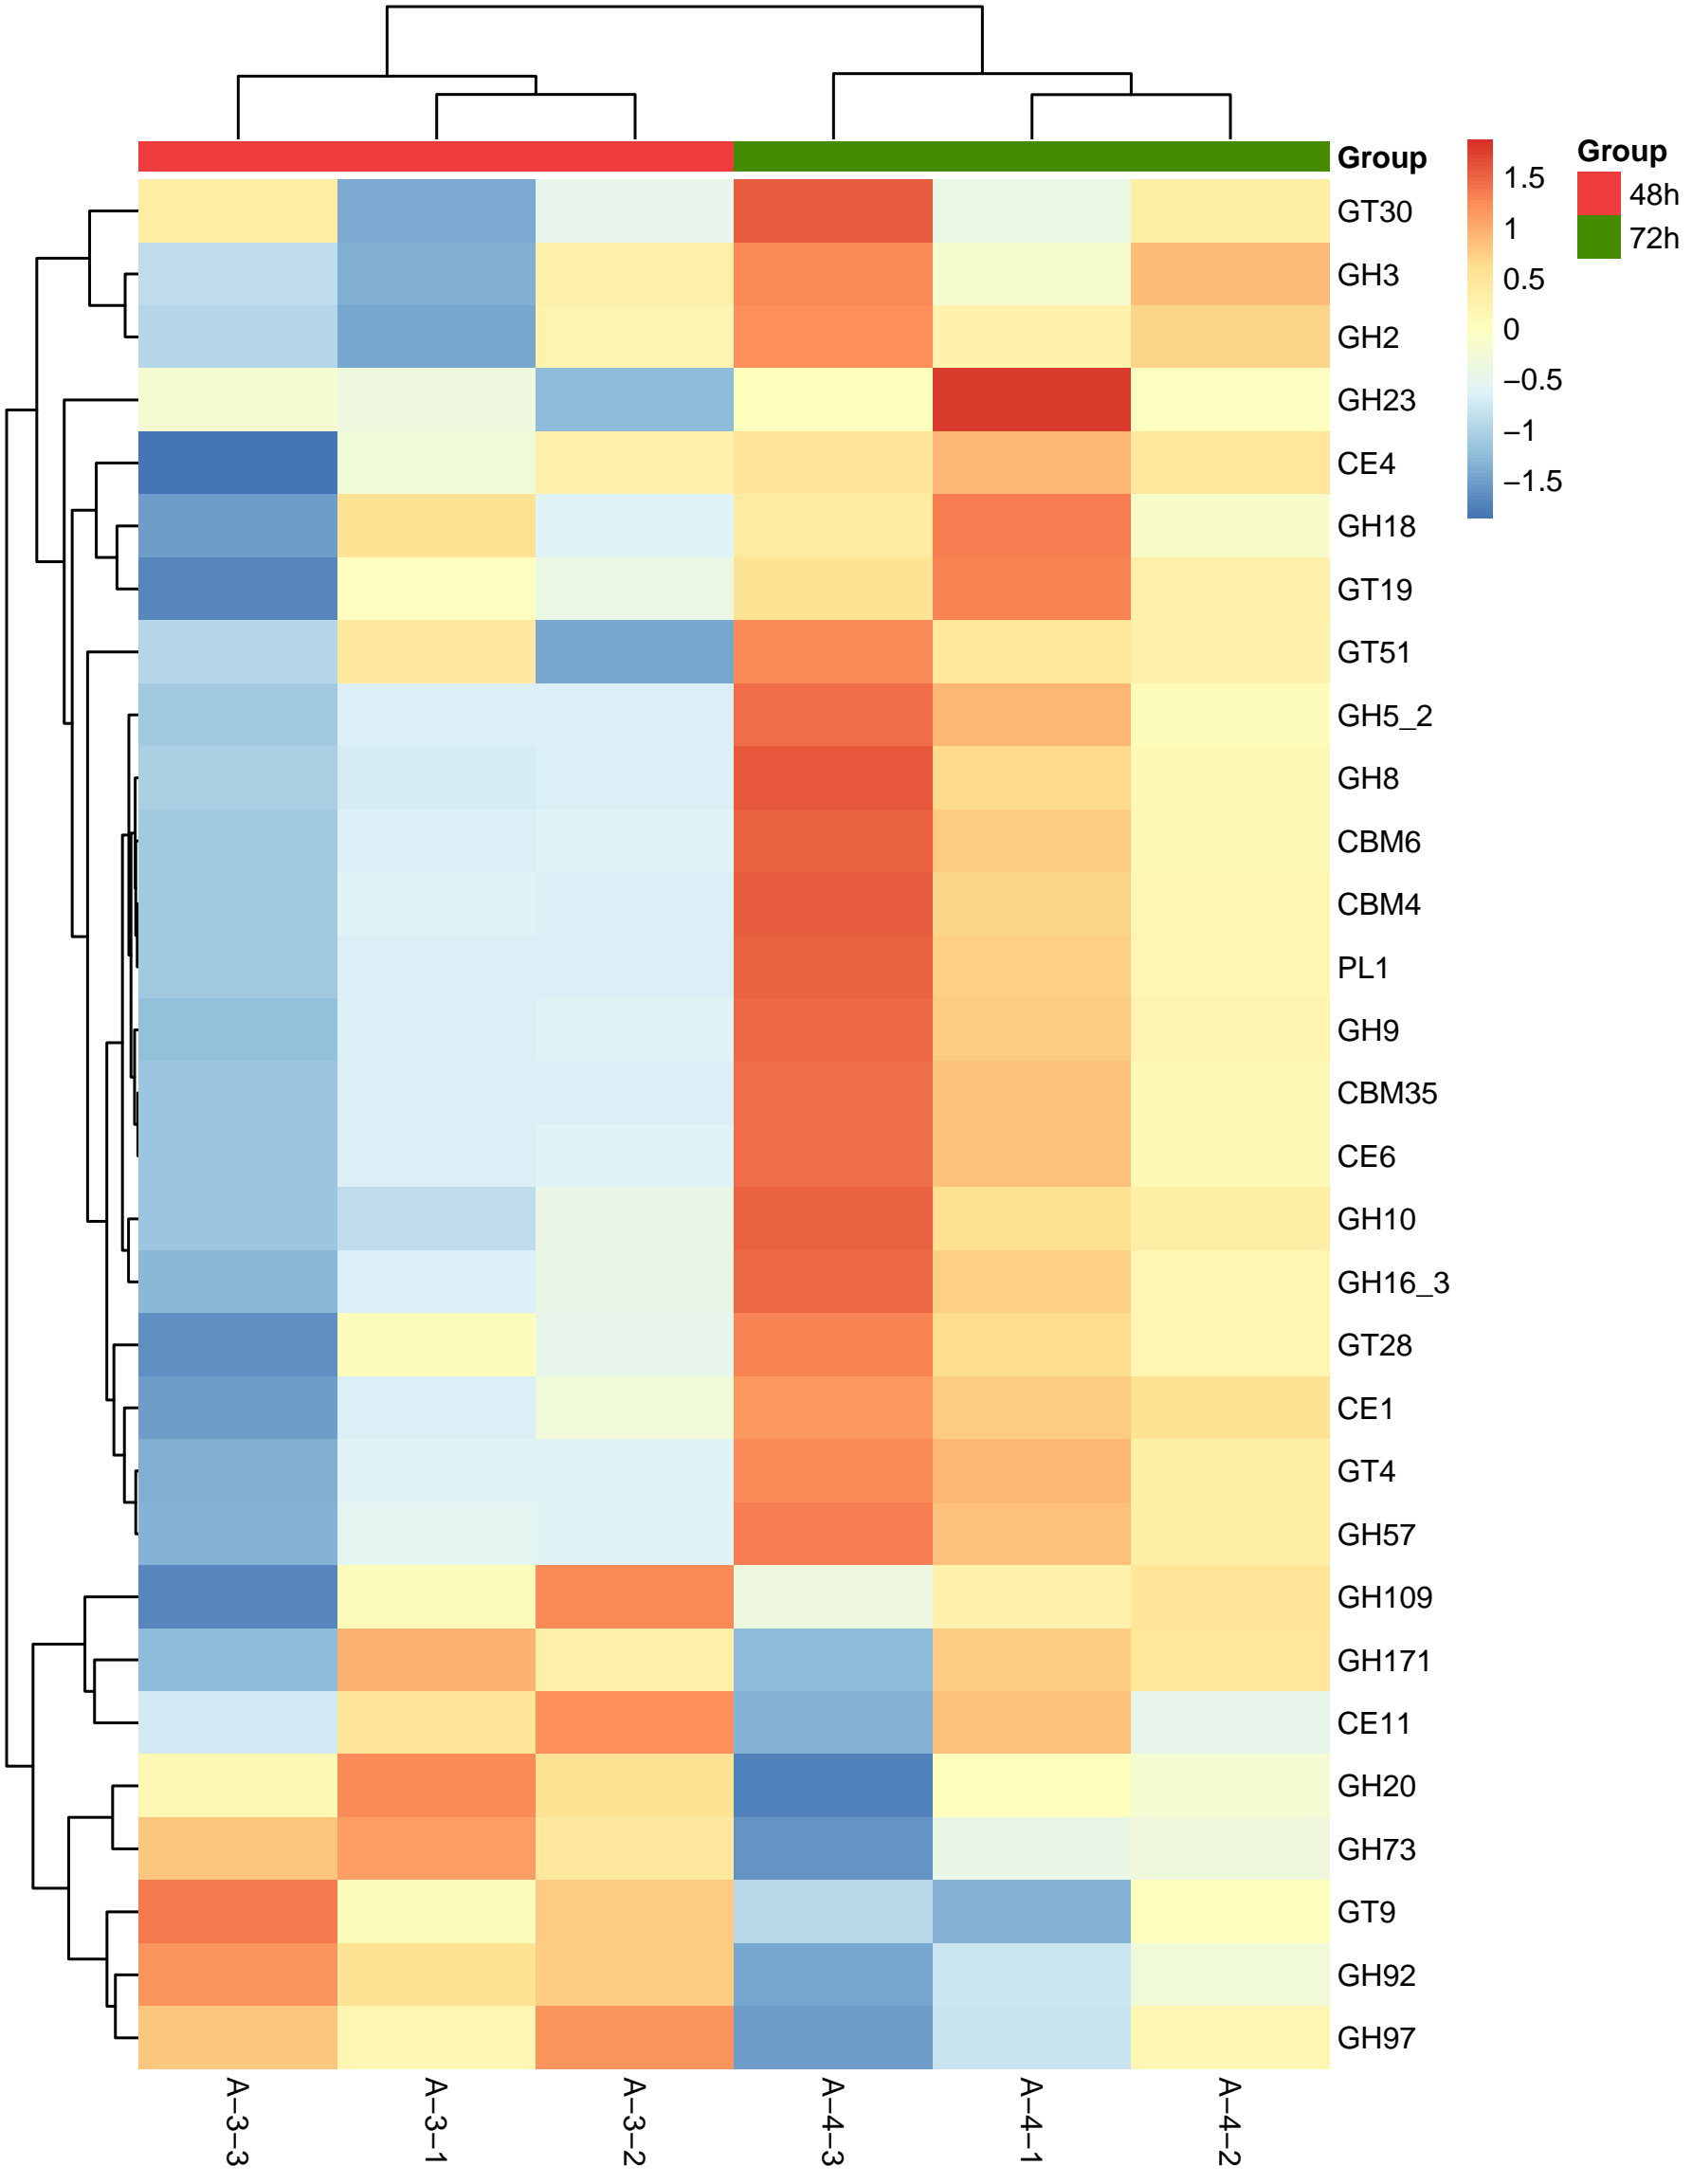

Supplement: Raw_data_3.zip [file Sample.CAZy.family.TPM.top30.heatmap.pdf › Raw data 3 Structural of microbial communities/Sample.CAZy.family.TPM.top30.heatmap.pdf]

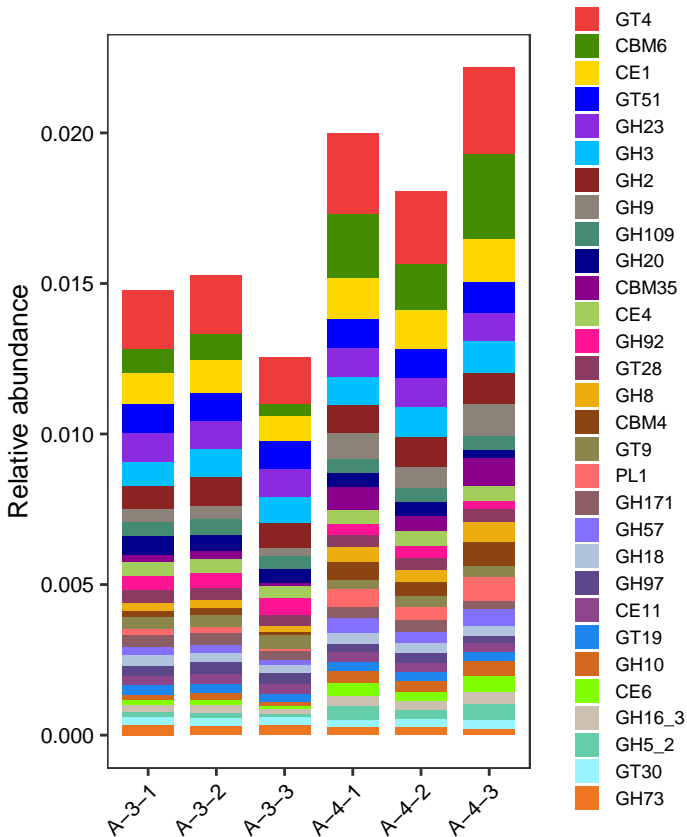

Supplement: Raw_data_3.zip [file Sample.CAZy.family.percentage.top30.histogram.pdf › Raw data 3 Structural of microbial communities/Sample.CAZy.family.percentage.top30.histogram.pdf]

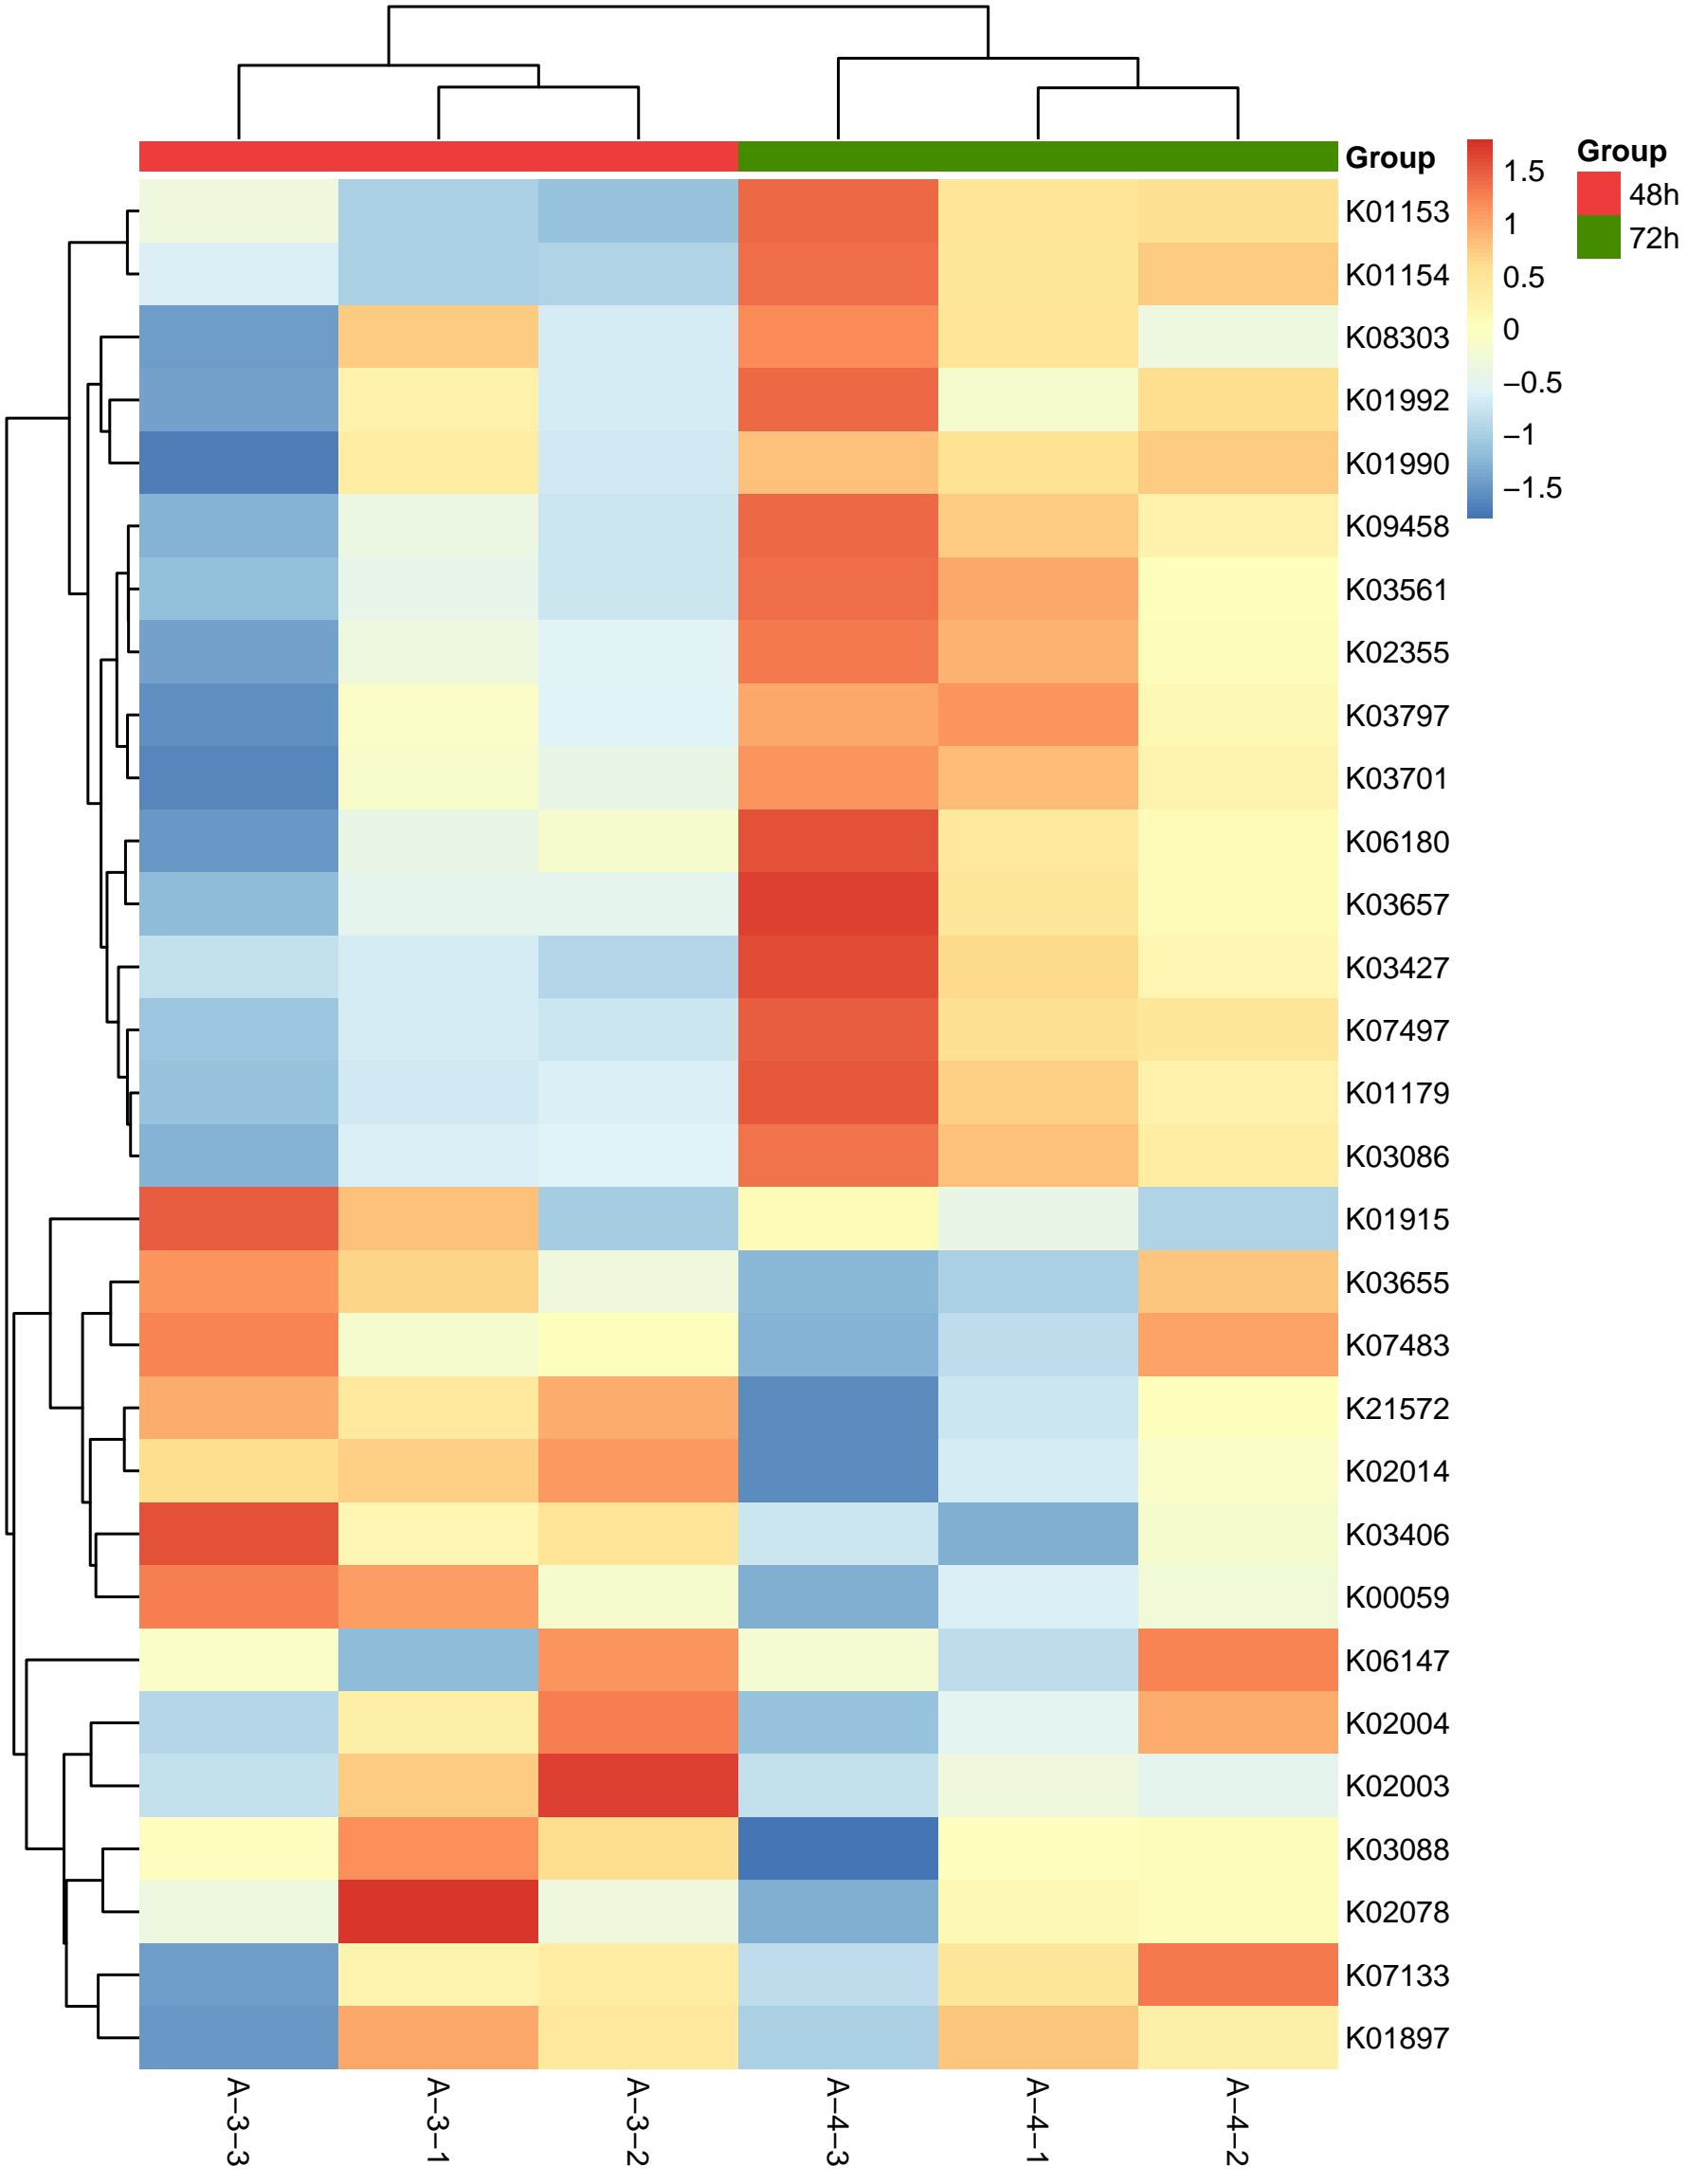

Supplement: Raw_data_3.zip [file Sample.KEGG.KO.TPM.top30.heatmap.pdf › Raw data 3 Structural of microbial communities/Sample.KEGG.KO.TPM.top30.heatmap.pdf]

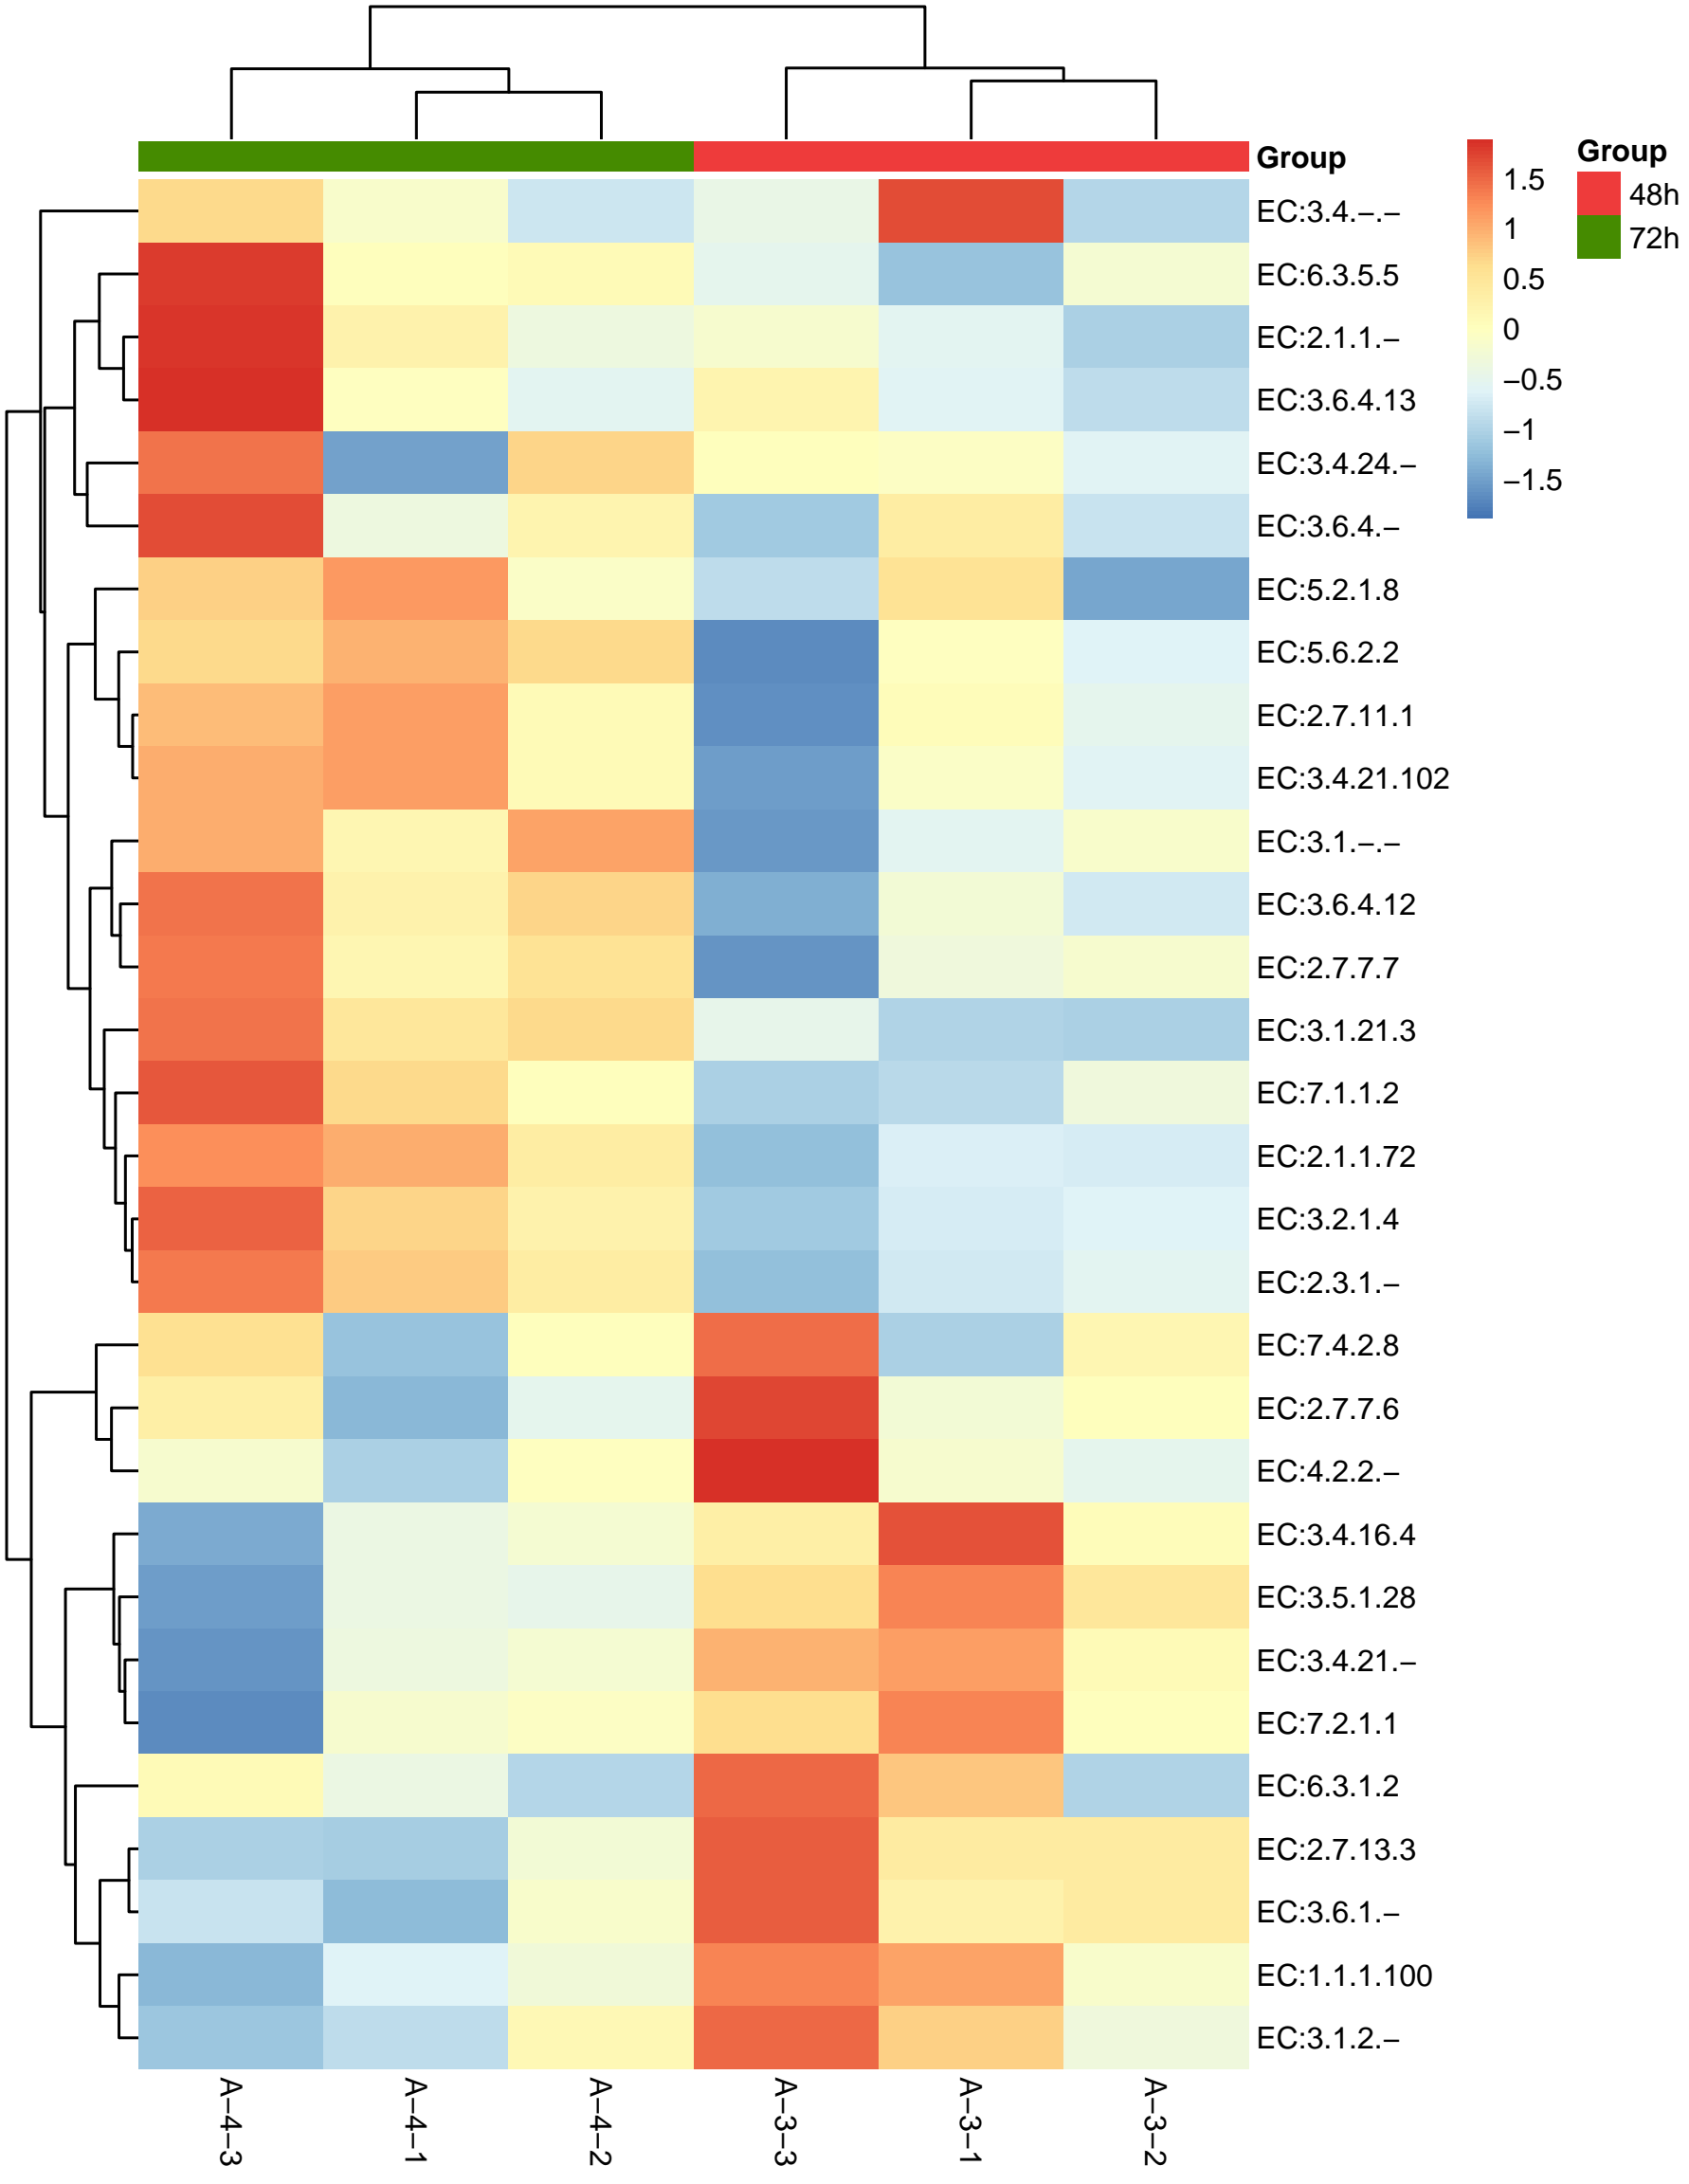

Supplement: Raw_data_3.zip [file Sample.KEGG.enzyme.TPM.top30.heatmap.pdf › Raw data 3 Structural of microbial communities/Sample.KEGG.enzyme.TPM.top30.heatmap.pdf]

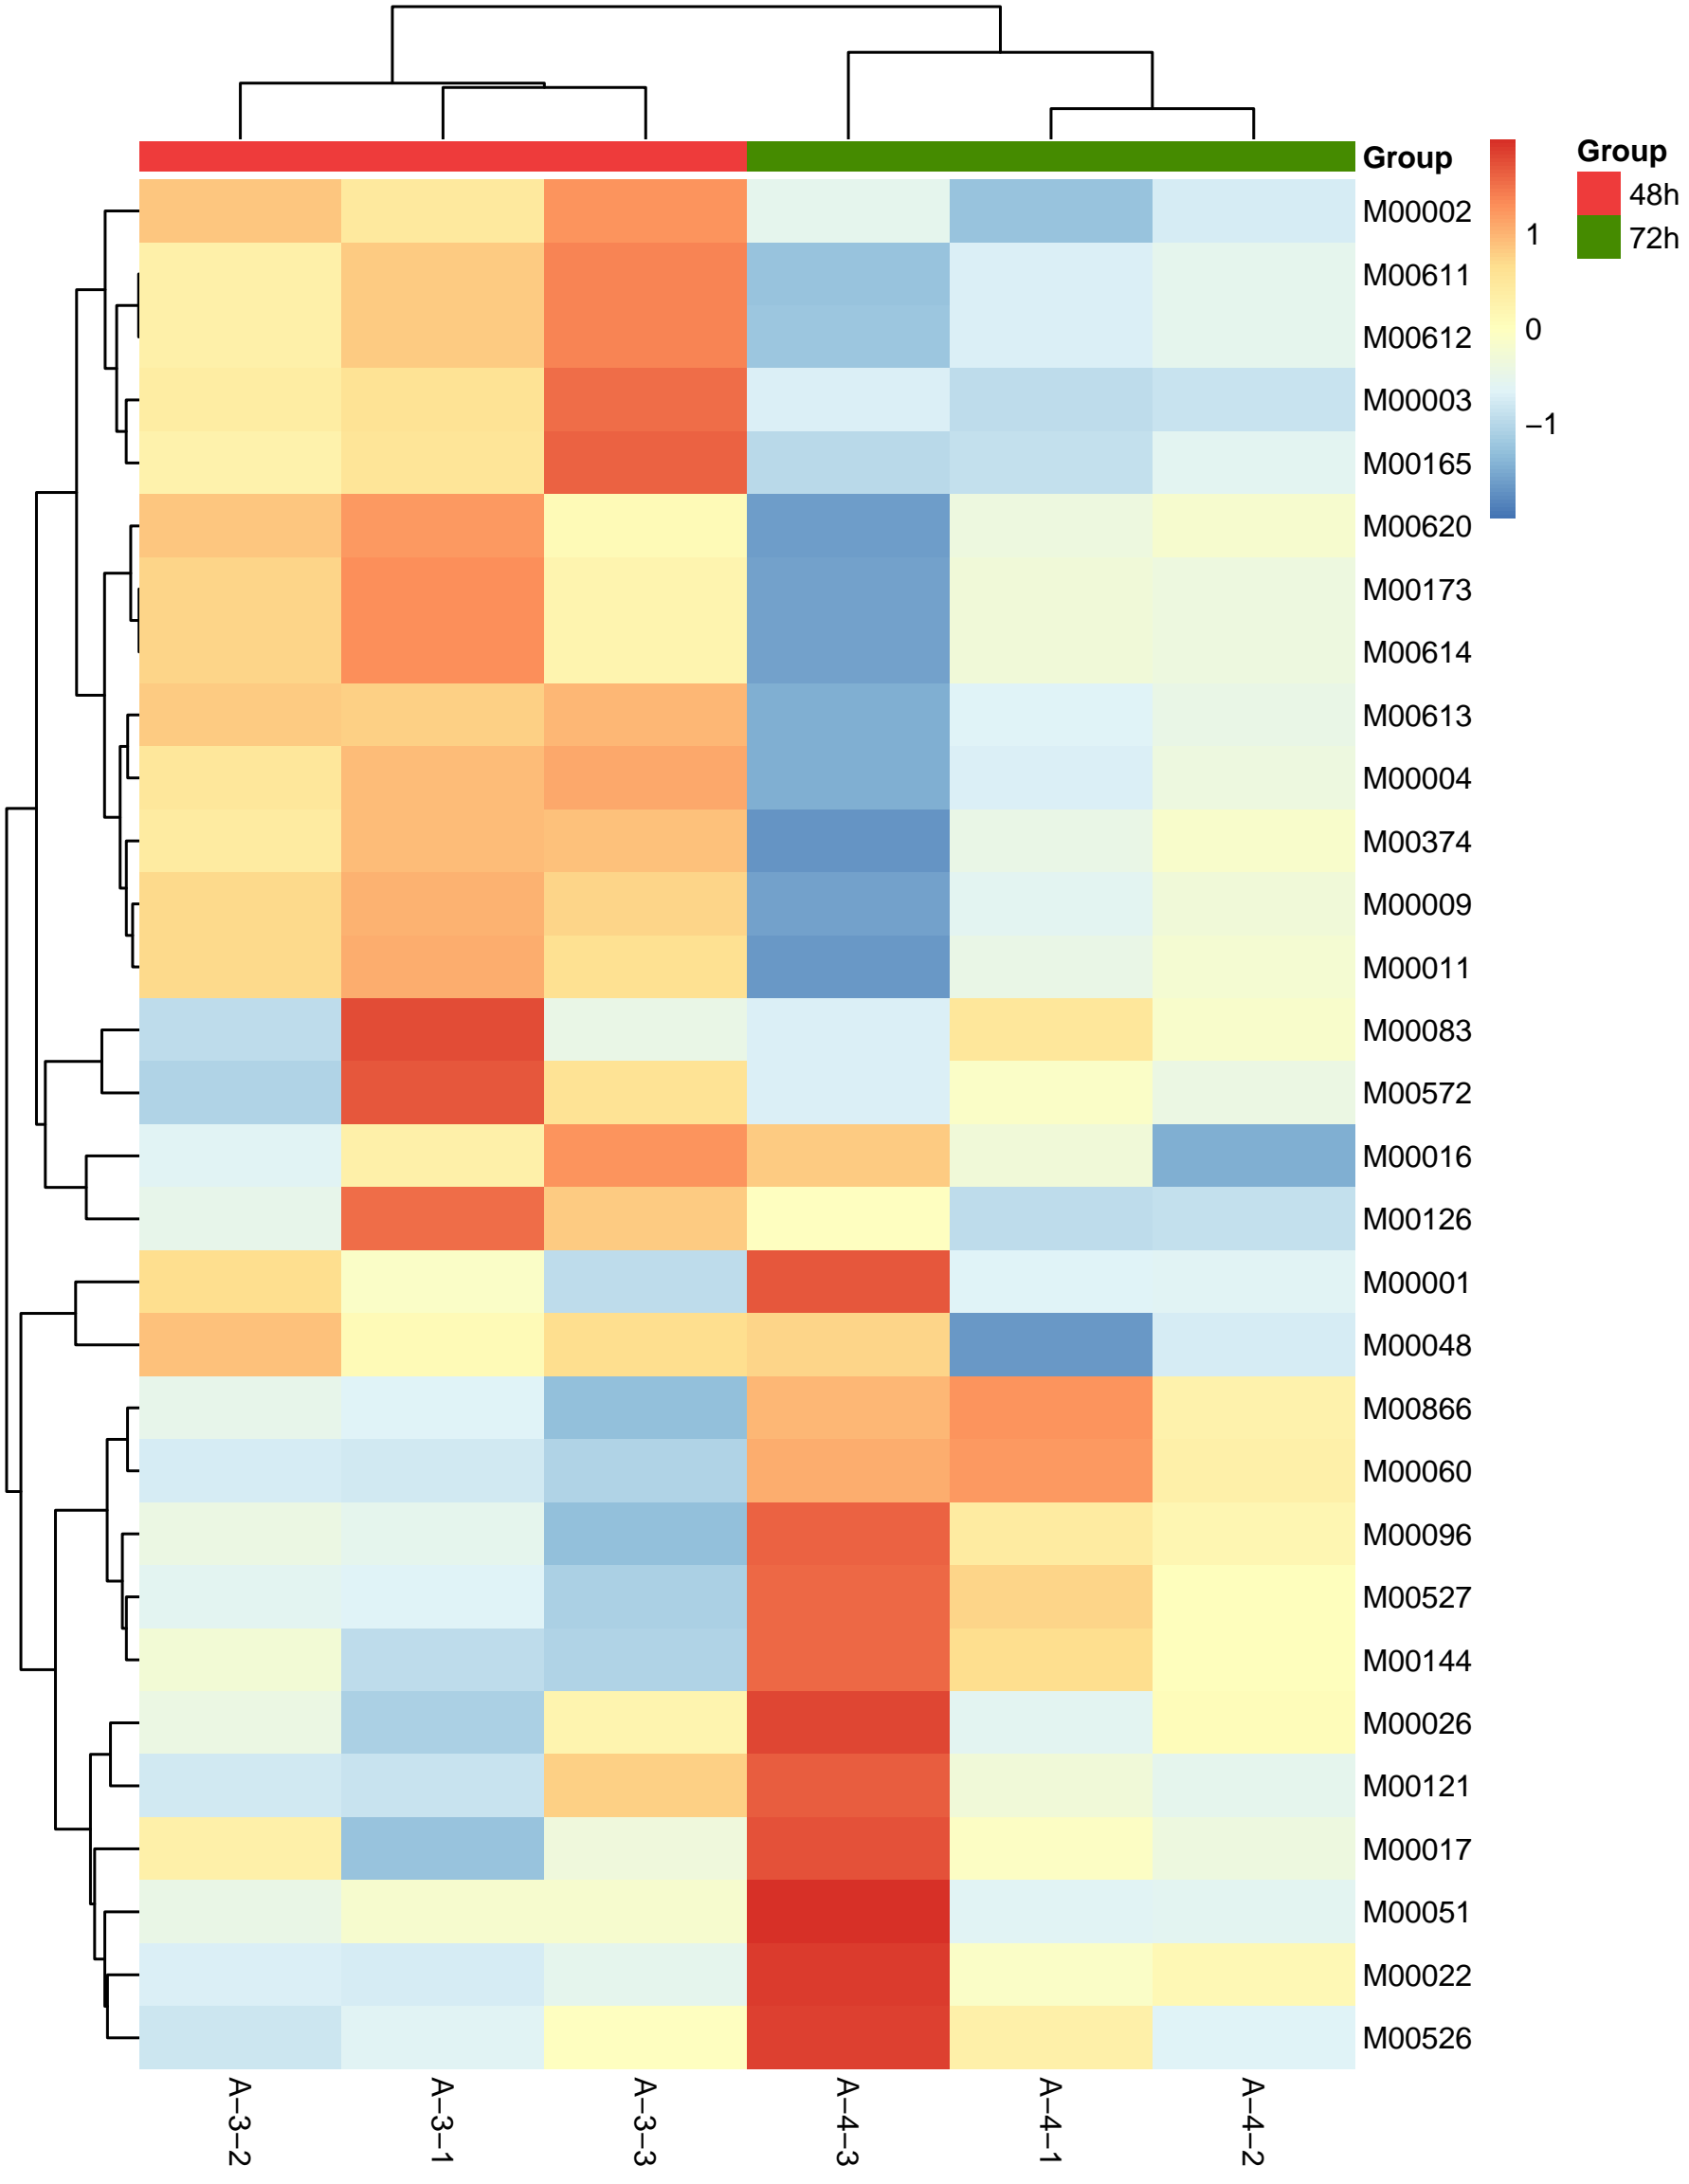

Supplement: Raw_data_3.zip [file Sample.KEGG.module.TPM.top30.heatmap.pdf › Raw data 3 Structural of microbial communities/Sample.KEGG.module.TPM.top30.heatmap.pdf]

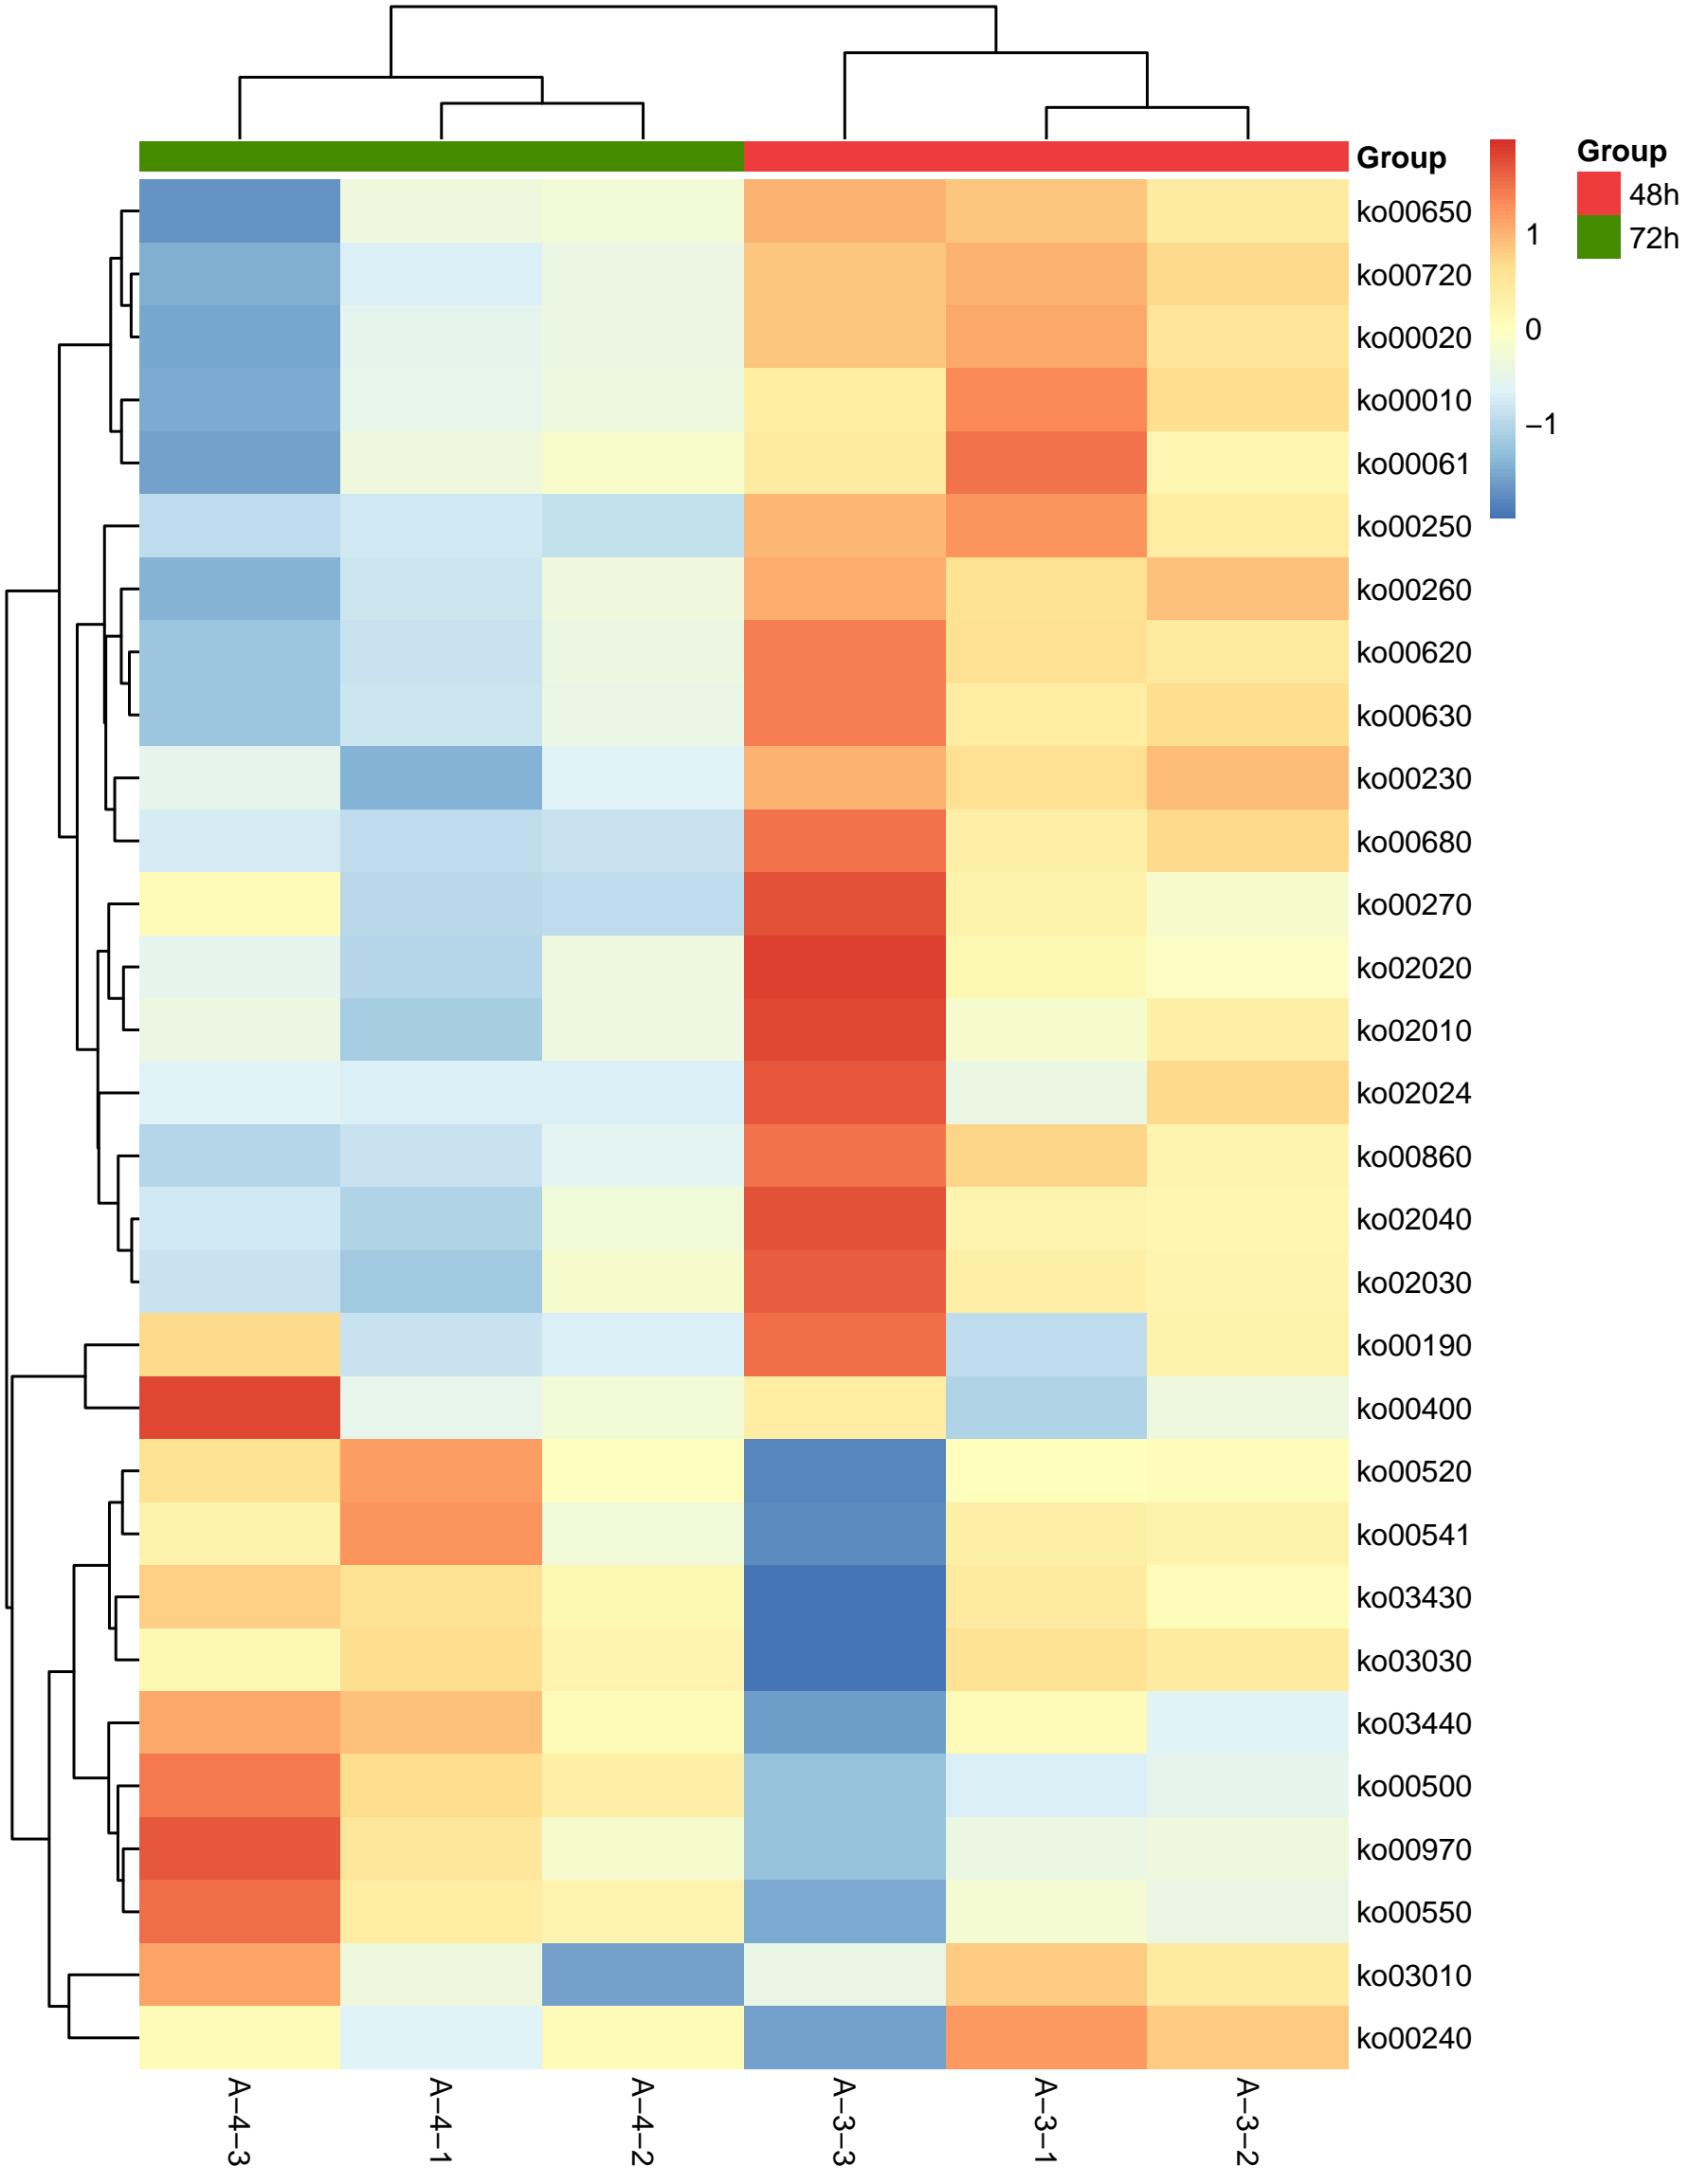

Supplement: Raw_data_3.zip [file Sample.KEGG.pathway.TPM.top30.heatmap.pdf › Raw data 3 Structural of microbial communities/Sample.KEGG.pathway.TPM.top30.heatmap.pdf]

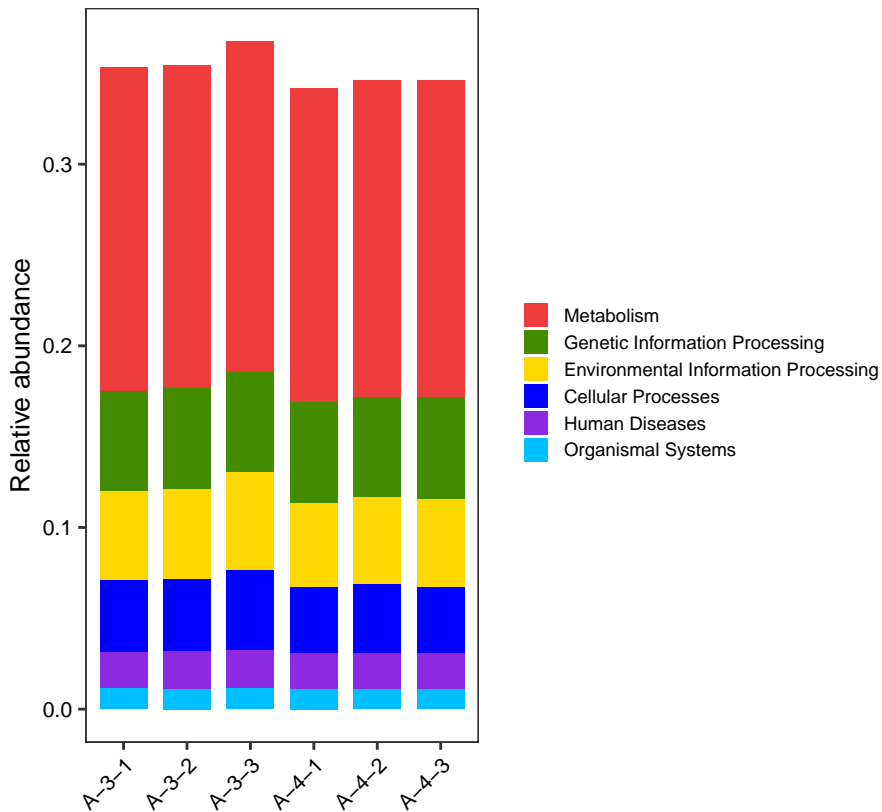

Supplement: Raw_data_3.zip [file Sample.KEGG.pathway_hierarchy1.percentage.all.histogram.pdf › Raw data 3 Structural of microbial communities/Sample.KEGG.pathway_hierarchy1.percentage.all.histogram.pdf]

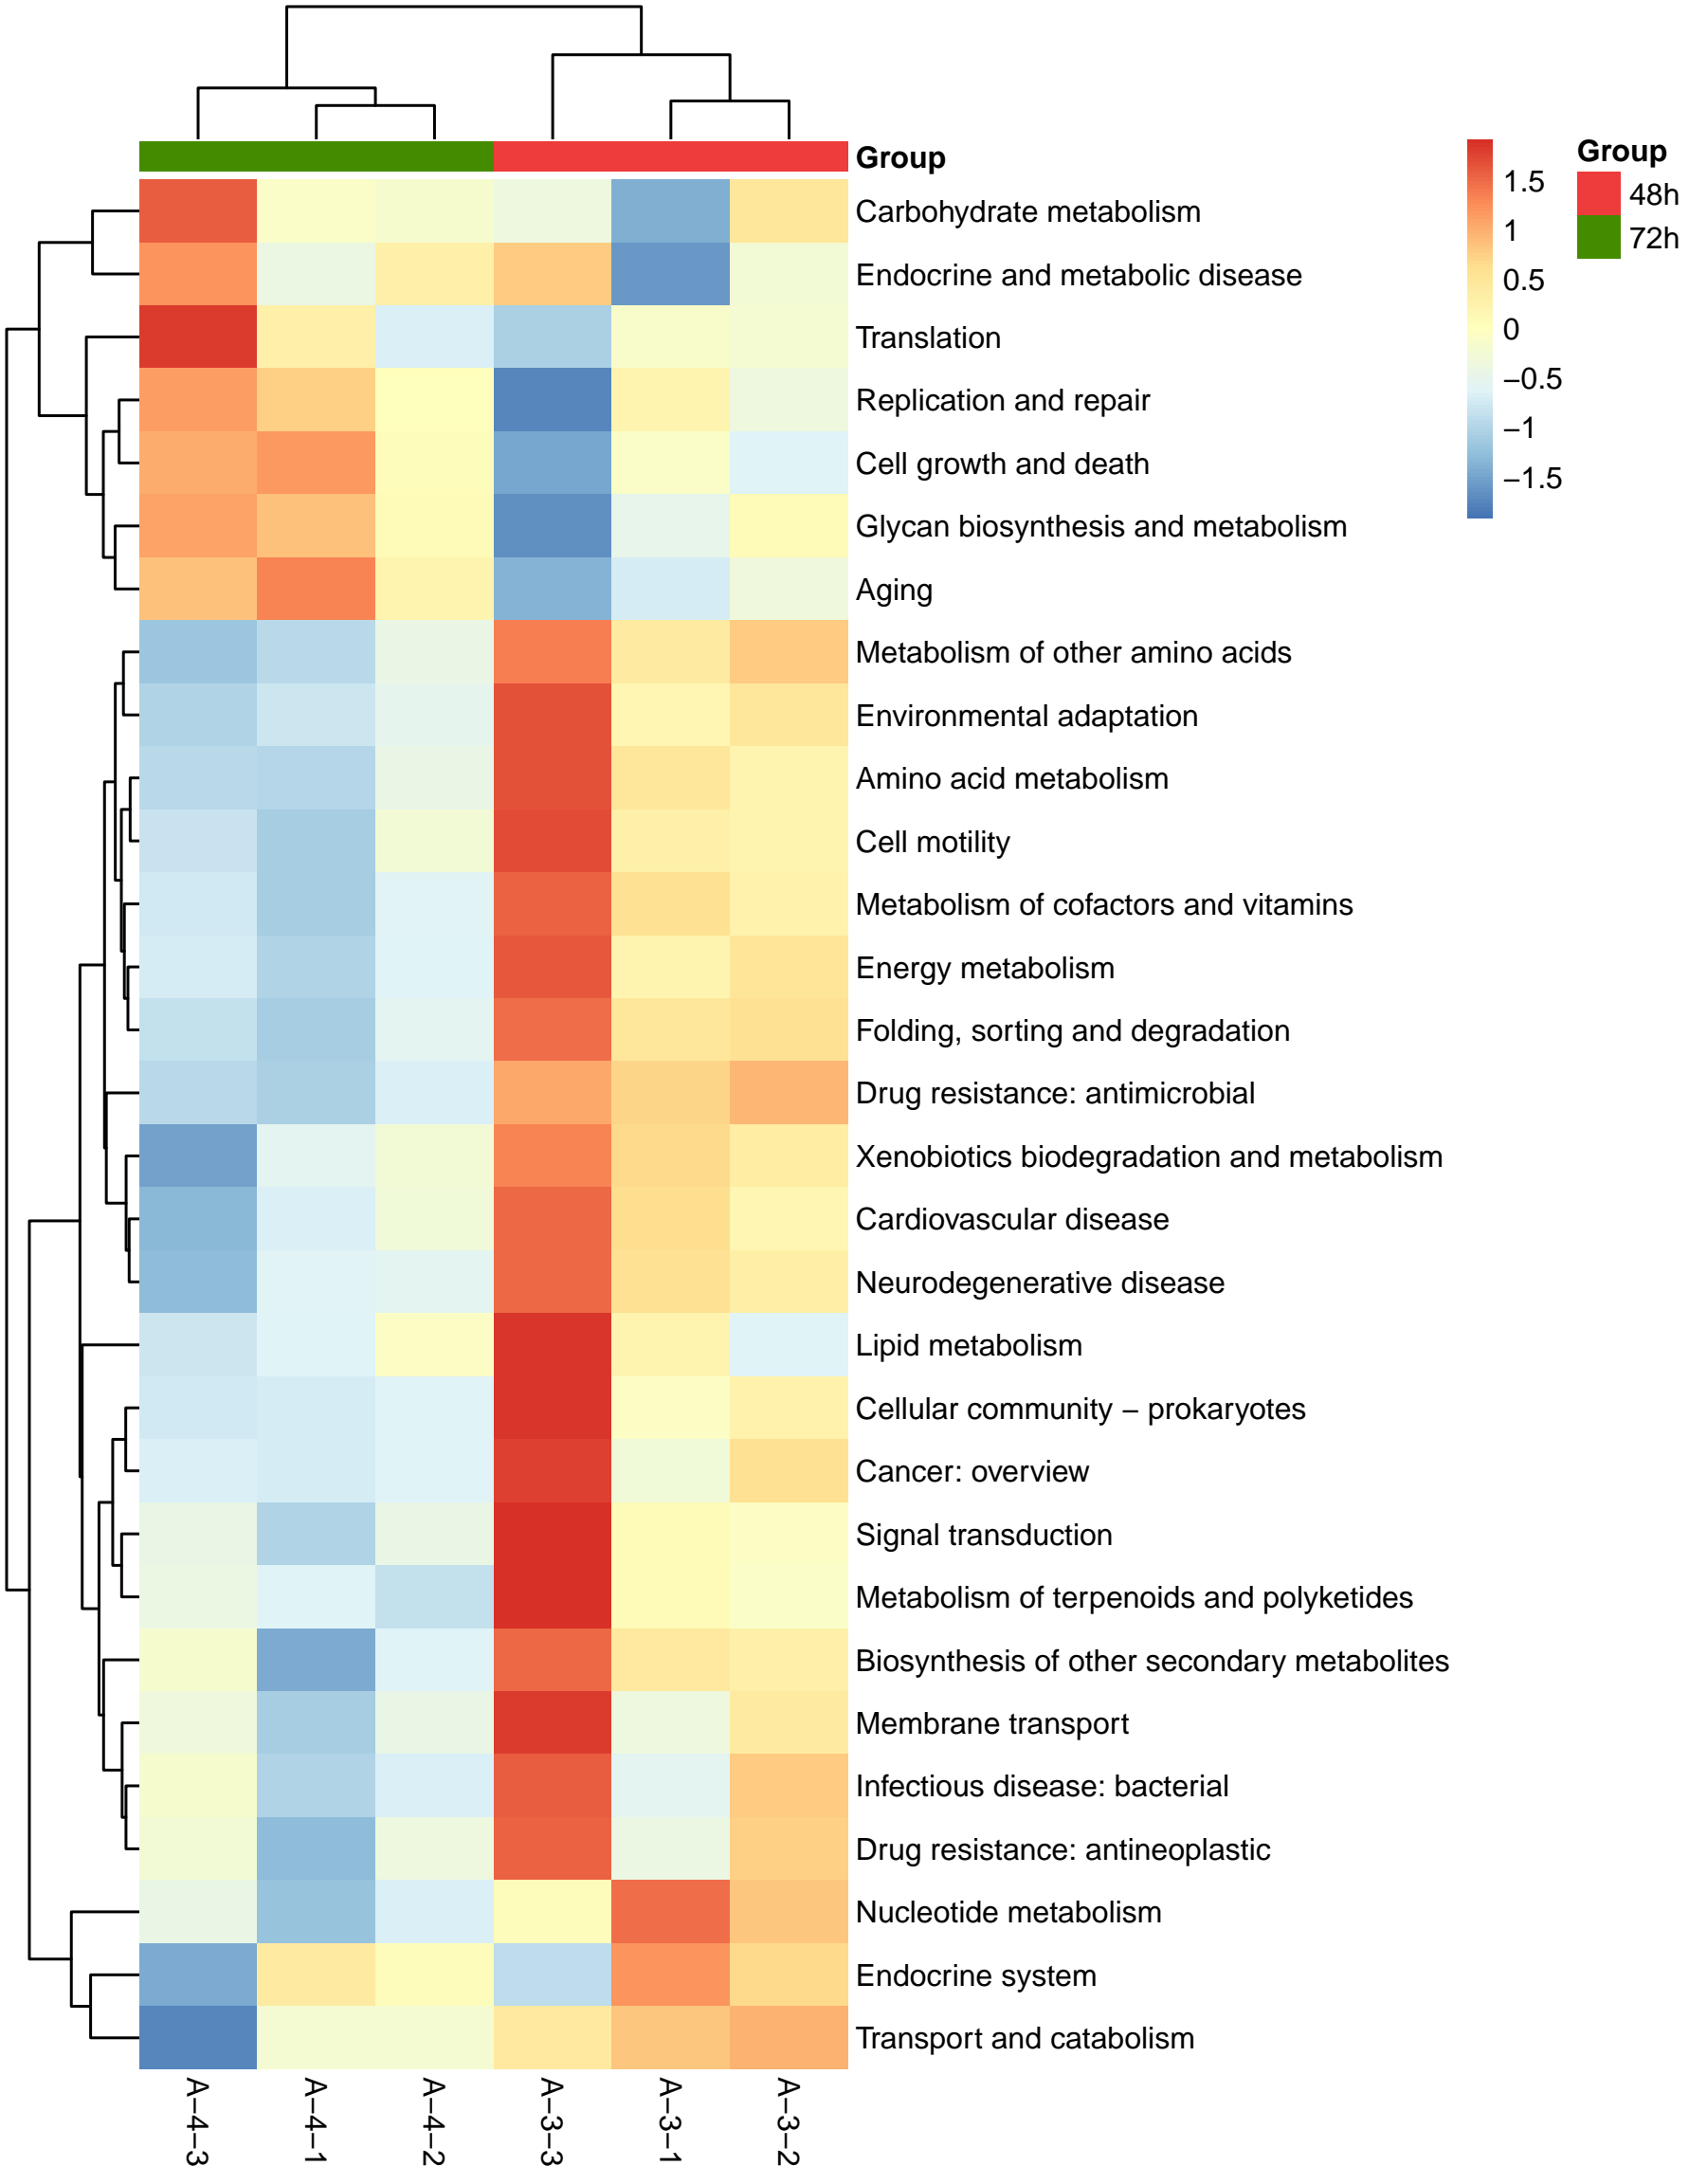

Supplement: Raw_data_3.zip [file Sample.KEGG.pathway_hierarchy2.TPM.top30.heatmap.pdf › Raw data 3 Structural of microbial communities/Sample.KEGG.pathway_hierarchy2.TPM.top30.heatmap.pdf]

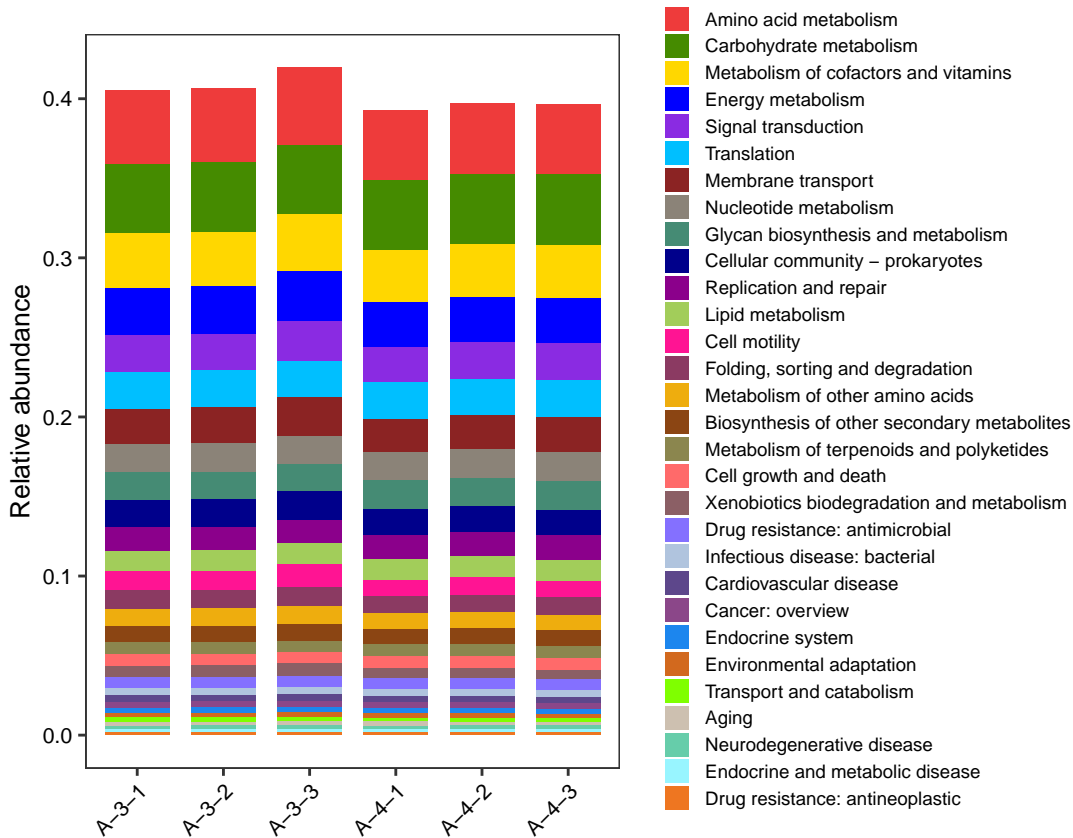

Supplement: Raw_data_3.zip [file Sample.KEGG.pathway_hierarchy2.percentage.top30.histogram.pdf › Raw data 3 Structural of microbial communities/Sample.KEGG.pathway_hierarchy2.percentage.top30.histogram.pdf]

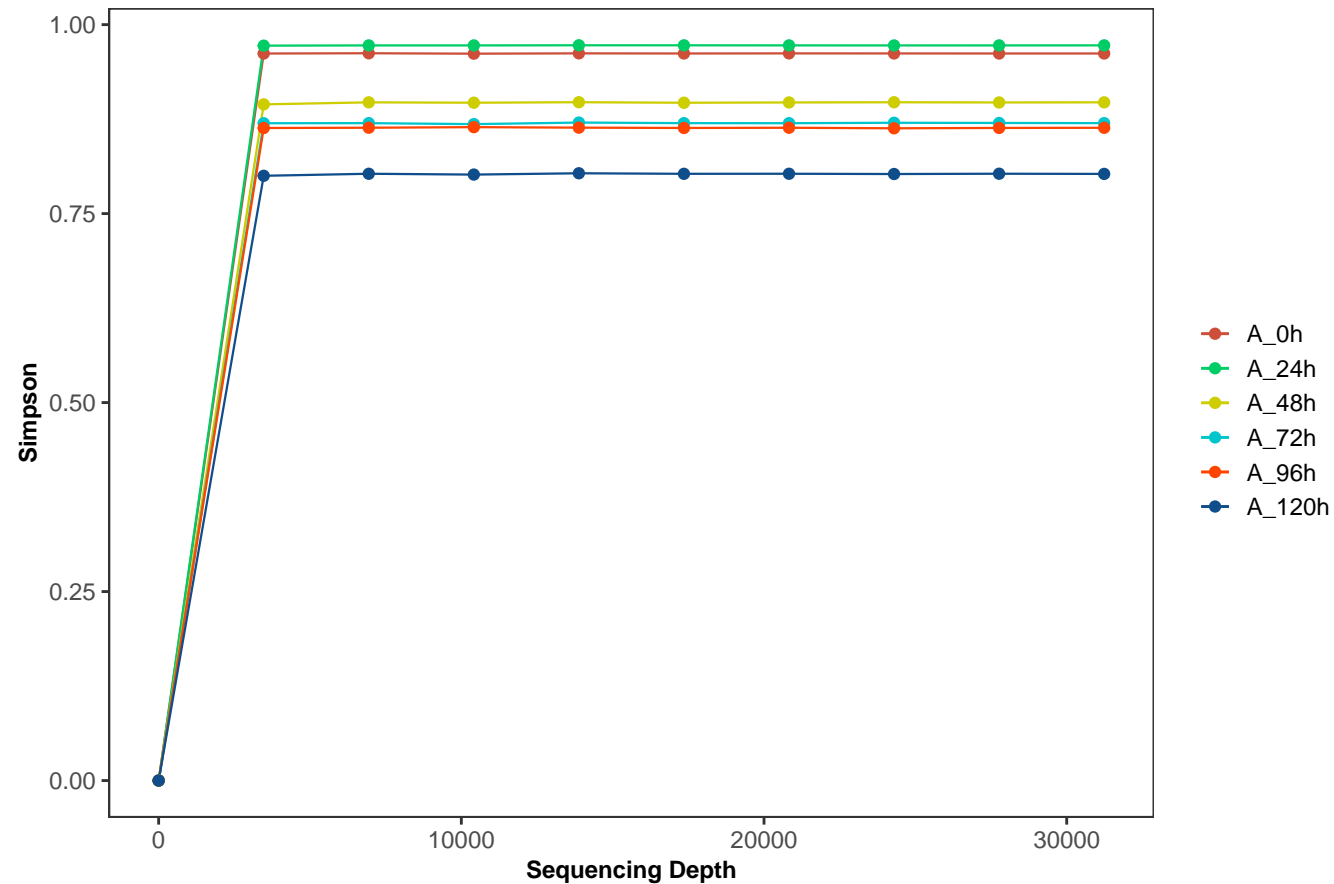

Supplement: Raw_data_3.zip [file Simpson_rare_curve_errorbar.group.pdf › Raw data 3 Structural of microbial communities/Simpson_rare_curve_errorbar.group.pdf]

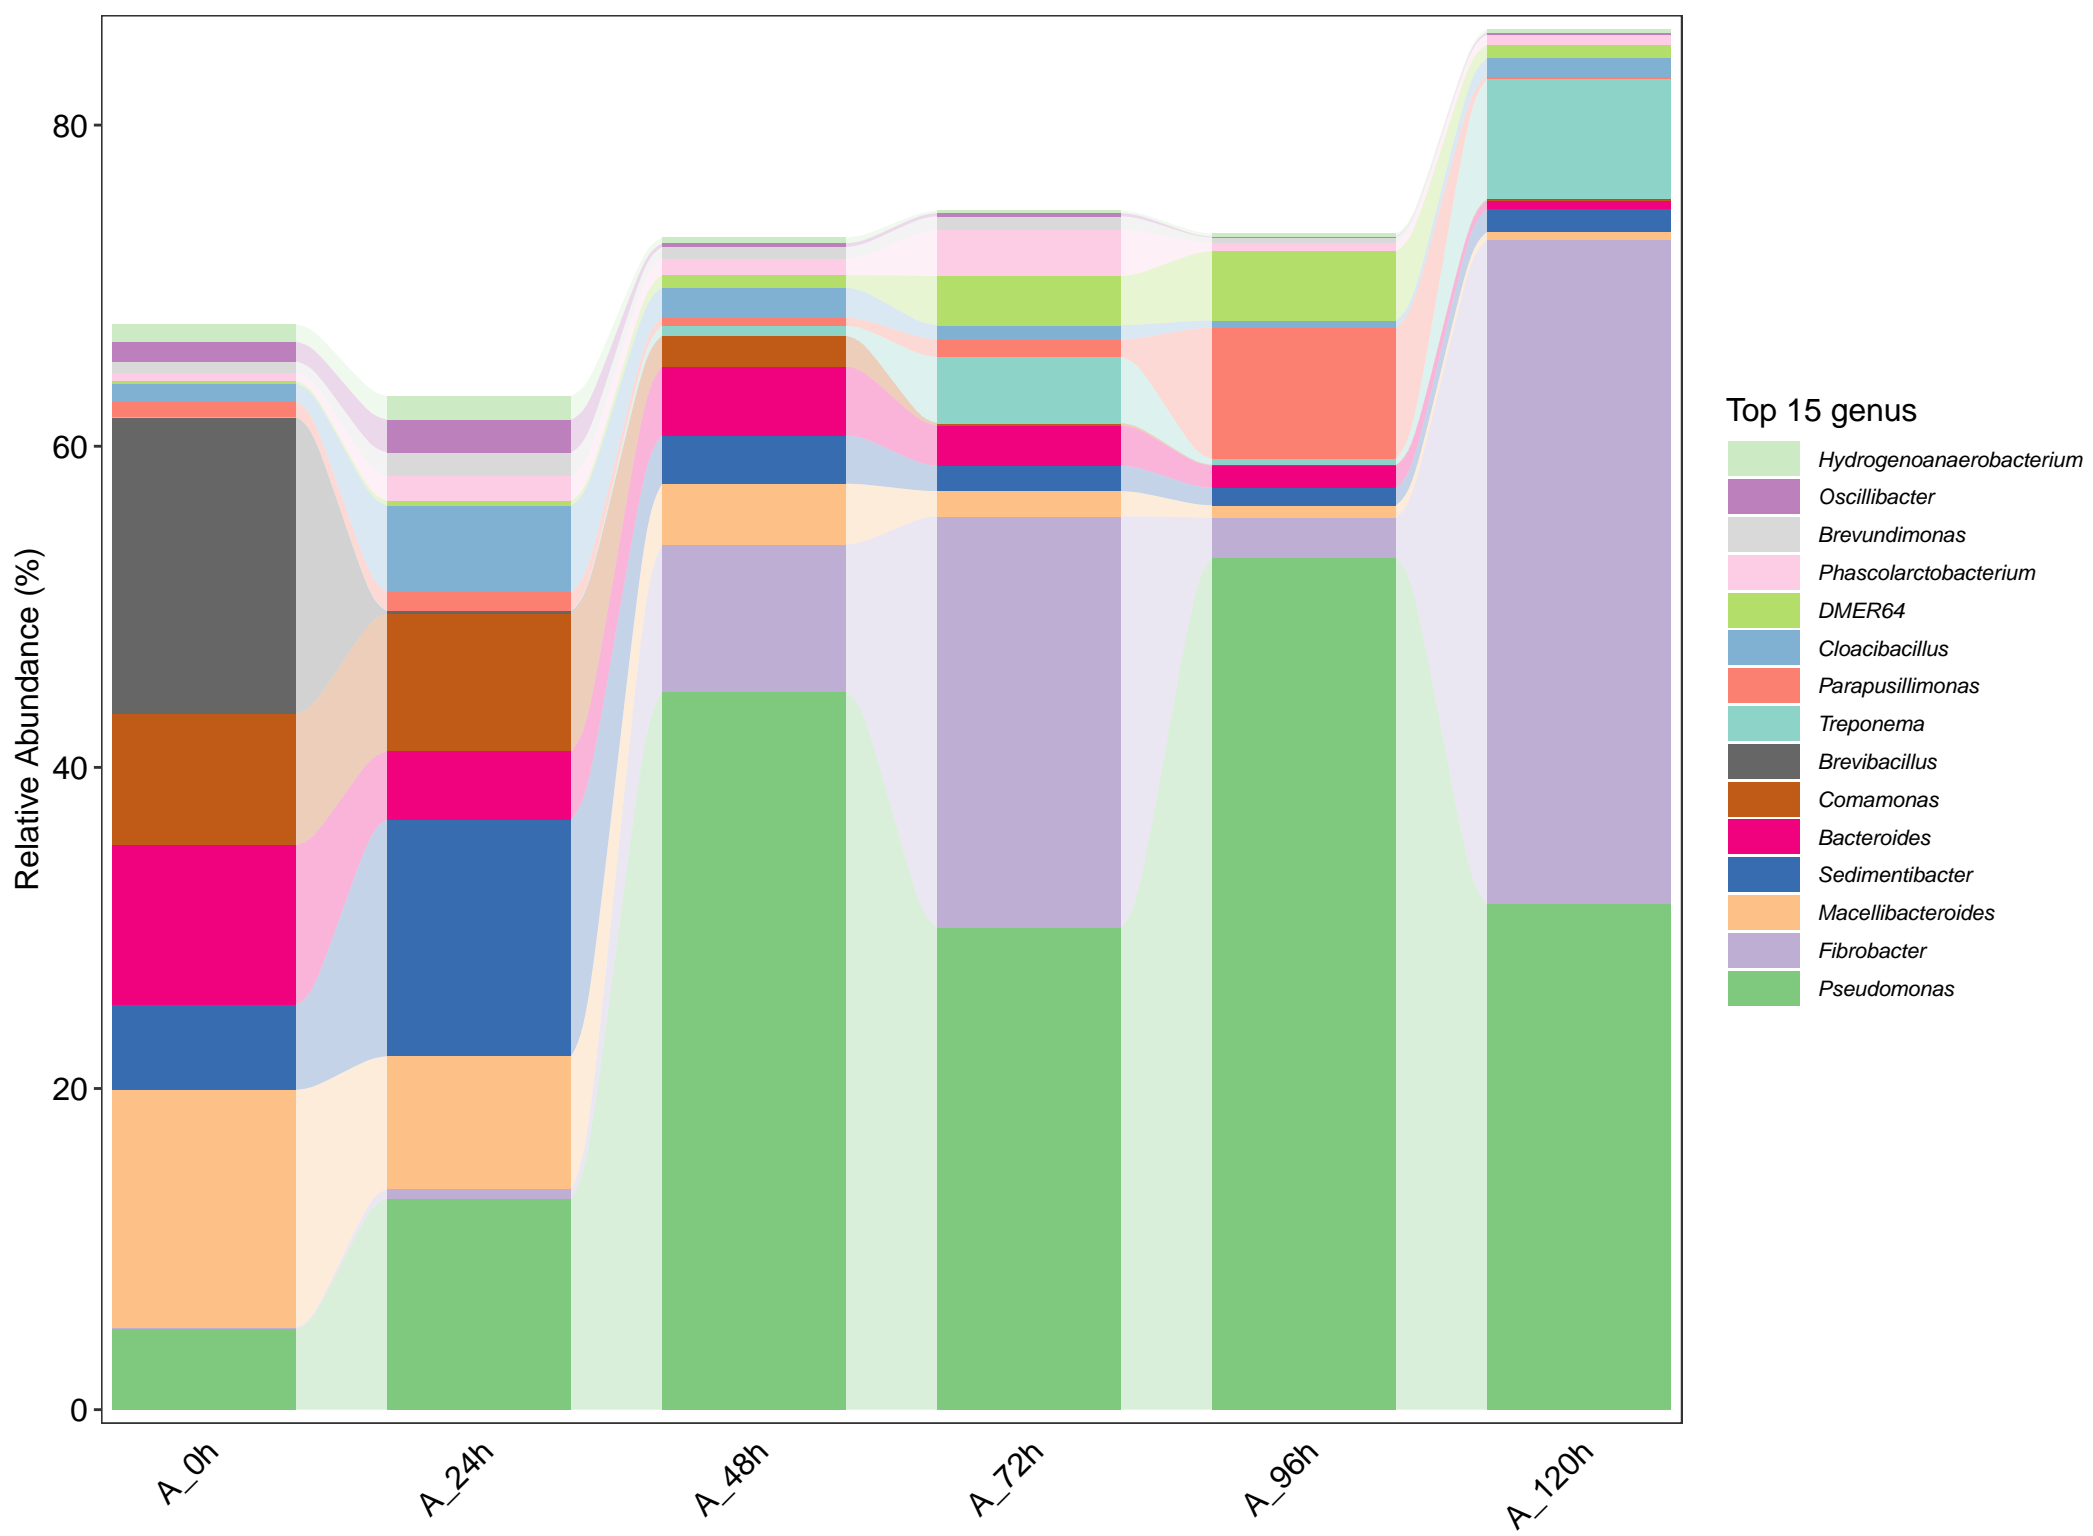

Supplement: Raw_data_3.zip [file bar_genus.pdf › Raw data 3 Structural of microbial communities/bar_genus.pdf]

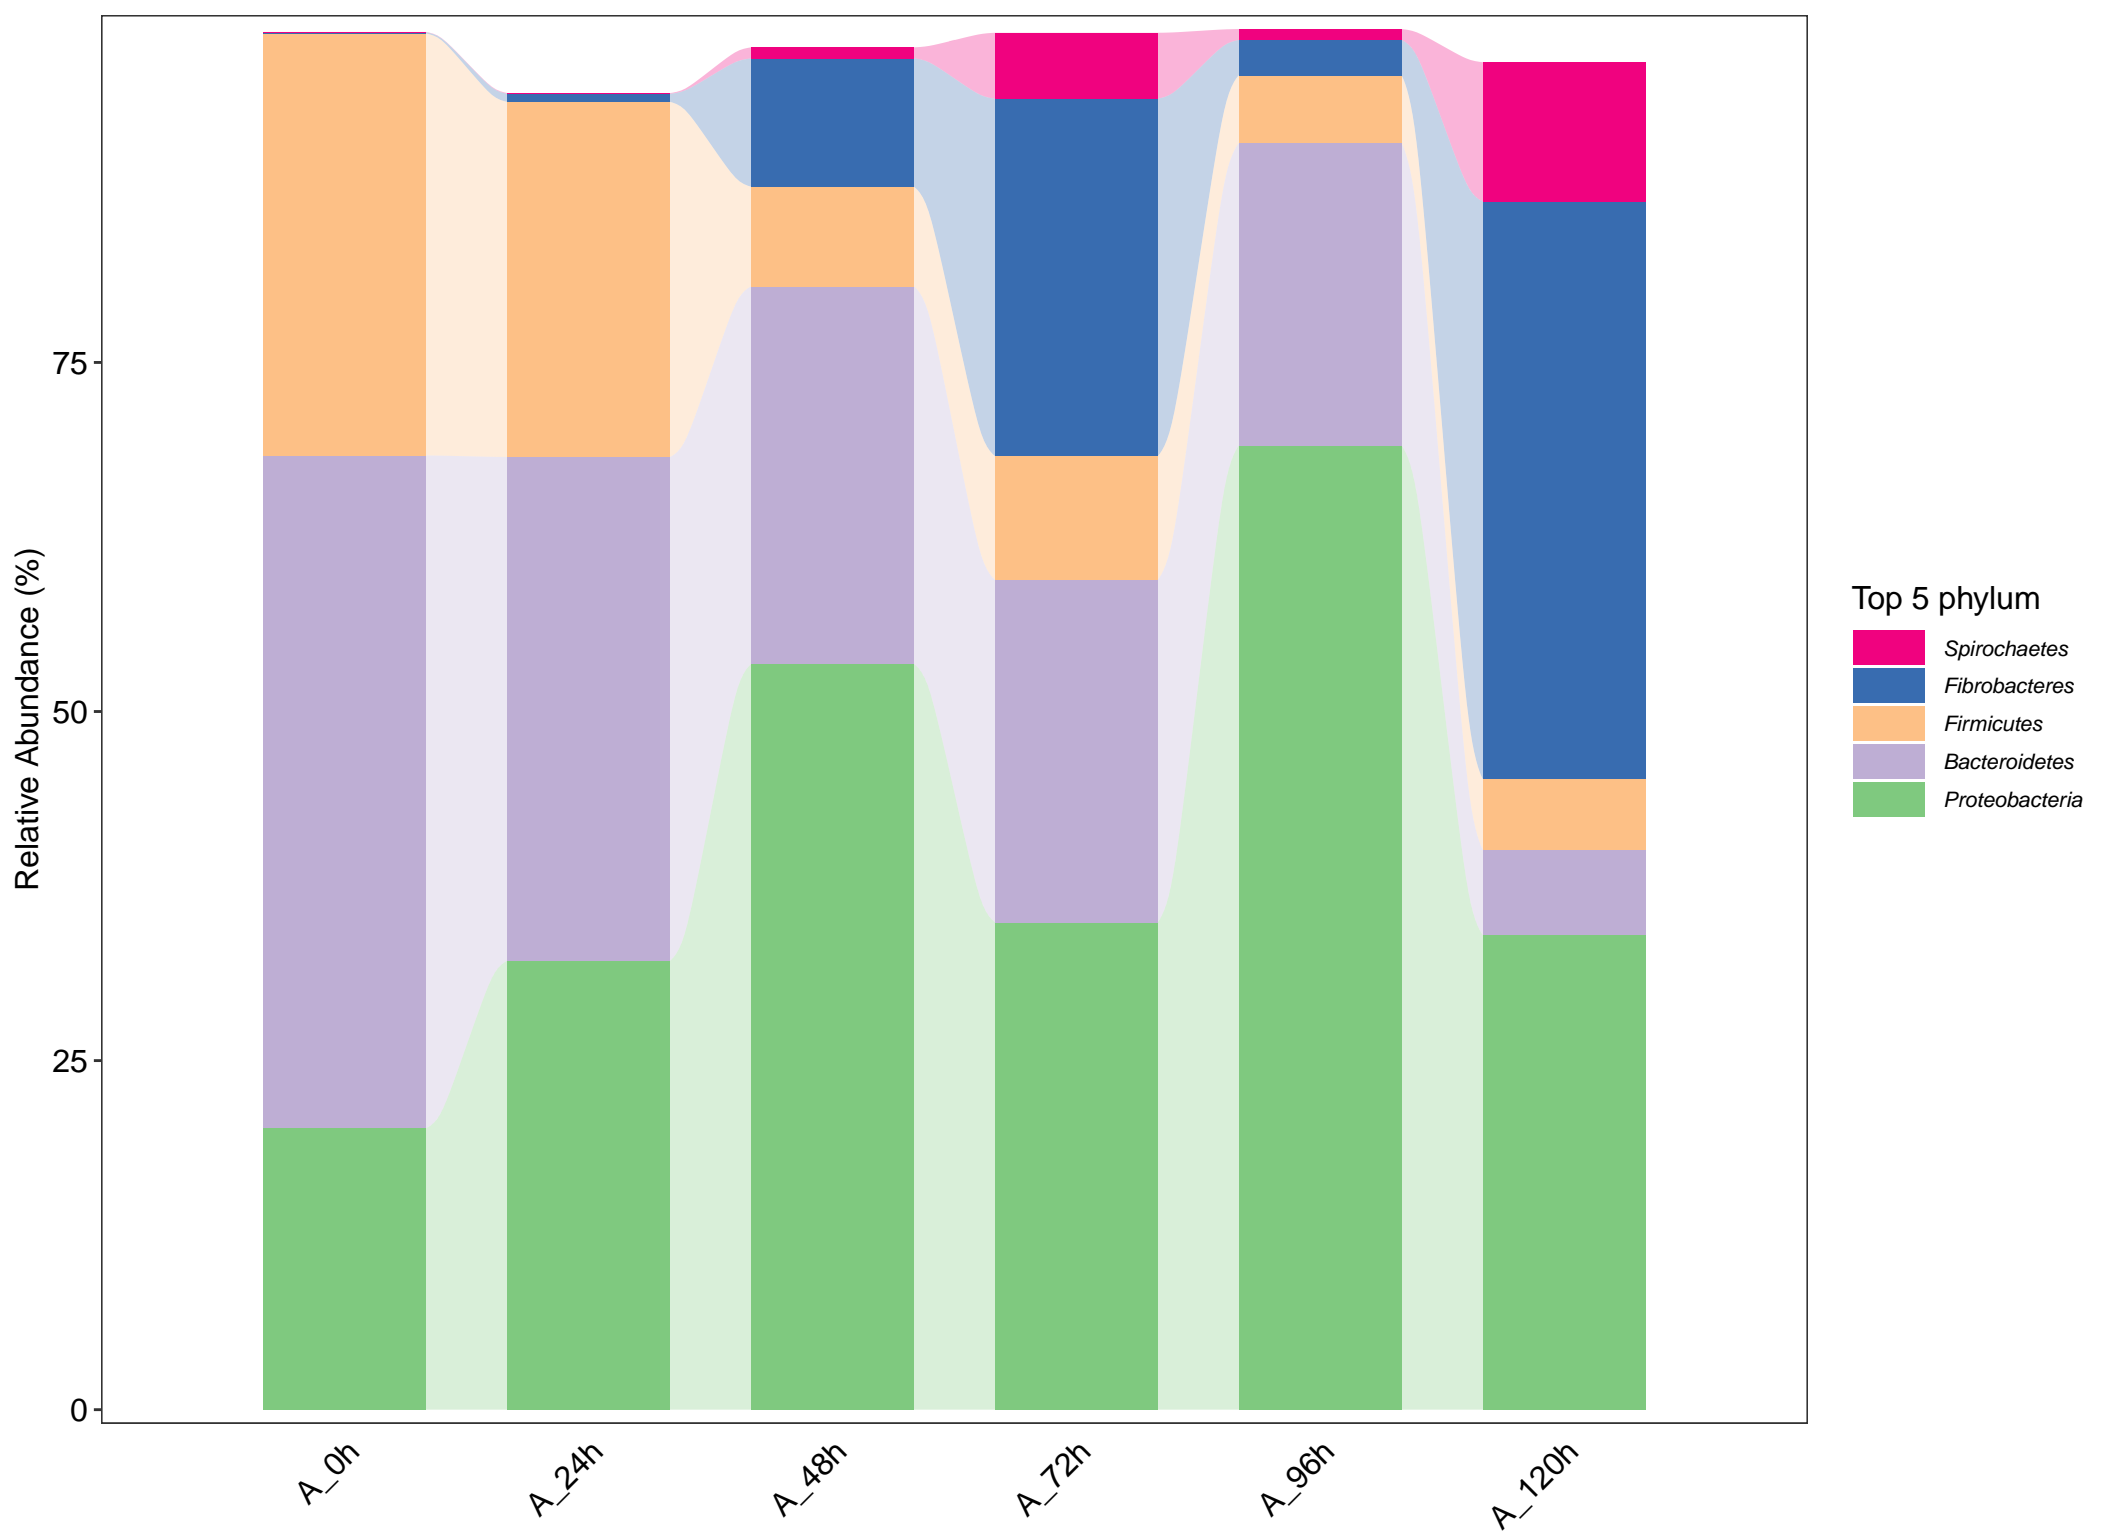

Supplement: Raw_data_3.zip [file bar_phylum.pdf › Raw data 3 Structural of microbial communities/bar_phylum.pdf]

# eggNOG classification statistics

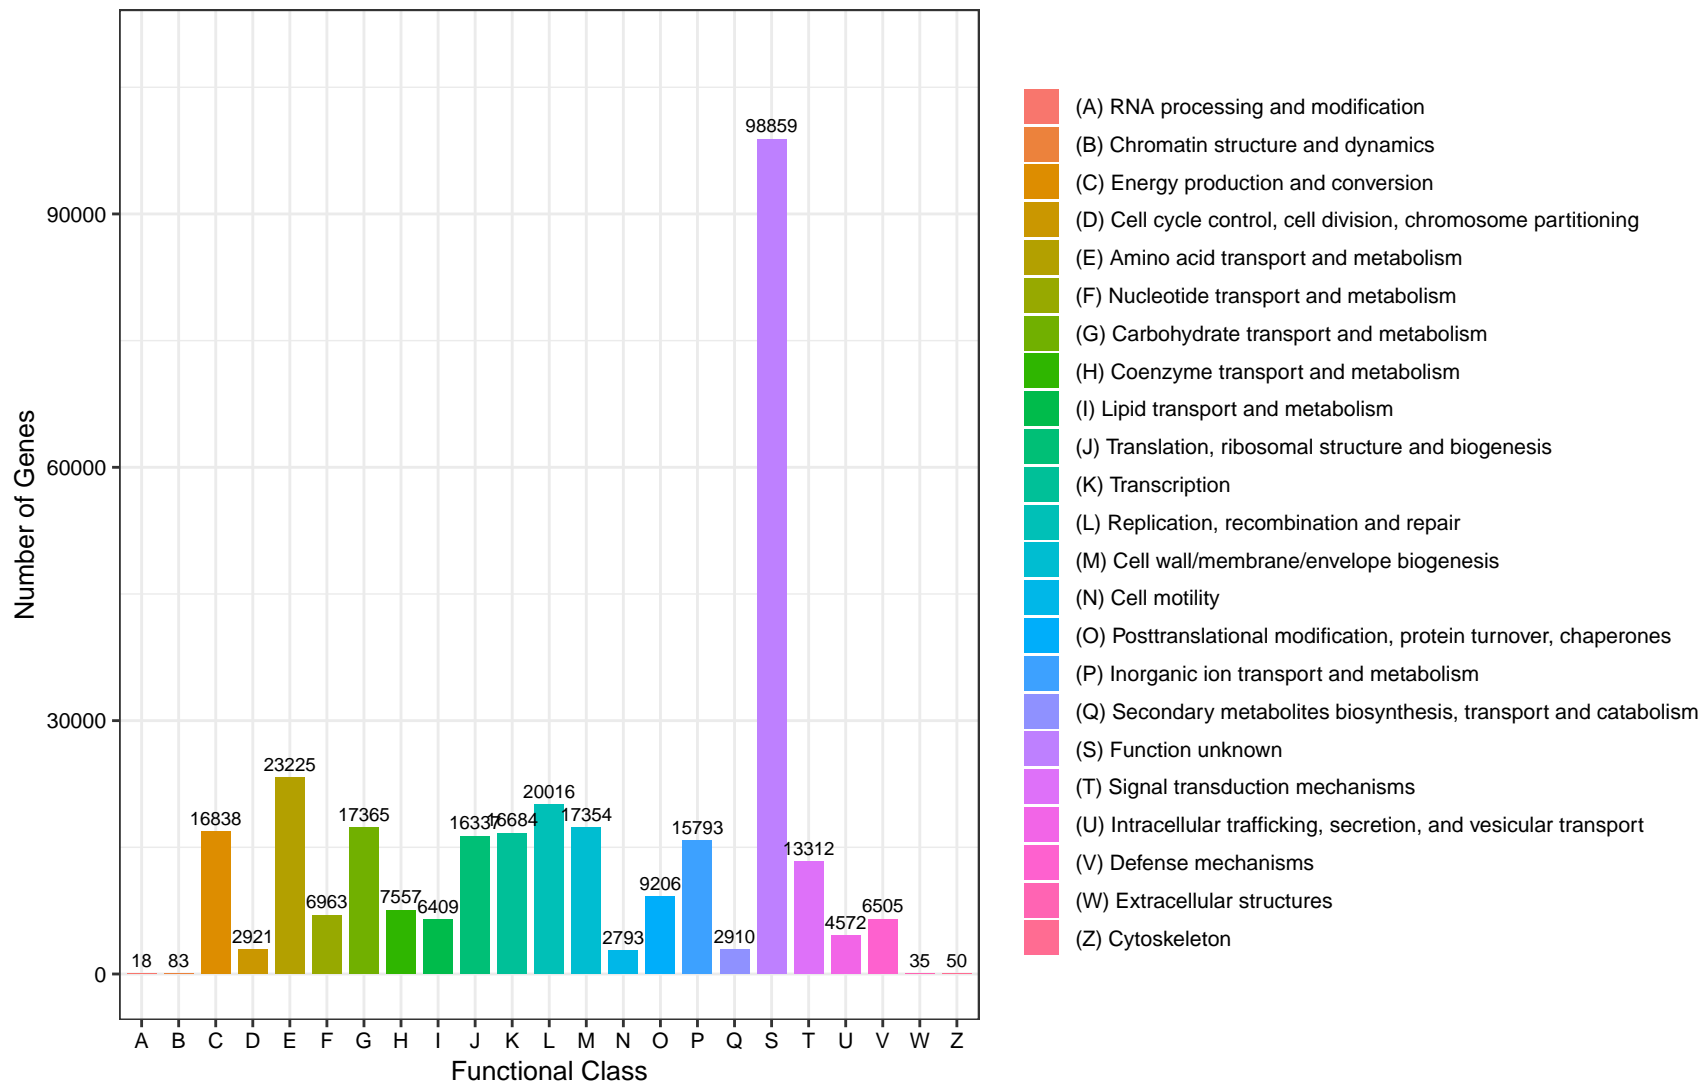

Supplement: Raw_data_3.zip [file eggNOG_classification.pdf › Raw data 3 Structural of microbial communities/eggNOG_classification.pdf]

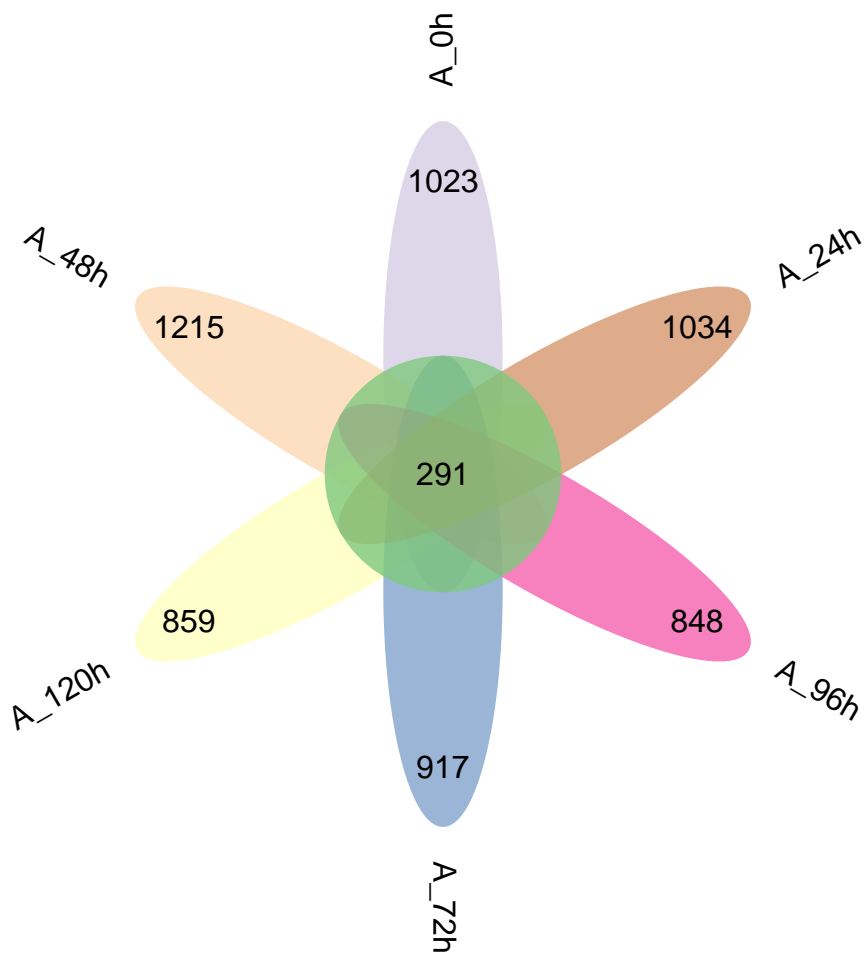

Supplement: Raw_data_3.zip [file flower.plot.pdf › Raw data 3 Structural of microbial communities/flower.plot.pdf]

Rank Abundance Curve

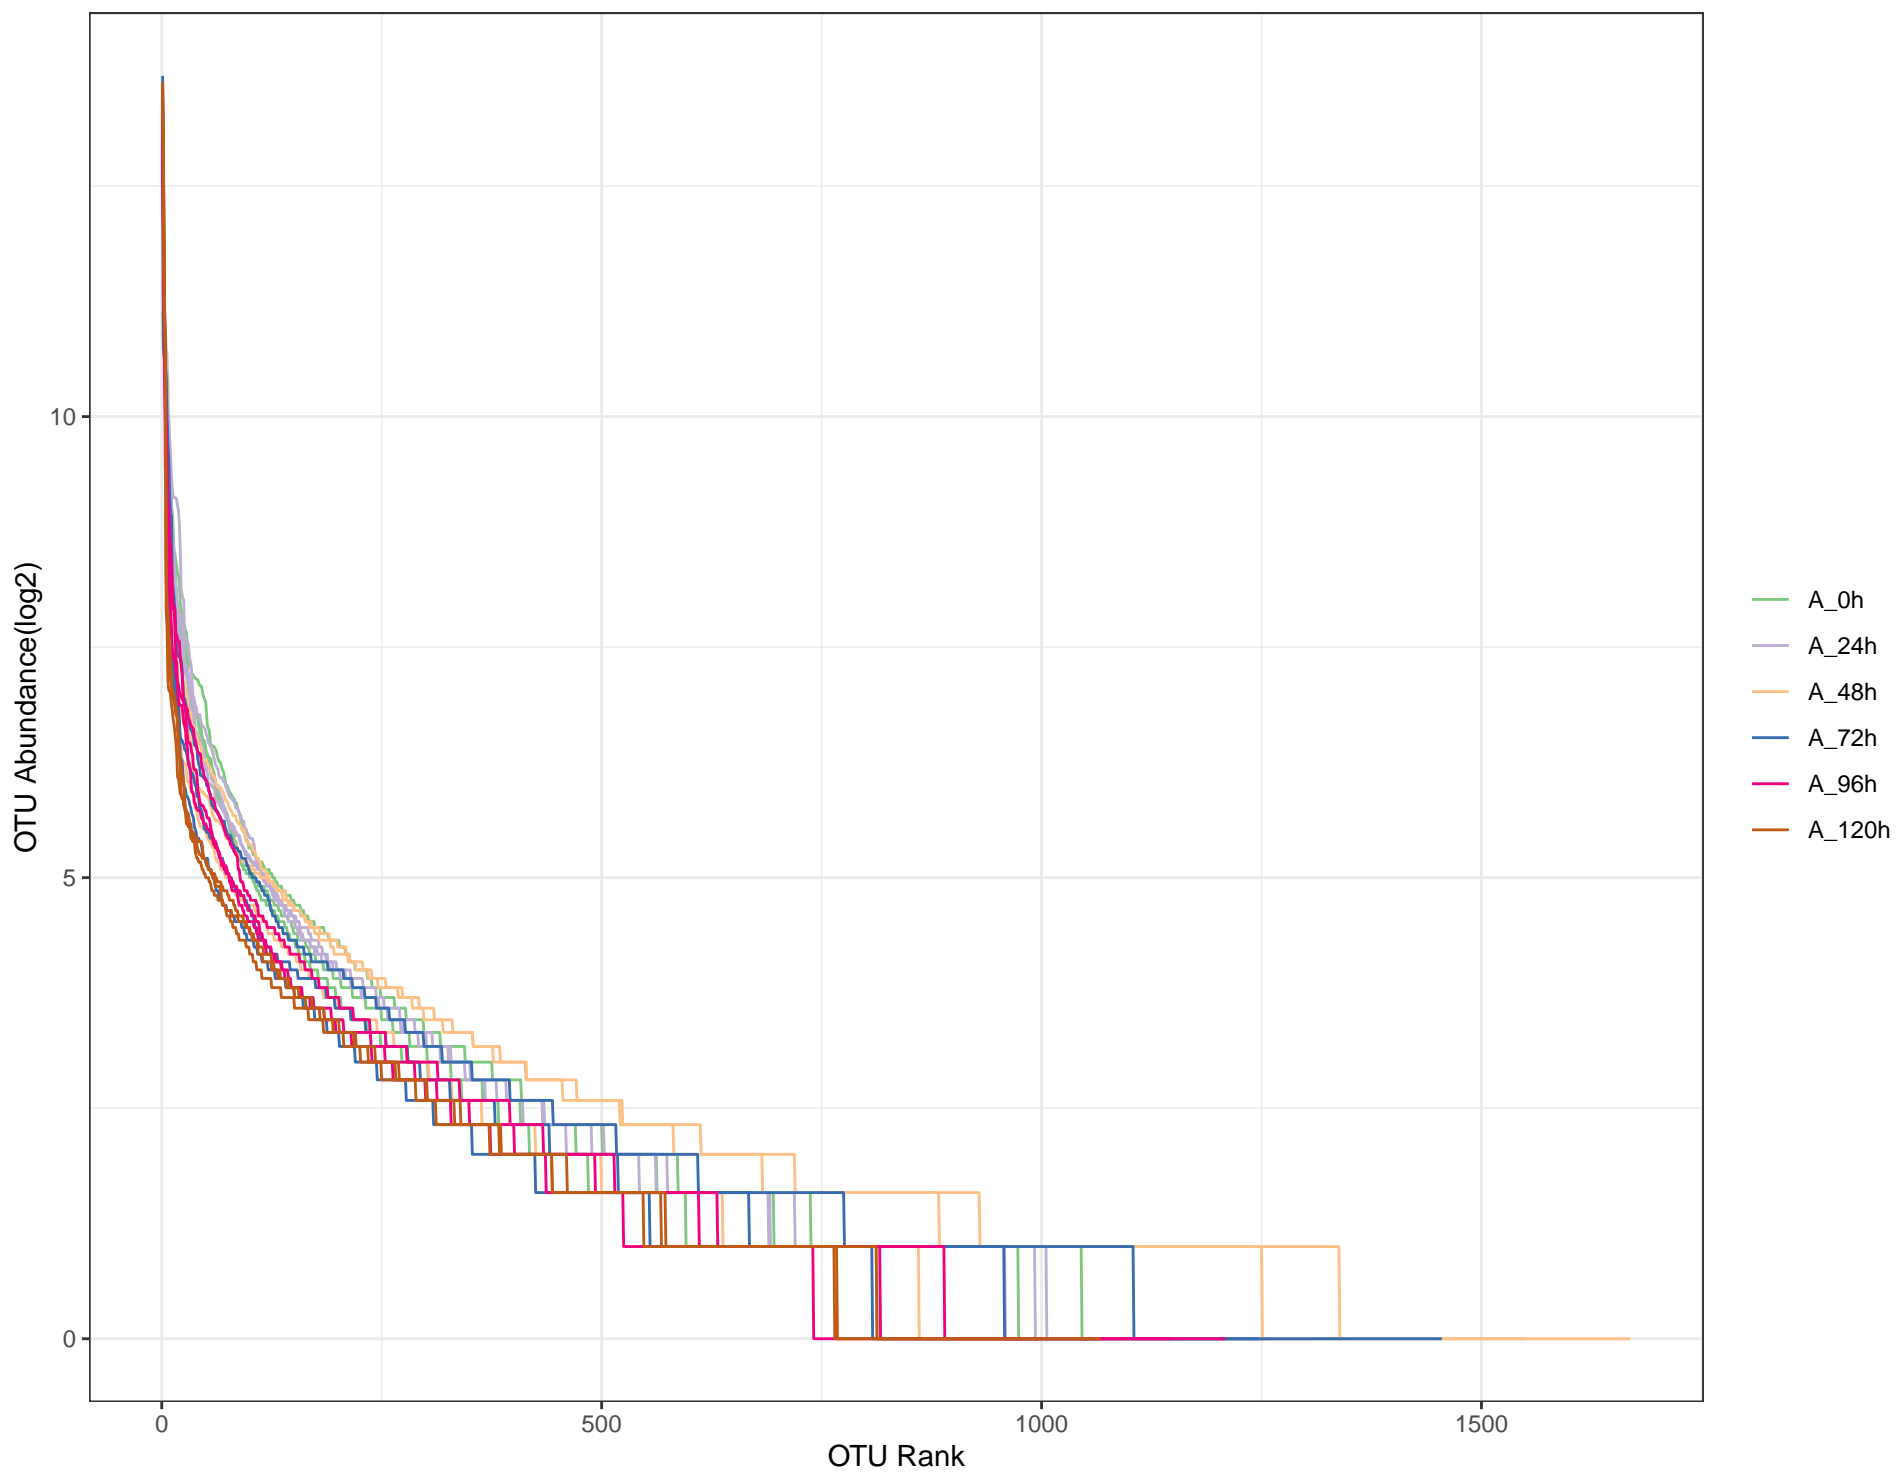

Supplement: Raw_data_3.zip [file rabund.pdf › Raw data 3 Structural of microbial communities/rabund.pdf]

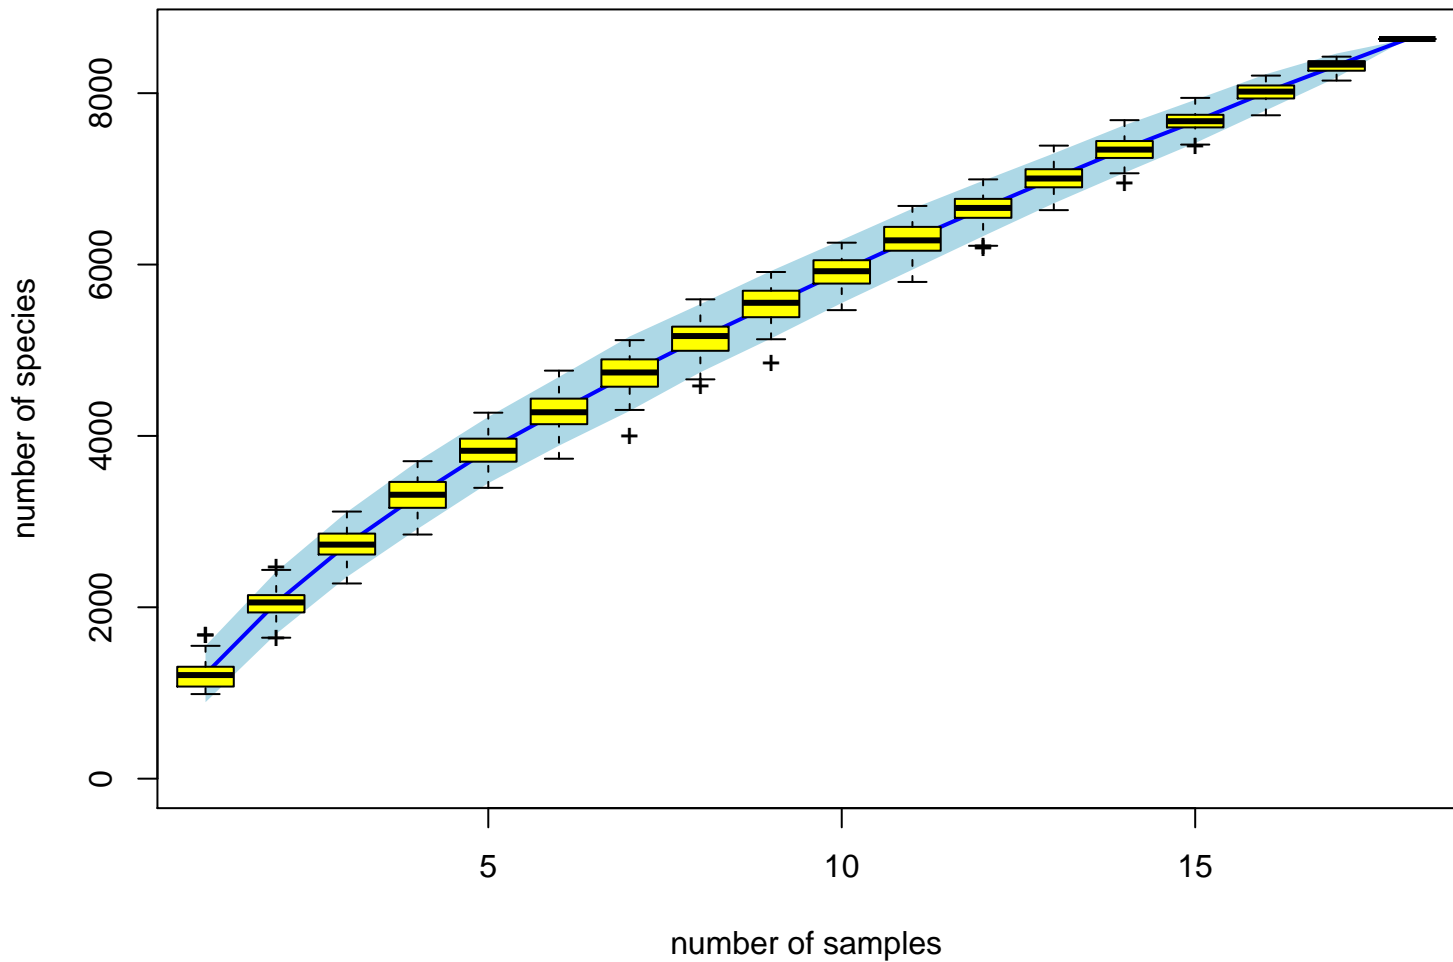

Supplement: Raw_data_3.zip [file specaccum.pdf › Raw data 3 Structural of microbial communities/specaccum.pdf]

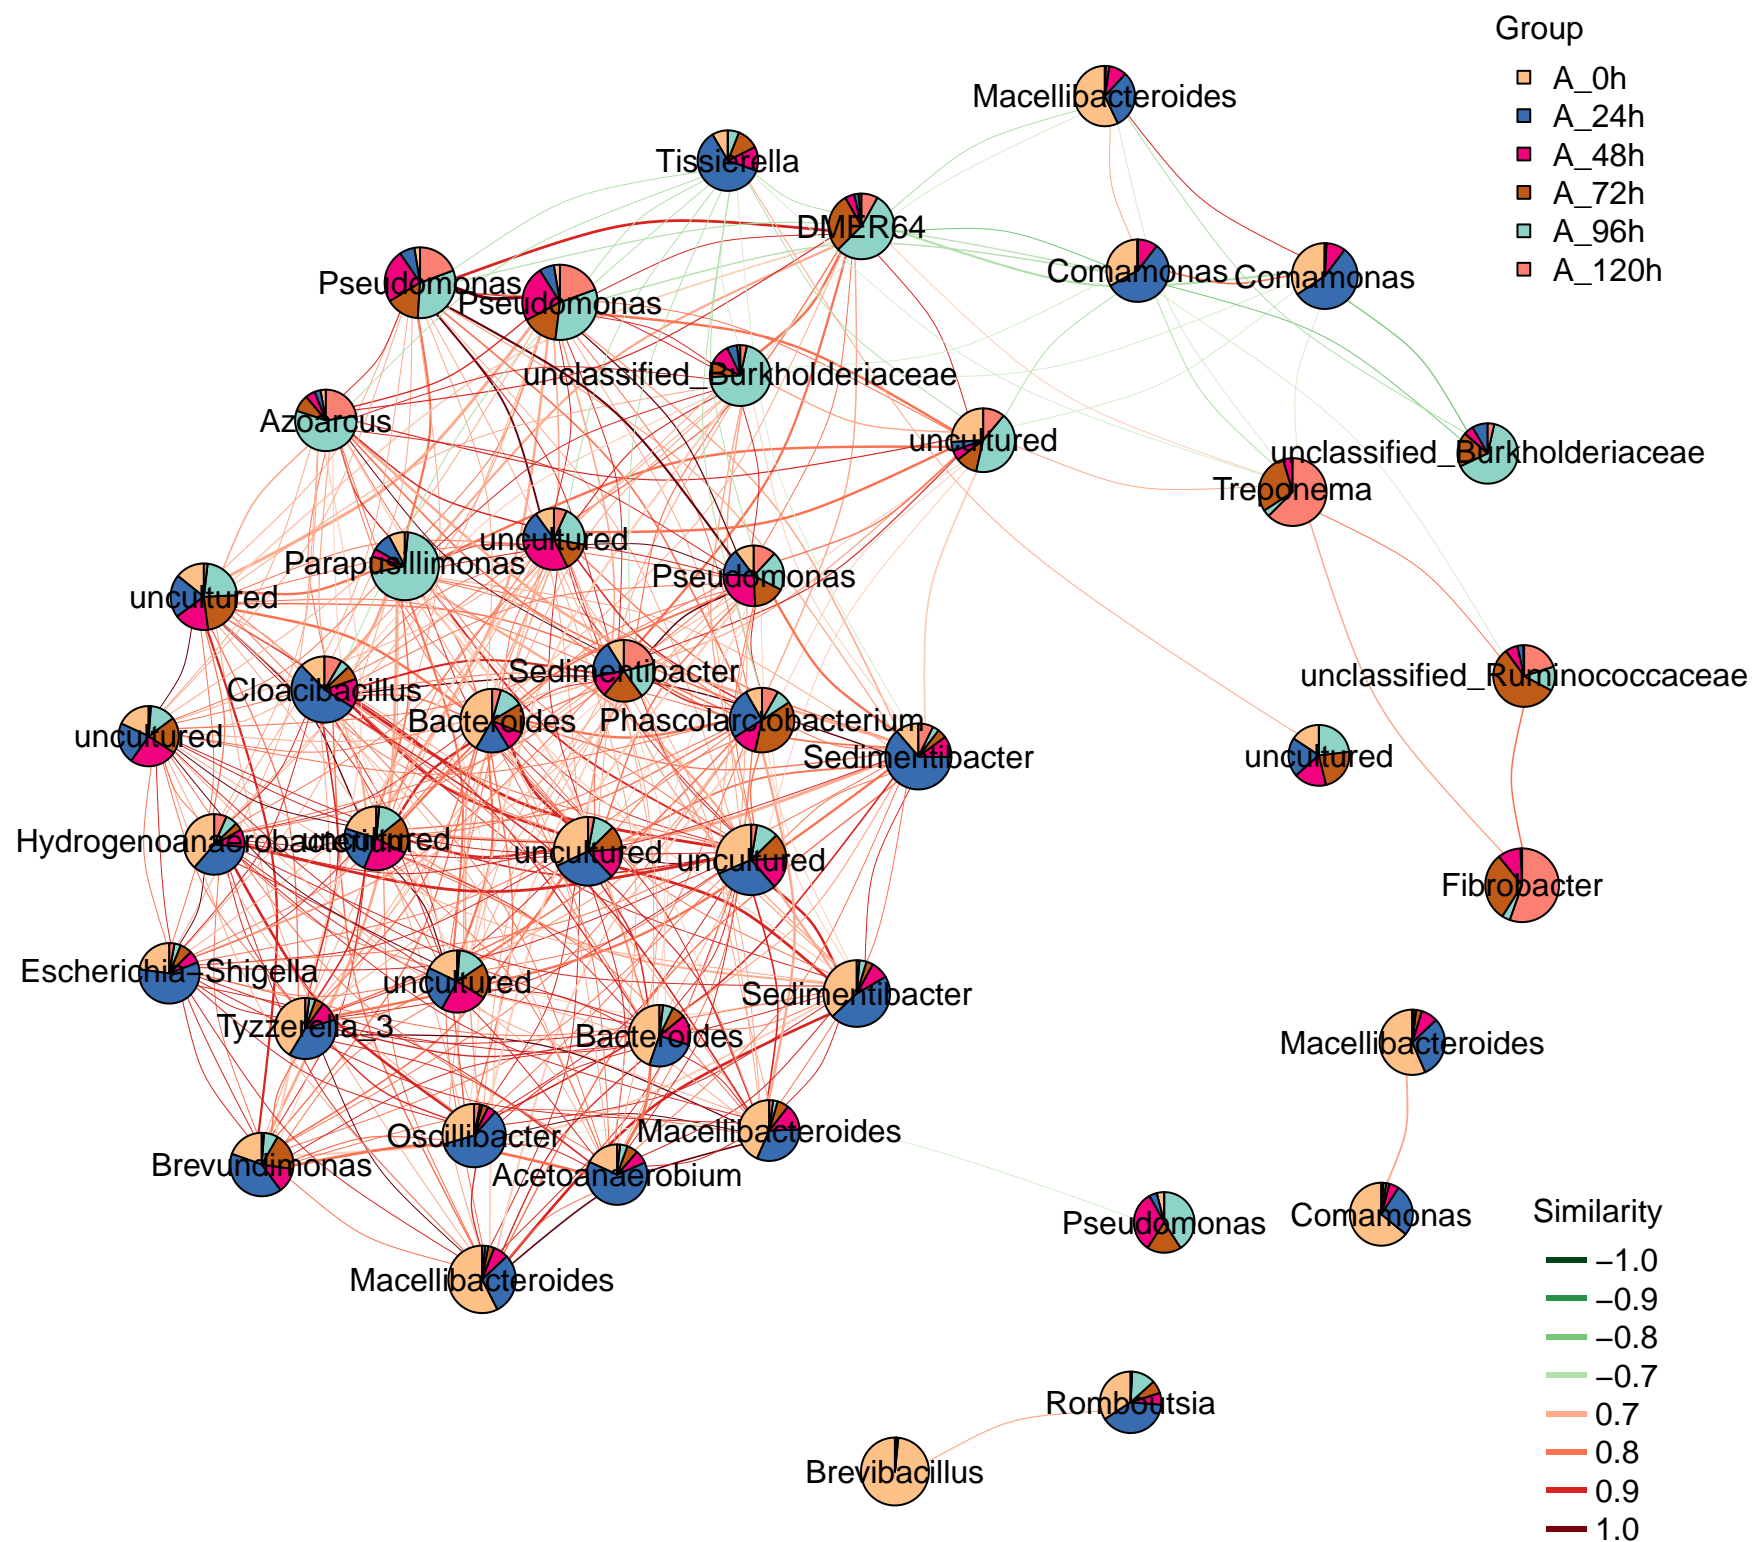

Supplement: Raw_data_3.zip [file subnetwork_group_top50.pdf › Raw data 3 Structural of microbial communities/subnetwork_group_top50.pdf]

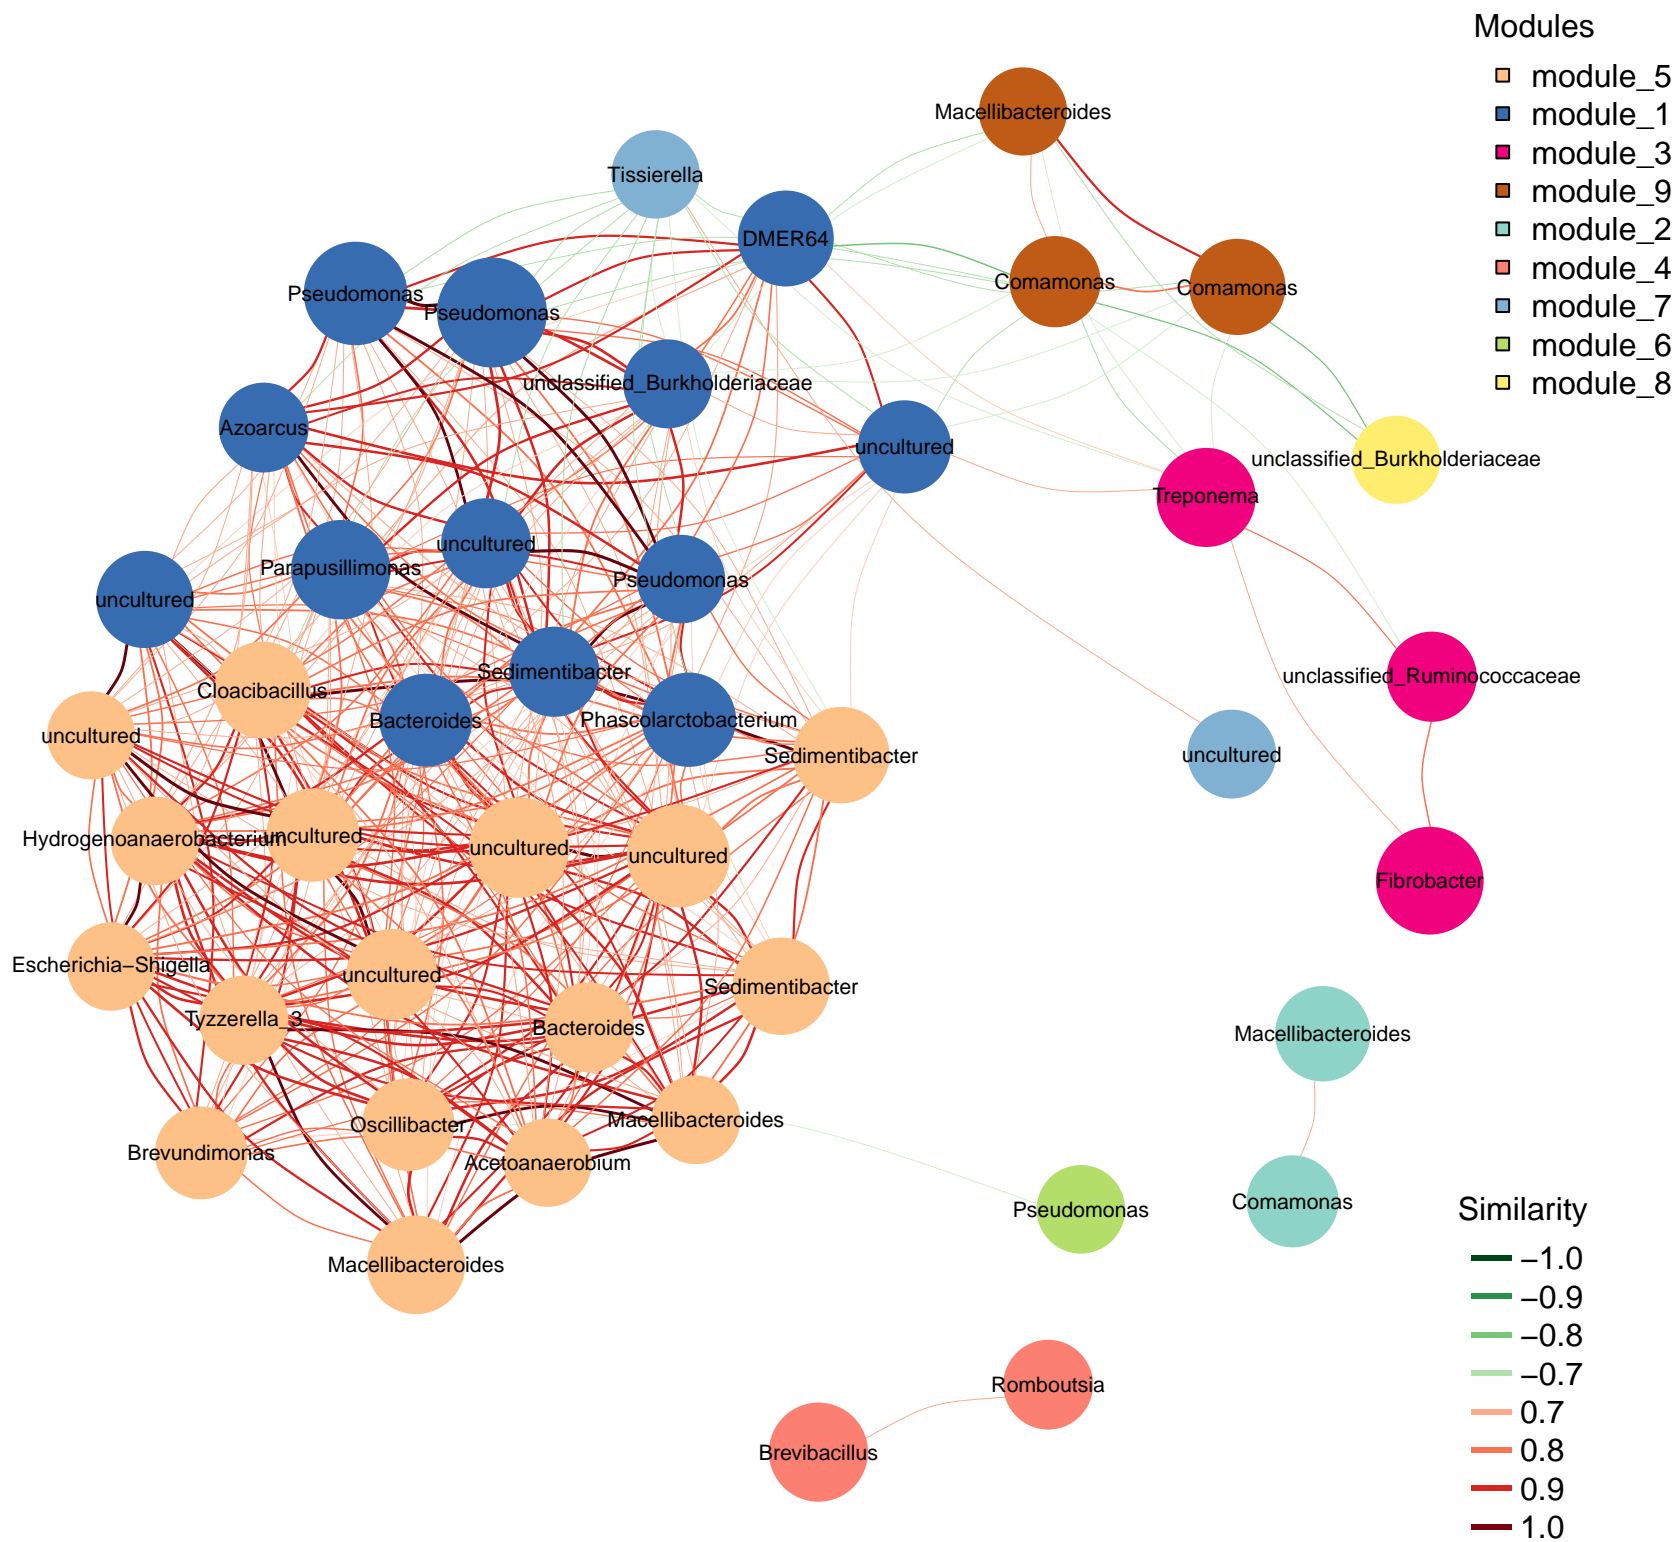

Supplement: Raw_data_3.zip [file subnetwork_module_top50.pdf › Raw data 3 Structural of microbial communities/subnetwork_module_top50.pdf]
